## 1 **Manipulating neural dynamics to tune motion detection**

2 Aneysis D. Gonzalez-Suarez<sup>1</sup>, Jacob A. Zavatone-Veth<sup>2,3</sup>, Juyue Chen<sup>1</sup>, Catherine A. Matulis<sup>4</sup>,  
3 Bara A. Badwan<sup>5</sup>, and Damon A. Clark<sup>1,4,6,7,\*</sup>

4  
5 <sup>1</sup>Interdepartmental Neuroscience Program; Yale University, New Haven, CT 06511, USA.

6 <sup>2</sup>Department of Physics, Harvard University; Cambridge, MA 02138, USA.

7 <sup>3</sup>Center for Brain Science, Harvard University; Cambridge, MA 02138, USA.

8 <sup>4</sup>Department of Physics, Yale University; New Haven, CT 06511, USA.

9 <sup>5</sup>School of Engineering and Applied Science, Yale University; New Haven, CT 06511, USA.

10 <sup>6</sup>Department of Molecular, Cellular, and Developmental Biology, Yale University; New Haven,  
11 CT 06511, USA.

12 <sup>7</sup>Department of Neuroscience, Yale University; New Haven, CT 06511, USA.

13 \*Corresponding author.

14

### 15 **Abstract**

16

17 Neurons integrate excitatory and inhibitory signals to produce their outputs, but the role of input  
18 timing in this integration remains poorly understood. Motion detection is a paradigmatic example  
19 of this integration, since theories of motion detection rely on different delays in visual signals.  
20 These delays allow circuits to compare scenes at different times to calculate the direction and  
21 speed of motion. It remains untested how response dynamics of individual cell types drive  
22 motion detection and velocity sensitivity. Here, we sped up or slowed down specific neuron  
23 types in *Drosophila*'s motion detection circuit by manipulating ion channel expression. Altering  
24 the dynamics of individual neurons upstream of motion detectors changed their integrating  
25 properties and increased their sensitivity to fast or slow visual motion, exposing distinct roles for  
26 dynamics in tuning directional signals. A circuit model constrained by data and anatomy  
27 reproduced the observed tuning changes. Together, these results reveal how excitatory and  
28 inhibitory dynamics jointly tune a canonical circuit computation.

29

### 30 **Introduction**

31

32 When a neuron integrates synaptic inputs, the dynamics of those inputs are critical to the  
33 neuron's output response. However, the role of neural input dynamics in basic computations  
34 remains poorly understood, in part because of difficulties in manipulating neural response  
35 dynamics. Previous studies have predominantly manipulated neural dynamics by using  
36 temperature and pharmacology (Arenz et al., 2017; Banerjee et al., 2021; Long and Fee, 2008;  
37 Suver et al., 2012; Tang et al., 2010), but these methods affect entire circuits, making it difficult  
38 to investigate how dynamics of individual excitatory and inhibitory input neurons drive  
39 computation. In this study, we use the powerful genetic tools in *Drosophila* to manipulate  
40 dynamics of *individual* excitatory and inhibitory visual neuron types to examine how these  
41 dynamics tune downstream computations.

42

43 Circuits that detect visual motion offer a robust testbed for understanding how excitatory and  
44 inhibitory input dynamics contribute to the computations of downstream neurons. To detect  
45 motion, neurons must integrate visual information over both space and time. Indeed, theories of  
46 visual motion detection require adjacent visual signals to be processed with different delays to

47 generate direction-selective responses (Adelson and Bergen, 1985; Barlow and Levick, 1965;  
48 Hassenstein and Reichardt, 1956) (Fig. 1A). In both vertebrates and invertebrates, these different  
49 delays are thought to be implemented through the response dynamics of neurons upstream of  
50 motion-detecting cells (Arenz et al., 2017; Kim et al., 2014). However, it remains untested how  
51 the dynamics of upstream excitatory and inhibitory neurons drive downstream motion signals.  
52 Motion computation is a compelling framework for investigating this question because motion  
53 signals are highly interpretable in their selectivity for direction and speed of motion.

54  
55 *Drosophila's* motion detection circuits are anatomically and functionally well-characterized. In  
56 the fly eye, light intensity is first detected by photoreceptors before signals are split into ON and  
57 OFF pathways that detect light increments and decrements, respectively (Clark et al., 2011;  
58 Joesch et al., 2010; Silies et al., 2014). Within each pathway, interneurons delay and rectify  
59 visual signals (Arenz et al., 2017; Behnia et al., 2014; Strother et al., 2014; Yang et al., 2016)  
60 before synapsing onto the elementary direction-selective (DS) neurons of the ON and OFF  
61 pathways, T4 and T5 (Maisak et al., 2013). T4 and T5 neurons are classified into subtypes that  
62 respond preferentially to motion in one of four cardinal directions (Maisak et al., 2013). At least  
63 four types of interneurons, with different spatiotemporal response profiles, synapse onto T4 cells  
64 (Shinomiya et al., 2019; Takemura et al., 2017), which then integrate these signals to generate  
65 DS responses (Badwan et al., 2019; Gruntman et al., 2018; Haag et al., 2016; Leong et al., 2016;  
66 Salazar-Gatzimas et al., 2016; Strother et al., 2017). Output signals from T4 and T5 cells are then  
67 summed over space to guide visually-evoked behaviors (Creamer et al., 2018; Leonte et al.,  
68 2021; Maisak et al., 2013; Schilling and Borst, 2015).

69  
70 Anatomical and physiological studies have suggested different models to explain how T4 cells  
71 detect the direction and speed of motion (Arenz et al., 2017; Badwan et al., 2019; Gruntman et  
72 al., 2018; Haag et al., 2016; Leong et al., 2016; Salazar-Gatzimas et al., 2018; Shinomiya et al.,  
73 2019; Strother et al., 2017; Zavatone-Veth et al., 2020), all of which depend on relative delays  
74 between signals at adjacent points in space (Figure 1A). In textbook versions of these models  
75 (Barlow and Levick, 1965; Hassenstein and Reichardt, 1956), the tuning of the motion detector  
76 to different velocities is fully determined by the relative delay in peak responses between two  
77 inputs (Figure 1A). Accordingly, changing the relative delay should predictably alter the tuning  
78 of DS signals. It is untested whether such delays are sufficient to explain how input neurons tune  
79 motion detection in *Drosophila*, or whether more complex temporal processing properties must  
80 be considered. More broadly, it remains unclear how DS circuits achieve selectivity for different  
81 speeds of motion. Neuro-modulators alter the tuning of motion detectors and the dynamics of  
82 their inputs (Arenz et al., 2017), but they act broadly and alter many properties, including the  
83 dynamics, of many neurons in the circuit (Strother et al., 2018). Thus, it also remains unknown  
84 how the dynamics of individual excitatory and inhibitory cell types contribute to downstream  
85 motion detection.

86  
87 In this work, we altered the expression of specific membrane ion channels in four individual  
88 excitatory and inhibitory cell types in the fly motion detection circuit. We showed that these  
89 genetic manipulations of single cell types alter the dynamics of light responses in these neurons.  
90 Then, to test models of motion estimation, we asked how those manipulations of neural  
91 dynamics influence the tuning of downstream motion signals in T4 neurons. To do this, we  
92 manipulated ion channel expression in individual neuron types upstream of T4 neurons while

93 measuring the responses of T4 to different speeds of visual motion. This resulted in altered  
94 tuning curves, showing how the different manipulations changed the sensitivity of T4 neurons to  
95 motion of different speeds. In the case of an interneuron that influences the ON and OFF motion  
96 pathways, we showed that these changes are also reflected in behavior. Last, we developed  
97 circuit models that are strongly constrained by anatomy and our measurements of response  
98 dynamics. We compared these models to our experimental data, and found that parallel,  
99 redundant excitatory and inhibitory inputs are required to explain our experimental data.  
100 Moreover, the full linear filtering properties of the inputs—rather than just delays—are necessary  
101 to reproduce our experimental observations. These results reveal how the timing of excitatory  
102 and inhibitory inputs generate motion signals and tune their sensitivity.

103

## 104 **Results**

105

### 106 *Measuring the response dynamics of medulla neurons using stochastic visual stimuli*

107

108 To investigate the role of individual interneurons in motion detection, we first measured the  
109 dynamic visual responses of inputs to T4 cells. We targeted four ON-cell types with  
110 anatomically identified synapses onto T4: Mi1, Tm3, Mi4, and CT1 (Figure 1B) (Takemura et  
111 al., 2017). Using *in vivo* two-photon microscopy, we recorded responses of these different cell  
112 types expressing the calcium indicator GCaMP6f (Chen et al., 2013) (Figure 1C), while their  
113 activity was driven by a stochastic, binary stimulus (Figure 1D). From these neural responses, we  
114 used standard methods (Chichilnisky, 2001) to extract the linear filters that best predicted the  
115 neuron's response to the preceding stimulus (Figures 1E-F). While this method does not capture  
116 all the features of temporal processing, these filters can quantify many dynamical response  
117 properties of these neurons. For instance, a peak response that occurs after a short delay  
118 corresponds to a fast filter that represents a fast neural response to light signals. The filter shape  
119 also determines how much signal is passed at different temporal frequencies, with narrowly  
120 peaked filters transmitting more signal at high temporal frequencies. Consistent with previous  
121 findings, Mi1 dynamics were slower than Tm3 (Behnia et al., 2014), while both Mi1 and Tm3  
122 dynamics were faster than Mi4 (Arenz et al., 2017; Strother et al., 2017) (Figure 1F). The  
123 dynamics of CT1 terminals were also consistent with previous measurements (Figure 1F) (Meier  
124 and Borst, 2019).

125

### 126 *Manipulating endogenous ion channel expression alters neural dynamics*

127

128 After measuring the wildtype dynamics of Mi1, Tm3, Mi4, and CT1, we designed experiments to  
129 manipulate these cells by increasing or decreasing the expression of specific ion channels while  
130 co-expressing GCaMP6f to record the neuron's response. We first tested how Mi1 dynamics  
131 were affected by knocking down several candidate ion channels, using either RNA interference  
132 (RNAi) or dominant-negative mutations (Figure S1). Based on these experiments, we chose to  
133 pursue manipulations using the channels *slowpoke* and *cacophony* because they had the largest  
134 effect sizes, are widely expressed in flies, and elicited opposing changes in Mi1 dynamics. We  
135 first manipulated the expression levels of *slo* (Elkins et al., 1986), a voltage-gated, Ca<sup>2+</sup>-activated  
136 K<sup>+</sup> channel and ortholog of BK-type channels in vertebrates (Marty, 1981; Pallotta et al., 1981).  
137 *Slowpoke* is widely expressed in *Drosophila* neurons, including many visual neurons (Becker et  
138 al., 1995; Davis et al., 2018). It has an established role in modulating neural excitability and

139 membrane conductance (Ford and Davis, 2014; Pattillo et al., 2001; Sun et al., 2004), and has  
140 relatively slow dynamics (Sah and Faber, 2002)—a property that makes it a candidate for  
141 helping induce the delays involved in *Drosophila* motion detection (Salazar-Gatzimas et al.,  
142 2016). The RNAi knock-down of *slo* (Perkins et al., 2015) slowed the dynamics of Mi1 slightly,  
143 demonstrating that *slowpoke* is necessary for wildtype dynamics (Figures 2A-B). If reduced *slo*  
144 slows the cell, we hypothesized that increased *slo* might speed it up. Indeed, when *slo* was over-  
145 expressed in Mi1, responses became faster, as quantified by faster filter peak and fall times  
146 (Figures 2C-D). Thus, manipulations of *slo* expression in Mi1 bi-directionally altered its  
147 dynamics.

148  
149 To investigate whether the role of *slo* generalized to other neurons, we performed the identical  
150 over-expression and RNAi knock-down experiments in Tm3 neurons (Figures 2E-H).  
151 Interestingly, each manipulation had the opposite effect in Tm3 as they had in Mi1. Expressing  
152 *slo*-RNAi in Tm3 resulted in faster responses, significantly reducing the filter fall time (Figures  
153 2E-F), while over-expressing *slo* in Tm3 resulted in slower responses (Figures 2G-H). A second,  
154 distinct *slo*-RNAi construct (Dietzl et al., 2007) showed similarly strong effects on the response  
155 in Tm3, arguing against off-target effects for this large knock-down effect (Figure S2). The  
156 opposing results in our experiments are consistent with other distinct processing properties of  
157 Mi1 and Tm3, including their differing adaptation to stimulus contrast (Matulis et al., 2020) and  
158 their opposite responses to behavioral arousal (Strother et al., 2018). These experiments  
159 demonstrate that wildtype *slo* expression is required for both Mi1 and Tm3 wildtype dynamics,  
160 while the specific effect of manipulating *slo* expression appears to depend on the complement of  
161 channels expressed in the cell. Parallel experiments where the bacterial voltage-gated Na<sup>+</sup>  
162 channel NaChBac (Nitabach et al., 2006) was expressed in either Mi1 or Tm3 cells also resulted  
163 in opposite changes in the dynamics of the two cell types (Figure S3). The changes in Mi1 and  
164 Tm3 dynamics were present in both dendrites and axon terminals, suggesting that they impact  
165 early stages of cellular processing (Figure S4).

166  
167 To investigate whether these genetic manipulations affected membrane potential dynamics, we  
168 measured Mi1 and Tm3 voltage responses using ArcLight (Jin et al., 2012) while using the  
169 manipulations that elicited the largest effects we observed with calcium indicators. Expressing  
170 *slo*-RNAi in Tm3 and NaChBac in Mi1 sped up each cell's membrane potential response,  
171 consistent with our calcium measurements (Figure S5). This suite of manipulations in Mi1 and  
172 Tm3 cells did not strongly affect calcium response nonlinearities or filter amplitudes (Figure S6),  
173 suggesting that these manipulations do not strongly alter the basal physiological state of these  
174 neurons.

175  
176 Next, we set out to manipulate the dynamics of the inhibitory neurons Mi4 and CT1. Mi4 has  
177 been anatomically (Takemura et al., 2013, 2017) and functionally (Strother et al., 2017) linked to  
178 T4, with other studies supporting its putative role as a delayed inhibitory input (Arenz et al.,  
179 2017; Gruntman et al., 2018). On the other hand, the role of CT1, an amacrine cell, in motion  
180 detection remains unknown, despite its shared characteristics with Mi4: it releases the inhibitory  
181 neurotransmitter GABA (Takemura et al., 2017), responds to local contrast increments (Meier  
182 and Borst, 2019), and synapses onto T4 with an anatomy that parallels Mi4 (Shinomiya et al.,  
183 2019). Due to the putative roles of Mi4 and CT1 as delayed inhibitory inputs, we sought to speed  
184 up their dynamics to determine how each cell type's timing impacts T4 tuning.



185  
186 Since *slo* over-expression and knock-down had opposite effects in Mi1 and Tm3, we used an  
187 alternative genetic manipulation that had the same effect on the dynamics of these two cell types.  
188 Knocking-down *cacophony* (*cac*), the voltage-gated Ca<sup>2+</sup>  $\alpha$ 1 channel subunit, sped up both Mi1  
189 and Tm3 filter dynamics (Figure S7). Similarly, when we used RNAi to knock-down *cac* in Mi4  
190 and CT1, it made their responses significantly faster (Figures 3A-B). *Cac* knock-down in CT1  
191 sped up its filter dynamics at terminals in both the medulla (Figures 3C-D) and the lobula (Figure  
192 S8). With this manipulation, the filter amplitudes of both Mi4 and CT1 responses were  
193 decreased, consistent with previous data using a gene excision method (Figure S6) (Fisher et al.,  
194 2017), but their nonlinearities showed relatively little change (Figure S6). These results  
195 demonstrate that *cac* expression is required to maintain Mi1, Tm3, Mi4, and CT1 wildtype  
196 calcium dynamics.

197  
198 *Excitatory and inhibitory input dynamics regulate T4 tuning to motion velocity*

199  
200 It is not surprising that manipulating membrane ion channel expression can alter response  
201 dynamics, but these manipulations enable us to interrogate how input dynamics drive  
202 downstream neural signals. We used these tools to investigate how T4 responses are determined  
203 by the dynamics of its excitatory and inhibitory inputs. To do this, we sped up or slowed down  
204 the dynamics of these inputs by expressing *slo*, *slo*-RNAi, or *cac*-RNAi, all while recording  
205 calcium responses in T4 cells (Figure 4-5). To measure the velocity tuning of T4, we presented  
206 periodic, white bars that rotated about the fly at different velocities (Figure 4A), and then  
207 compared T4 velocity sensitivity between manipulated conditions and controls. We recorded  
208 responses in T4 axons that responded to horizontal motion, and then combined responses across  
209 different preferred directions (PD) (Salazar-Gatzimas et al., 2016, 2018). As expected, T4 cells  
210 showed strong DS responses across the different velocities (Figure 4B). We plotted the tuning  
211 curve of each fly by averaging the responses over the 5 second presentation of each velocity  
212 (Figure 4C). These tuning curves peaked at around 32°/s. To summarize the speed tuning of these  
213 responses, we computed a response-weighted average that defines the curve's center of mass on  
214 a log-velocity scale (Figure 4D, see Methods).

215  
216 We began by assessing the impact of Mi1 and Tm3 dynamics on T4 velocity tuning. If these two  
217 excitatory inputs serve as the non-delay inputs to T4 (Shinomiya et al., 2019), then speeding  
218 them up should lengthen relative delays in the circuit. The textbook model of circuit delays  
219 would predict that this should result in downstream motion signals that prefer slower stimuli  
220 (Figure 1A). To test this prediction, we sped up Mi1 dynamics by over-expressing *slo* (Figures  
221 2A-B), and measured T4 responses. With this manipulation, we observed an increase in T4  
222 sensitivity to bars moving at high speeds and a shift of the curve's center of mass to higher  
223 velocities (Figures 4E-F). This change was opposite the prediction of the textbook model of  
224 circuit delays for motion detection. Conversely, slowing Mi1 by knocking-down *slo*, caused a  
225 small but significant decrease in sensitivity to high velocities (Figures 4G-H). The downstream  
226 consequences of manipulations to Tm3 dynamics paralleled those caused by altering Mi1  
227 dynamics. When Tm3 was slowed down by *slo* over-expression, T4's sensitivity to high  
228 velocities was reduced and the tuning curve's center of mass shifted to slower velocities (Figures  
229 4I-J). Likewise, when Tm3 dynamics were sped up by expressing *slo*-RNAi, T4 cells were  
230 significantly more sensitive to bars moving at high speeds (i.e., 64°/s-512°/s) (Figures 4K-L). In

231 some cases, genetic manipulation of Mi1 and Tm3 altered T4 response amplitudes to the PD, but  
232 not to the null direction (ND) (Figure S9). In sum, speeding up or slowing down Mi1 or Tm3—  
233 two excitatory inputs—impacts T4 in a consistent fashion, but not as predicted by the textbook,  
234 delay-based model for motion detection.

235  
236 We next assessed how altering the dynamics of the inhibitory inputs Mi4 and CT1—putative  
237 delay lines—affected T4 velocity tuning. Again, according to the textbook model for motion  
238 detection, making the delayed line faster should result in shorter relative delays, rendering the  
239 downstream motion detector more responsive to faster stimuli (Figure 1A). Therefore, we  
240 hypothesized that speeding up Mi4 or CT1 would result in T4 neurons that were more sensitive  
241 to faster velocities. Surprisingly, when we sped up Mi4 and CT1 by knocking down *cac*, we  
242 observed a significant increase in T4's sensitivity to slower velocities (Figure 5A-D),  
243 contradicting the predictions of a simple, textbook model. CT1 has been anatomically implicated  
244 in T4 motion detection (Takemura et al., 2017) and it compartmentalizes signals that could  
245 potentially support local motion detection (Meier and Borst, 2019). However, there has been no  
246 functional evidence for its involvement. Our results show that the dynamics of CT1 are required  
247 for the tuning of T4. As with manipulations of Mi1 and Tm3, manipulating Mi4 and CT1  
248 response dynamics did not substantially change T4 PD and ND response amplitudes (Figure S9).  
249 Interestingly, silencing Mi4 or CT1 with tetanus toxin did not result in changes in T4 tuning  
250 (Figure S10). This suggests that manipulating dynamics can reveal roles that are difficult to find  
251 using silencing experiments. In sum, these experiments show that speeding up Mi4 and CT1  
252 responses significantly altered T4 velocity tuning in a similar fashion.

253  
254 We wanted to test whether the tuning changes we observed in T4 were transmitted downstream  
255 to guide direction-selective behaviors in the fly. Therefore, we measured optomotor turning  
256 responses to the periodic, white bar stimulus we used to probe T4 tuning. We manipulated CT1  
257 because it synapses onto both T4 and T5 neurons, which are both likely to be activated by our  
258 periodic stimulus. We hypothesized that expressing *cac*-RNAi in CT1 neurons would result in  
259 behavioral tuning changes matching the changes we observed in T4. Indeed, flies expressing  
260 *cac*-RNAi in CT1 were more sensitive to bars moving at lower velocities (Figure S11). These  
261 results reveal that (1) the tuning of T4 is transmitted to modulate fly turning behavior and (2)  
262 CT1 dynamics maintain native tuning to stimulus velocity in optomotor behavior.

263  
264 *A data-driven model with parallel, delayed inhibitory inputs reproduces T4 velocity tuning*

265  
266 The simple, textbook model of circuit delays did not predict how altering the dynamics of  
267 excitatory (Mi1/Tm3) or inhibitory (Mi4/CT1) inputs changed T4 tuning. To better understand  
268 how the dynamical processing properties of these upstream neurons affects T4 responses, we  
269 compared our measurements to an anatomically-constrained synaptic model that incorporated the  
270 measured temporal filtering properties of the input neurons (Figure 6) (Badwan et al., 2019;  
271 Borst, 2018; Zavatone-Veth et al., 2020). This model consists of three, spatially-separated inputs  
272 that apply linear-nonlinear transformations to local visual signals (Zavatone-Veth et al., 2020). In  
273 this model, a central excitatory Mi1/Tm3-like ON input is flanked by an Mi9-like ND-offset  
274 OFF inhibitory input, and an Mi4-like PD-offset ON inhibitory input—all consistent with  
275 previous anatomical and functional data (Arenz et al., 2017; Gruntman et al., 2018; Strother et  
276 al., 2017; Takemura et al., 2017). We asked how this model responded to the periodic white bar

277 stimulus used in T4 measurements (Figures 4-5 and 6A). To obtain data-driven filters for the  
278 inputs to this model, we first de-convolved calcium indicator dynamics from experimentally  
279 measured filters and then generated smooth filters by fitting with a parametric model (Figure 6B  
280 and S12, see Methods).

281  
282 To test how the excitatory Mi1 and Tm3 dynamics might alter tuning of T4 neurons in this  
283 model, we set up Mi1 and Tm3 as parallel linear-nonlinear synaptic inputs to T4 with a shared,  
284 central spatial receptive field (Figure 6C), again consistent with anatomical data (Takemura et  
285 al., 2017). Using these data-driven filters, we computed the model's mean response to our  
286 periodic white bar stimulus rotating at different velocities (Figure 6D). The model's PD response  
287 center of mass was  $\sim 32^\circ/\text{s}$ , while its response to ND-moving bars was  $\sim 1/4$  the amplitude of its  
288 PD response, both comparable to experimental measurements of T4 (Figure 4-5 and S9). Next,  
289 we simulated the model's response when the Mi1 input used the data-driven filters for the  
290 experiments in which Mi1 expressed *slo* or *slo*-RNAi (Figure 6E). In the model, the faster  
291 dynamics of the Mi1 > *slo* filter shifted the model's sensitivity toward faster velocities, while  
292 Mi1 > *slo*-RNAi filter shifted the sensitivity to slower velocities (Figure 6F), matching our  
293 experimental observations (Figure 4E-H). Similarly, the data-driven Tm3 > *slo* and Tm3 > *slo*-  
294 RNAi filters (Figure 6G) shifted the model's sensitivity to slower and faster velocities,  
295 respectively (Figure 6H), also in agreement with our experiments (Figure 4I-L). These  
296 simulations make clear that the peak delay timing is not sufficient to qualitatively describe tuning  
297 changes; instead, the full bandpass properties of the filters are necessary to understand tuning of  
298 downstream motion detectors. When Mi1 and Tm3 become faster, they also pass more signal at  
299 high frequencies, resulting in the shift in tuning to higher velocities. This explanation is  
300 consistent with theoretical analyses of the simple Hassenstein-Reichardt correlator model  
301 (Egelhaaf and Borst, 1989; Reichardt, 1961), but these have never been directly tested. In all,  
302 these simulations show that the measured changes in the linear filtering properties of in Mi1 and  
303 Tm3 are sufficient to explain the consequent tuning changes measured in T4.

304  
305 Next, we tested whether this model could explain our results when we manipulated the inhibitory  
306 Mi4 and CT1 input dynamics. When we substituted the Mi4 input with the Mi4 > *cac*-RNAi  
307 data-driven filter (Figure 6I), the model's direction preference reversed, so that the response to  
308 periodic white bars moving in the former ND was *greater* than the response to those in the  
309 former PD (Figure 6J). This happened because the manipulated Mi4 delay line responds faster  
310 than the non-delay Mi1/Tm3 line. This simulation result is not supported by our experimental  
311 findings (Figure 4-5 and S13). We also asked whether the model could predict changes in T4  
312 tuning if CT1, rather than Mi4, acted as the model's delayed inhibitory input (Figures 6L-L).  
313 Exchanging the data-driven CT1 filter with that of CT1 > *cac*-RNAi (Figure 6K) also caused the  
314 model to reverse its direction preference (Figure 6L), a result similar to the Mi4 result and  
315 inconsistent with our T4 measurements of this manipulation (Figure 5).

316  
317 These two failures of the initial model caused us to revise it. We created a new model in which  
318 Mi4 and CT1 both act as parallel, delayed, inhibitory inputs sharing the same spatial receptive  
319 field (Figure 6M), a proposal consistent with anatomy (Takemura et al., 2017). Using data-driven  
320 filters, this model architecture produced a velocity tuning curve that qualitatively resembled that  
321 of the previous model (Figure 6N). Similarly, adding the parallel, delayed inhibitory input did  
322 not change the model's response to perturbations of the Mi1 or Tm3 inputs (using the data-

323 driven filters corresponding to wildtype, *slo* over-expression, and *slo*-RNAi expression) (Figure  
324 6O-P). However, in this model, when we exchanged the Mi4 or CT1 wildtype filters with the  
325 data-driven filters for Mi4 > *cac*-RNAi (Figure 6I) or CT1 > *cac*-RNAi (Figure 6K), the model's  
326 direction preference remained intact (Figure 6Q-R). In the case of Mi4 > *cac*-RNAi, the model's  
327 sensitivity shifted towards slower moving bars (Figure 6Q). In the case of CT1 > *cac*-RNAi,  
328 there was a similar shift in the sensitivity towards lower velocities (Figure 6R). Both cases  
329 matched the changes observed in T4 tuning (Figures 5A-B and 5C-D). Therefore, this revised  
330 synaptic model is sufficient to account for the changes in tuning of T4 when inhibitory Mi4 and  
331 CT1 dynamics are altered.

332  
333 These results did not depend strongly on the details of the model. For instance, tuning shifts  
334 remained consistent when we replaced the data-driven filters with synthetic high- and low-pass  
335 filters (Figure S14). Our manipulations of Mi4 and CT1 both sped up the filters and also reduced  
336 their amplitudes (Figures 3A-D and S6), but simulations including both effects roughly matched  
337 those in which we altered only the filtering dynamics (Figure S15). In contrast, including only  
338 the reduction in amplitude in Mi4 or CT1, without the change in dynamics, resulted in tuning  
339 changes in T4 that were in the opposite direction of what we observed experimentally (Figure  
340 S15).

## 341 342 **Discussion**

343  
344 Overall, this research provides causal evidence for how the dynamics of four known input  
345 interneurons to T4—Mi1, Tm3, Mi4, and CT1—influence motion computation. First, we showed  
346 that ion channel expression levels regulate neural response dynamics. Specifically, we identified  
347 two membrane ion channels whose expression is required for the wildtype dynamics of various  
348 cell types. Next, we showed that manipulating the dynamics of single inputs alters T4 velocity  
349 tuning. The response dynamics of excitatory and inhibitory neuron types are combined to jointly  
350 tune T4 sensitivity to different velocities. These experimental observations of T4 tuning under  
351 different input manipulations are not explained by textbook models of motion detection that  
352 consider only the delays of inputs. Instead, the full, filtering properties of the filters are necessary  
353 to predict our experimental results. Finally, we showed that a data-constrained synaptic model  
354 for T4 reproduces our findings only when two delayed inhibitory inputs from Mi4 and CT1 are  
355 in parallel.

356  
357 *Neurons can control their response dynamics by regulating ion channel expression*

358  
359 Studies have suggested many properties by which networks of neurons may regulate their  
360 processing dynamics, from conduction delays (Egger et al., 2020) and synaptic dynamics (Alabi  
361 and Tsien, 2012) to feedback and lateral circuit interactions (Drinnenberg et al., 2018). Our  
362 findings highlight how active membrane channel expression controls cellular response dynamics,  
363 and in turn regulate how circuit computations are tuned. In particular, we identified two ion  
364 channels—*slowpoke* and *cacophony*—that are critical to maintaining the native response  
365 dynamics of four input interneurons in the fly's motion detection circuit (Figure 2-3 and S7). The  
366 four input interneurons we studied—Mi1, Tm3, Mi4, and CT1—use membrane channel  
367 expression to impose additional delays in signals and control their dynamics (Figure 2-3). It is  
368 not surprising that manipulating ion channel expression affects neural dynamics. In fact, ion



369 channel expression has been shown to regulate neural dynamics in other *Drosophila* studies  
370 (Groschner et al., 2018; Gür et al., 2020), as well as with some timing mechanisms in vertebrate  
371 motor control circuits, which can rely on axonal conductance properties to coordinate activity  
372 (Egger et al., 2020). However, the method we used in this study to manipulate the dynamics of  
373 *individual* neuron types is a powerful tool for manipulating and dissecting circuit function. For  
374 neurons and circuits, regulating ion channel expression provides a flexible way to control their  
375 dynamics and circuit computations.

376  
377 Neurons and circuits have homeostatic mechanisms that regulate membrane channel expression  
378 to ensure stable network function (Marder and Goaillard, 2006). Moreover, there are likely many  
379 channel expression patterns in a cell that could achieve similar response dynamics (Prinz et al.,  
380 2004). The interneurons we manipulated here are potentially under homeostatic control (Davis,  
381 2006), yet our experiments successfully manipulated their dynamics. This suggests that  
382 homeostatic regulation is imperfect in these cells, as it relates to response dynamics, or that the  
383 dynamics are not being actively controlled by homeostatic mechanisms. The possibility of  
384 homeostatic regulation also warrants some caution in interpreting results: the misexpression of  
385 certain genes creates phenotypes in response dynamics, but those gene products are not  
386 necessarily the channels responsible for altering neural dynamics, since many channels could  
387 change in abundance or function. The opposite, bidirectional effects of manipulating *slo* in Mi1  
388 and Tm3 also make it probable that dynamics are controlled by a complex interplay of channels  
389 that are different between these two neurons. The differences observed in Mi1 and Tm3  
390 responses to *slo* manipulations are also consistent with experimental findings in vertebrates,  
391 where manipulating a potassium channel may either increase or decrease excitability, depending  
392 on the neuron type (Quraishi et al., 2019; Yang et al., 2007).

393  
394 Manipulating cellular expression patterns to alter neural dynamics offers a circuit dissection tool  
395 that complements genetically encoded silencing methods, which have served as a primary tool  
396 for understanding circuit function (Luo et al., 2018). Interestingly, these manipulations revealed  
397 roles for Mi4 and CT1 in tuning motion detection that silencing did not (Figure 5 and S10). By  
398 altering neural properties but not silencing the neurons, these experiments act somewhat like  
399 activation experiments. That is, they alter neural activity as a function of on-going responses, and  
400 show that this changed activity is sufficient to affect different properties of the circuit.

401  
402 *Excitatory and inhibitory input dynamics jointly control velocity sensitivity*

403  
404 In this research, we developed a protocol that allowed us to genetically manipulate individual  
405 inputs to T4 while simultaneously measuring the impact on T4 velocity tuning. Using this  
406 protocol, we demonstrated how perturbing the dynamics of Mi1, Tm3, Mi4, and CT1 each  
407 changed T4 sensitivity to stimulus velocity (Figure 4-5). Thus, this work reveals that each of  
408 these neuron types *individually* contributes to tuning velocity sensitivity in T4, while the  
409 dynamics of both excitatory and inhibitory inputs *jointly* control the tuning of T4. Moreover,  
410 although prior work has suggested that the amacrine cell CT1 could be involved in T4 function  
411 (Meier and Borst, 2019; Shinomiya et al., 2019; Takemura et al., 2017), our results demonstrate  
412 that its responses tune T4 motion detection. Last, T4 and T5 are required for rotational  
413 optomotor behaviors (Maisak et al., 2013), but it remained unknown how their tuning



414 contributed to behavioral responses. Our manipulations showed that behavioral tuning changed  
415 in the same direction as T4 tuning (Figure S11).

416  
417 The control of motion detector tuning by both excitatory and inhibitory dynamics may extend to  
418 motion detection circuits in mouse and other vertebrates. For instance, in mouse, both starburst  
419 and amacrine cells, as well as cortical DS cells, receive excitatory inputs with differential delays  
420 (Baden et al., 2013; Kim et al., 2014; Lien and Scanziani, 2018). These delays appear critical to  
421 direction-selectivity and could be, in part, generated by differential expression of active ion  
422 channels. Moreover, starburst and cortical cells receive direct and indirect inhibition from  
423 neighboring cells, and our results suggest that the dynamics of this inhibition could tune the  
424 velocity sensitivity of these cells. Last, DS retinal ganglion cells receive excitatory inputs from  
425 bipolar cells and directional inhibition from starburst cells (Demb and Singer, 2015). Our results  
426 suggest that the dynamics of *both* the excitation and the inhibition control the sensitivity of these  
427 cells to velocity.

428  
429 *Manipulating single-neuron-type response dynamics to constrain circuit models*

430  
431 Our genetic manipulations of Mi1, Tm3, Mi4, and CT1 while recording T4 provide sensitive  
432 tests of models for motion detection in *Drosophila*. Our experimental and theoretical results  
433 (Figure 3-6) suggest that the excitatory and inhibitory interneurons tested play redundant roles in  
434 T4 tuning. This redundancy is consistent with neural anatomy, in which these two pairs of  
435 neurons receive input from similar points in space (Takemura et al., 2017). The redundancy is  
436 also consistent with the result that T4 largely maintains direction-selectivity even when its inputs  
437 are individually silenced (Strother et al., 2017). In addition, our data establish that the tuning of  
438 local motion detectors cannot be predicted by examining relative delays alone. Rather, our model  
439 suggests that it depends on detailed linear filtering properties of input neurons (Figure 4-5)—a  
440 hitherto untested theoretical result (Egelhaaf and Borst, 1989; Reichardt, 1961). The circuit  
441 simulations suggest that, although this circuit has many feedback and lateral connections  
442 (Takemura et al., 2013, 2017), a feedforward synaptic model can reproduce the tuning properties  
443 resulting from our manipulations of input dynamics.

444  
445 Previous work has shown that modulating channel expression can determine network dynamics  
446 (Schulz et al., 2006), but this work shows how changes in channel expression in single neuron  
447 types can influence neural computation. More generally, because neural circuits ubiquitously  
448 integrate excitatory and inhibitory inputs, our results show how the dynamical responses of  
449 neural inputs are critical to understanding circuit computations. Beyond vision and motion  
450 detection, dynamics are central to many neural computations. For example, in auditory systems,  
451 interaural timing is crucial to localizing sounds (Grothe et al., 2010; Jeffress, 1948; Knudsen and  
452 Konishi, 1978, 1979), while in olfactory systems, the dynamics of odor responses facilitates odor  
453 discrimination (Laurent, 2002; Mazor and Laurent, 2005). Learning and synaptic plasticity also  
454 rely on the relative timing of neural activity (Dan and Poo, 2004), and motor control depends on  
455 the precise relative timing of neural signals (Churchland et al., 2012; Long et al., 2010). It will be  
456 interesting to investigate how the response timing of individual neurons in these systems drives  
457 circuit responses, and how response timing itself is influenced by the complement of membrane  
458 ion channels. Our results emphasize how expression of active channels in single excitatory and  
459 inhibitory neuron types can tailor neural computations in broader circuits.

460 **Materials and Methods**

461

462 *Fly Strains and Husbandry*

463 Non-virgin female flies, grown on dextrose-based food, were used for all experiments. All flies  
464 were staged on CO<sub>2</sub> 12-24 hours after eclosion, and recordings were performed between 24 and  
465 48 hours after staging. Both experimental and control flies used for imaging experiments were  
466 grown in incubators set to 25°C. All genotypes used are listed in **Table S1**, parental strains are  
467 listed in **Table S2**.

468

469 **Table S1.** Experimental Genotypes

| Abbreviation                        | Genotype                                                            |
|-------------------------------------|---------------------------------------------------------------------|
| Mi1 > GC6f                          | +; UAS-GCaMP6f/+; R19F01-Gal4/+                                     |
| Mi1 > GC6f, <i>slo</i>              | w, UAS- <i>slo</i> /+; UAS-GCaMP6f /+; R19F01-Gal4/+                |
| Mi1 > GC6f, NaChBac                 | w/+; UAS-GCaMP6f /+; R19F01-Gal4/UAS-NaChBac                        |
| Mi1 > GC6f, <i>slo</i> -RNAi        | +; UAS-GCaMP6f/UAS- <i>slo</i> -RNAi; R19F01-Gal4/+                 |
| Mi1 > GC6f, <i>GluClal</i> -RNAi    | +; UAS-GCaMP6f/UAS- <i>GluClal</i> -RNAi; R19F01-Gal4/UAS-Dcr-2     |
| Mi1 > GC6f, <i>nAchRa1</i> -RNAi    | w/+; UAS-GCaMP6f/UAS- <i>nAchRa1</i> -RNAi; R19F01-Gal4/+           |
| Mi1 > GC6f, <i>para</i> -RNAi       | w/+; UAS-GCaMP6f/+; R19F01-Gal4/ <i>para</i> -RNAi                  |
| Mi1 > GC6f, <i>Sh</i> -DN           | w/+; UAS-GCaMP6f/UAS- <i>Sh</i> -DN; R19F01-Gal4/+                  |
| Mi1 > GC6f, <i>eag</i> -DN          | w/+; UAS-GCaMP6f/UAS- <i>eag</i> -DN; R19F01-Gal4/+                 |
| Tm3 > GC6f                          | +; UAS-GCaMP6f /+; R13E12-Gal4/+                                    |
| Tm3 > GC6f, <i>slo</i>              | w, UAS- <i>slo</i> /+; UAS-GCaMP6f /+; R23E12-Gal4/+                |
| Tm3 > GC6f, NaChBac                 | w/+; UAS-GCaMP6f /+; R13E12-Gal4/UAS-NaChBac                        |
| Tm3 > GC6f, <i>slo</i> -RNAi        | +; UAS-GCaMP6f/UAS- <i>slo</i> -RNAi; R13E12-Gal4/+                 |
| Mi4 > GC6f                          | w/+; UAS-GCaMP6f /R48A07-AD; R79H02-DBD/+                           |
| Mi4 > GC6f, <i>cac</i> -RNAi        | w/+; UAS-GCaMP6f/R48A07-AD; R79H02-DBD/UAS- <i>cac</i> -RNAi        |
| CT1 > GC6f                          | w/+; UAS-GCaMP6f/R65E11-AD; R20C09-DBD/+                            |
| CT1 > GC6f, <i>cac</i> -RNAi        | w/+; UAS-GCaMP6f/R65E11-AD; R20C09-DBD/UAS- <i>cac</i> -RNAi        |
| Tm3 > GC6f, <i>slo</i> -RNAi (v2)   | +; UAS-GCaMP6f /UAS- <i>slo</i> -RNAi; R13E12-Gal4/+ (VDRC)         |
| Mi1 > ArcLD                         | +; UAS-Arclight/+; R19F01-Gal4/+                                    |
| Mi1 > ArcLD, NaChBac                | w/+; UAS-Arclight/+; R19F01-Gal4/UAS-NaChBac                        |
| Tm3 > ArcLD                         | +; UAS-Arclight/+; R13E12-Gal4/+                                    |
| Tm3 > ArcLD, <i>slo</i> -RNAi       | +; UAS-Arclight/UAS- <i>slo</i> -RNAi; R19F01-Gal4/+                |
| Mi1 > GC6f, <i>cac</i> -RNAi        | w/+; UAS-GCaMP6f /+; R19F01-Gal4/UAS- <i>cac</i> -RNAi              |
| Tm3 > GC6f, <i>cac</i> -RNAi        | w/+; UAS-GCaMP6f /+; R13E12-Gal4/UAS- <i>cac</i> -RNAi              |
| T4T5 > GC6f, Mi1/+                  | +; LexAOp-GCaMP6f, R42F06-LexA/+; R19F01-Gal4/+                     |
| T4T5 > GC6f, <i>slo</i> /+          | w, UAS- <i>slo</i> /+; LexAOp-GCaMP6f, R42F06-LexA/+; +             |
| T4T5 > GC6f, Mi1 > <i>slo</i>       | w, UAS- <i>slo</i> /+; LexAOp-GCaMP6f, R42F06-LexA/+; R19F01-Gal4/+ |
| T4T5 > GC6f, <i>slo</i> -RNAi/+     | +; LexAOp-GCaMP6f, R42F06-LexA/UAS- <i>slo</i> -RNAi; +             |
| T4T5 > GC6f, Mi1 > <i>slo</i> -RNAi | +; LexAOp-GCaMP6f, R42F06-LexA/UAS- <i>slo</i> -RNAi; R19F01-Gal4/+ |
| T4T5 > GC6f, Tm3/+                  | +; LexAOp-GCaMP6f, R42F06-LexA/+; R13E12-Gal4/+                     |
| T4T5 > GC6f, Tm3 > <i>slo</i>       | w, UAS- <i>slo</i> /+; LexAOp-GCaMP6f, R42F06-LexA/+; R13E12-Gal4/+ |
| T4T5 > GC6f, Tm3 > <i>slo</i> -RNAi | +; LexAOp-GCaMP6f, R42F06-LexA/UAS- <i>slo</i> -RNAi; R13E12-Gal4/+ |
| T4T5 > GC6f, Mi4/+                  | w/+; LexAOp-GCaMP6f, R42F06-LexA/R48A07-AD; R79H02-DBD /+           |

|                                     |                                                                                |
|-------------------------------------|--------------------------------------------------------------------------------|
| T4T5 > GC6f, <i>cac</i> -RNAi/+     | w/+; LexAOp-GCaMP6f, R42F06-LexA/ +; UAS- <i>cac</i> -RNAi/+                   |
| T4T5 > GC6f, Mi4 > <i>cac</i> -RNAi | w/+; LexAOp-GCaMP6f, R42F06-LexA/ R48A07-AD; R79H02-DBD /UAS- <i>cac</i> -RNAi |
| T4T5 > GC6f, CT1/+                  | w/+; LexAOp-GCaMP6f, R42F06-LexA/R65E11-AD; R20C09-DBD/+                       |
| T4T5 > GC6f, CT1 > <i>cac</i> -RNAi | w/+; LexAOp-GCaMP6f, R42F06-LexA/R65E11-AD; R20C09-DBD /UAS- <i>cac</i> -RNAi  |
| T4T5 > GC6f, TNT/+                  | w/+; LexAOp-GCaMP6f, R42F06-LexA/UAS-TNT; +                                    |
| T4T5 > GC6f, Mi4 > TNT              | w/+; LexAOp-GCaMP6f, R42F06-LexA/ R48A07-AD; R79H02-DBD /UAS-TNT               |
| T4T5 > GC6f, CT1 > TNT              | w/+; LexAOp-GCaMP6f, R42F06-LexA/R65E11-AD; R20C09-DBD /UAS-TNT                |
| Mi9 > GC6f                          | w/+; UAS- GCaMP6f /R48A07-AD; VT046779-DBD/+                                   |
| T4T5/+                              | +; R42F06-Gal4; +                                                              |
| TNT/+                               | w/+; UAS-TNT/+; +                                                              |
| T4T5 > TNT                          | w/+; R42F06-Gal4/UAS-TNT; +                                                    |

470

471

**Table S2.** Parental Strains

| Genotype                                                              | Identifier                                                                       | Source                                                |
|-----------------------------------------------------------------------|----------------------------------------------------------------------------------|-------------------------------------------------------|
| <i>D. melanogaster</i> Mi1: +; +; R19F01-Gal4                         | 48852                                                                            | [(Strother et al., 2014)]; BDSC                       |
| <i>D. melanogaster</i> Mi4: +; R48A07-AD; R79H02-DBD                  | SS00316                                                                          | [(Strother et al., 2017)]; BDSC                       |
| <i>D. melanogaster</i> Tm3: +; +; R13E12-Gal4                         | 48569                                                                            | [(Behnia et al., 2014)]; BDSC                         |
| <i>D. melanogaster</i> GCaMP6f: +; UAS-GC6f; +                        | 42747                                                                            | [(Chen et al., 2013)]; BDSC                           |
| <i>D. melanogaster</i> T4T5: +; R42F06-LexA; +                        | 54203                                                                            | BDSC                                                  |
| <i>D. melanogaster</i> GCaMP6f: +; LexAOp-GC6f; +                     | 44277                                                                            | BDSC                                                  |
| <i>D. melanogaster</i> TNT: +; UAS-TNT; +                             | 28838                                                                            | [(Sweeney et al., 1995)]; BDSC                        |
| <i>D. melanogaster slo</i> -RNAi: +; UAS- <i>slo</i> -RNAi (TRiP)     | 55405                                                                            | [(Perkins et al., 2015)]; BDSC                        |
| <i>D. melanogaster slo</i> -RNAi v2: +; UAS- <i>slo</i> -RNAi         | 104421                                                                           | [(Dietzl et al., 2007)]; VDRC                         |
| <i>D. melanogaster slo</i> : w, UAS- <i>slo</i> ; +; +                | Gift from Dr. N. S. Atkinson, The University of Texas at Austin, Austin, TX, USA | [(Nitabach et al., 2006)]                             |
| <i>D. melanogaster</i> NaChBac: w; UAS-NaChBac                        | 9468                                                                             | [(Nitabach et al., 2006; Shafer and Yao, 2014)]; BDSC |
| <i>D. melanogaster cac</i> -RNAi: yv; UAS- <i>cac</i> -RNAi           | 27244                                                                            | [(Perkins et al., 2015)]; BDSC                        |
| <i>D. melanogaster GluClal</i> -RNAi: +; UAS- <i>GluClal</i> -RNAi    | 105754                                                                           | [(Dietzl et al., 2007)]; VDRC                         |
| <i>D. melanogaster</i> UAS-Dcr-2: w; +; UAS-Dcr-2                     | 24651                                                                            | [(Hartwig et al., 2008)]; BDSC                        |
| <i>D. melanogaster nAchRal</i> -RNAi: +; +; UAS- <i>nAchRal</i> -RNAi | 28688                                                                            | [(Perkins et al., 2015)]; BDSC                        |

|                                                                 |                                                                    |                                |
|-----------------------------------------------------------------|--------------------------------------------------------------------|--------------------------------|
| <i>D. melanogaster para</i> -RNAi: +; +; UAS- <i>para</i> -RNAi | 33923                                                              | [(Perkins et al., 2015)]; BDSC |
| <i>D. melanogaster Sh</i> -DN: w; UAS- <i>Sh</i> -DN            | Gift from Dr. Haig Keshishian, Yale University, New Haven, CT, USA | [(Gisselmann et al., 1989)]    |
| <i>D. melanogaster eag</i> -DN: w; UAS- <i>eag</i> -DN          | 8187                                                               | [(Hartwig et al., 2008)]; BDSC |
| <i>D. melanogaster</i> ArcLight: w; UAS-ArcLight/CyO            | 51057                                                              | BDSC                           |
| <i>D. melanogaster</i> CT1: w; R65E11-AD; R20C09-DBD            | SS01001                                                            | [(Takemura et al., 2017)]      |
| <i>D. melanogaster</i> Mi9: w; R48A07-AD; VT046779-DBD          | SS00316                                                            | [(Strother et al., 2017)]      |

472

473 *Visual stimuli*

474 Stimuli for imaging experiments were generated using custom code written in Matlab (The  
 475 MathWorks, Natick, MA) and PsychToolBox (Brainard, 1997; Kleiner et al., 2007; Pelli, 1997).  
 476 Both were projected with digital light projectors (Texas Instruments) onto panoramic screens  
 477 surrounding the fly as described previously (Creamer et al., 2019). Stimulus frames were  
 478 presented at an update rate of 180 Hz, and stimuli were presented in green light with a mean  
 479 intensity of  $\sim 100$  cd/m<sup>2</sup>. To minimize stimulus bleed-through onto microscope photomultiplier  
 480 tubes (PMTs), the projector light was filtered with two 565/24 (centers/FWHM) filters in series  
 481 (Semrock, Rochester, NY, USA). All visual stimuli presented in the experiments are listed in  
 482 **Table S3**.

483

484 **Table S3.** Visual Stimuli

| Name                                                                               | Description                                                                                                                                                                                                                                                     | Figure(s)          |
|------------------------------------------------------------------------------------|-----------------------------------------------------------------------------------------------------------------------------------------------------------------------------------------------------------------------------------------------------------------|--------------------|
| Full Field Flicker with contrast sections (30 Hz for GCaMP6f kernel extraction)    | Full-field flicker updated stochastically at 30 Hz, with 0.9 contrast and durations of 5 seconds. A 15s snippet of identical stimulus was repeated each minute during the stimulus.                                                                             | 1-3, S1-4, S6-8    |
| Periodic White Bars Sweep (tuning measurements in T4)                              | Periodic white, 5° bars, on a black background, spaced every 30° sweep to the right or left at random velocity epochs (8, 16, 32, 64, 128, 256, and 512°/s). Each velocity epoch lasted 5 seconds.                                                              | 4-5, S9-11, S13-15 |
| Full Field Flicker with Contrast Sections (120 Hz for ArcLight Kernel Extractions) | Same stochastic stimulus as described above with two differences: 1) the full-field flicker updated stochastically at 120 Hz rather than 30 Hz and 2) the high contrast flicker was shown constantly for 5 seconds.                                             | S5                 |
| Rotating Sinewave Gratings (180 Hz for UAS-TNT control)                            | 25% contrast sinewaves with $\lambda = 30^\circ$ , updating at 180 Hz rotated right or left at randomly interleaved temporal frequencies (0.25, 0.375, 0.5, 0.75, 1, 1.5, 2, 3, 4, 6, 8, 12, 16, 24, and 32 Hz). Each temporal frequency epoch lasted 1 second. | S10                |
| <b>Selection Probes</b>                                                            |                                                                                                                                                                                                                                                                 |                    |

|                                                                        |                                                                                                                                      |                 |
|------------------------------------------------------------------------|--------------------------------------------------------------------------------------------------------------------------------------|-----------------|
| Moving Square Wave (selection probe for T4)                            | Full-contrast, square waves with 30° periods moving in towards the right, left, up, or down at 30°/s.                                | 4-5, S9-10      |
| Moving Edges (selection probe for T4)                                  | White edges moving left or right on a black background at 30°/s and black edges moving left or right on a white background at 30°/s. | 4-5, S9-10      |
| Full Field Flash (ON-OFF, selection probe for Mi1, Tm3, Mi4, and CT1)) | Alternating full-field black or white with each luminance lasting for 2 seconds.                                                     | 1-3, S1-4, S6-8 |
| Full Field Flash (ON-OFF, selection probe for ArcLD)                   | Same stimulus as described above, but with 250 ms presentations, rather than 2s.                                                     | S5              |
| Moving Bar (selection probe for Mi1, Tm3, Mi4, and CT1)                | White, 10°-wide bar moving in four cardinal directions (i.e., right, left, up, and down) at 30°/s on a black background.             | 1-3, S1-4, S6-8 |

485

486 *Two-Photon Imaging Protocol*

487 Fluorescent activity of labelled neurons was recorded using two-photon scanning fluorescence  
488 microscopy. Flies were anesthetized on ice and mounted onto stainless steel shim holders. Using  
489 UV-cured epoxy, we fixed the anterior rim of their heads to the holder. We surgically removed  
490 the posterior cuticle and trachea of the right or left eye. The flies' brains were covered by  
491 oxygenated sugar-saline solution (Wilson et al., 2004). The metal holder was placed above a box  
492 of panoramic screens (Creamer et al., 2019) under a Scientifica two-photon microscope. The  
493 panoramic screens onto which the visual stimuli were projected subtended 270° in azimuth and  
494 69° in elevation. Fluorophores were excited with a Spectra-Physics MaiTai eHP laser set to 930  
495 nm wavelength and with power at the sample less than or equal to ~30 mW. Using ScanImage  
496 (Pologruto et al., 2003), images were acquired at approximately 13 Hz. To prevent undesirable  
497 bleed-through from the visual stimulus, the input to the PMT was filtered with a 512/25 and a  
498 514/30 (center/FWHM) filter in series (Semrock, Rochester, NY, USA). All data were processed  
499 and analyzed using custom MATLAB code.

500

501 *Imaging Data Analysis: ROI Identification*

502 For Mi1, Tm3, Mi4, and CT1 recordings, regions of interest (ROIs) were identified by hand to  
503 encompass one neuron per ROI. For Mi1 recordings, layers M1, M5, and M9/10 were analyzed,  
504 while for Tm3, layers M1, M4/5, and M9/10 were analyzed. For Mi4 recordings, layers M2/3/4  
505 and M8/9 were analyzed. For CT1, terminals were recorded in the medulla M10 layer and in  
506 lobula layer L1. T4 axon terminals were recorded in the lobula plate, where we ran a watershed  
507 algorithm over the mean acquisition image to extract ROIs based on the baseline fluorescent  
508 intensity. For all, when low signal-to-noise ratio impeded identifying ROIs, we computed  
509 correlations in intensity over the movie between each pixel and its neighboring pixels, and used  
510 that 'correlation image' to define the boundaries of ROIs.

511

512 *Imaging Data Analysis: ROI Analysis*

513 For each ROI,  $\Delta F/F$  was computed with methods previously described (Salazar-Gatzimas et al.,  
514 2016). The baseline fluorescence  $F_0(t)$  for each ROI was computed by fitting a decaying



515 exponential to the ROI's time trace. When analyzing data where the stimuli contained interleaves  
 516 (periods of mean gray between stimuli), only responses occurring during the interleave periods  
 517 were fitted. Alternatively, with stimuli not containing interleaves, the complete time trace was  
 518 fitted to calculate a baseline fluorescence. For most of the data acquired, background subtraction  
 519 successfully eliminated low levels of bleed-through originating from the projector's stimulus  
 520 presentation. In cases of poor signal-to-noise recordings (particularly for the Arclight recordings  
 521 and CT1 kernel extractions), custom MATLAB software used a linear model for bleed-through  
 522 to subtract off contamination of the collected data. We calculated the fractional changes for each  
 523 ROI trace as  $\frac{\Delta F}{F} = \frac{F(t) - F_0(t)}{F_0(t)}$ .

524  
 525 *Imaging Data Analysis: ROI Selection*

526 Responsive ROIs were selected as described in previous work (Matulis et al., 2020). After  
 527 extracting each ROI and computing its  $\Delta F/F$ , we selected desirable ROIs based on their  
 528 responses to a probe stimulus—a stimulus independent of the testing stimulus that was presented  
 529 at the beginning and end of each recording. For recordings of Mi1, Tm3, Mi4, and CT1, selected  
 530 ROIs responded to a full-field flashes with a response of appropriate polarity, or to the white bar  
 531 moving in each of the four cardinal directions. For the full-field flash stimulus probe, we selected  
 532 ROIs with preferential responses to full-field ON flashes if recordings came from cells with ON-  
 533 center receptive fields (*i.e.*, Mi1, Tm3, Mi4, and CT1 medulla terminals). Alternatively, for cells  
 534 with OFF-center receptive fields (*i.e.*, CT1 lobula terminals), we selected ROIs with a  
 535 preferential response to full-field OFF flashes. For ROIs selected based on their responses to a  
 536 moving white bar, we based selection on the ROI's response to a minimum of two directions of  
 537 the moving bar. This white moving bar stimulus probe was used for selection in a subset of Mi1,  
 538 Tm3, and Mi4 recordings.

539  
 540 Selection of T4 ROIs was done using procedures previously described (Salazar-Gatzimas et al.,  
 541 2016, 2018). The stimulus probe for T4 recordings consisted of square waves moving right, left,  
 542 up, or down, as well as light and dark edges moving rightward or leftward. The single edges  
 543 section of the probe was used to determine direction selectivity indices (DSIs) and edge  
 544 selectivity indices (ESIs). We then selected ROIs that met the specific response threshold  
 545 previously indicated (*i.e.*,  $ESI > 0.3$ ,  $DSI > 0.4$  for the T4 progressive layer and  $DSI < -0.4$  for  
 546 T4 regressive layer). T4 ROIs in the progressive and regressive layers were selected if they met  
 547 the light vs. dark edge selectivity threshold.

548  
 549 *Filter extraction*

550 For recordings of Mi1, Tm3, Mi4, and CT1, linear filters were extracted to a binary, stochastic  
 551 white noise stimulus of 0.9 contrast. We used ordinary least squares (OLS) regression to  
 552 compute the linear filter that best predicted neural responses. Concretely, to compute the filter,  
 553 we solved the equation  $\mathbf{S}\mathbf{k} = \mathbf{r}$ , where  $\mathbf{r}$  is the response vector, and  $\mathbf{S}$  is a matrix of stimulus  
 554 contrasts that preceded each response. This used  $N$  pairs of stimulus-vectors and responses, as  
 555 follows:

556

$$\begin{bmatrix} s_t & s_{t-1} & \dots & s_{t-L} \\ s_{t+1} & s_t & & s_{t-L+1} \\ \vdots & & \ddots & \\ s_{t+N-1} & & & s_{t-L+N-1} \end{bmatrix} \cdot \begin{bmatrix} k_0 \\ k_1 \\ \vdots \\ k_L \end{bmatrix} = \begin{bmatrix} r_t \\ r_{t+1} \\ \vdots \\ r_{t+N-1} \end{bmatrix}$$

557 The stimulus and response values at a specific time  $t$  are  $s_t$  and  $r_t$ , respectively. The filter is  $L +$   
558 1 elements long, and  $k_i$  gives the filter's value at a specific time lag,  $i$ . We used standard  
559 methods in Matlab to solve this over-determined ordinary least square equation to obtain the best  
560 fit kernel  $\mathbf{k}$ . In the equations above, we included stimulus values that came after each response to  
561 obtain (acausal) kernel elements with negative lag times.

562

563 For Arclight kernels (Figure S5), we used a temporal super-resolution method that allowed us to  
564 extract the kernels with high resolution ( $\sim 120$  Hz) even while sampling responses at 13 frames  
565 per second (Mano et al., 2019).

566

567 As described previously, nonlinearities were computed by fitting each fly's response to a linear-  
568 nonlinear (LN) model (Matulis et al., 2020). In this model, the binary flickering stimulus was  
569 linearly filtered by the fitted kernel and then acted on by an instantaneous nonlinearity. To plot  
570 the nonlinearities, the linear prediction was plotted against the measured responses, with  
571 individual points binned by their linear prediction to determine a non-parametric nonlinearity.  
572 This nonlinearity represents the nonlinearity associated with the transformation of visual contrast  
573 to calcium (Yang et al., 2016) and the nonlinearity associated with our calcium indicator (Chen  
574 et al., 2013). In a LN model, if only the filter amplitude changes, then the plotted nonlinearities  
575 will lie on top of one another. These nonlinearities would be expected to change if, for instance,  
576 the basal calcium level in a cell changed under a manipulation.

577

578 To deconvolve linear calcium indicator dynamics from the filter, we assumed that the indicator  
579 acted as a first order low-pass filter with time constant of 250 ms (Chen et al., 2013). We then  
580 solved the same ordinary least squares equation above, except that we modeled the response as a  
581 first-order inhomogeneous recurrence relation with variable source:

$$582 \quad r_t = \alpha r_{t-1} + \sum_{j=0}^L k_j s_{t-j}.$$

583 We chose the parameter  $\alpha = \exp\left(-\frac{\Delta t}{\tau}\right) = 0.8$ , where  $\tau = 250$  ms is the filter time constant and  
584  $\Delta t = 70$ ms is our imaging measurement interval, which follows from comparing the formal  
585 solution to this recurrence to its analog in continuous time. This changed the equation above to  
586 read:

$$587 \quad \begin{bmatrix} s_t & s_{t-1} & \dots & s_{t-L} \\ s_{t+1} & s_t & & s_{t-L+1} \\ \vdots & & \ddots & \\ s_{t+N-1} & & & s_{t-L+N-1} \end{bmatrix} \cdot \begin{bmatrix} k_0 \\ k_1 \\ \vdots \\ k_L \end{bmatrix} = \begin{bmatrix} r_t - \alpha r_{t-1} \\ r_{t+1} - \alpha r_t \\ \vdots \\ r_{t+N-1} - \alpha r_{t+N-2} \end{bmatrix}$$

588 We then used the same method to solve for this deconvolved  $\mathbf{k}$ .

589

### 590 *Behavioral analysis*

591 Fly optomotor turning responses were measured and quantified using methods described in  
592 previous studies (Clark et al., 2014; Creamer et al., 2019; Salazar-Gatzimas et al., 2016). Briefly,  
593 flies were temporarily anesthetized on ice, glued to metal needles using UV-cured epoxy, and  
594 tethered so they could walk on air-suspended balls. The flies were positioned in the center of  
595 panoramic screens that cover  $270^\circ$  of azimuth and  $106^\circ$  of vertical visual space. Using the  
596 monochrome green light (peak 520 nm and mean luminance of  $\sim 100$  cd  $m^{-2}$ ) of a Lightcrafter DLP  
597 (Texas Instruments, USA), we projected stimuli onto the screens creating a virtual cylinder around

598 the fly. Turning response was quantified by measuring the rotation of the ball at 60 Hz using an  
599 optical mouse sensor. Flies were tested in a warm, temperature-controlled behavioral chamber  
600 (34–36°C), which resulted in strong behavior. Flies were presented with a periodic, white bar  
601 velocity sweep stimulus for 1 second trials with a velocity chosen in a pseudorandom order (table  
602 S3). Turning responses were averaged over the duration of the stimulus presentation and over trials  
603 to create fly averages. These were then averaged across multiple flies. Tuning curves were created  
604 following the same analysis procedure as in T4 imaging data.

605

### 606 *Tuning curves and center of mass*

607 To compute the T4 tuning curves in Figures 4-5, S9-10, and S13, we recorded T4 responses to a  
608 periodic stimulus moving at a variety of speeds. Each stimulus lasted 5 seconds. For each ROI,  
609 we computed the mean response over the 5 second presentation and over all presentations of a  
610 specific speed. We then averaged ROIs within flies to generate each fly's tuning curve. These  
611 were averaged across flies and those average curves were presented as normalized (Figure 4-5)  
612 or not normalized (Figure S9).

613

614 These tuning curves were quantified with a single number representing the center of mass of the  
615 curve as a function of log-velocity. The center of mass was computed as:

$$616 \log M = \frac{\sum_v R(v) \log v}{\sum_v R(v)}$$

617 where  $R(v)$  was the mean  $\Delta F/F$  response to a specific velocity  $v$ .  $R(v)$  was set to be 0 if values  
618 were negative. Thus, the center of mass is a geometric mean of the velocities, weighted by the  
619 responses.

620

### 621 Numerical modeling

622

#### 623 *Synaptic models for T4 neurons*

624 We constructed synaptic models for T4 neurons following prior work (Zavatone-Veth et al.,  
625 2020). Here, we briefly summarize this synaptic model, and describe two elaborations introduced  
626 in this work. The previously-introduced model (Zavatone-Veth et al., 2020) includes three  
627 inputs: a delayed ND-offset OFF inhibitory input representing Mi9, a centered ON excitatory  
628 input representing Mi1 and Tm3, and a delayed PD-offset ON inhibitory input representing Mi4.  
629 All inputs are modeled as linear-nonlinear (LN) transformations of the input contrast. Each input  
630 has a Gaussian spatial acceptance function with a full width at half maximum of 5.7 degrees  
631 (Stavenga, 2003; Zavatone-Veth et al., 2020); we denote the spatially filtered contrast signal by  
632  $c(t, x)$  for brevity. For temporal filters  $f_{\text{Mi9}}$ ,  $f_{\text{Mi1/Tm3}}$ , and  $f_{\text{Mi4}}$ , the three inputs to the model cell  
633 are then defined as rectified linear functions that mimic the polarity-selectivity of inputs to T4  
634 cells:

$$635 g_{\text{Mi9}}(t, x) = R(-(f_{\text{Mi9}} * c)(t, x - \Delta))$$

$$636 g_{\text{Mi1/Tm3}}(t, x) = R((f_{\text{Mi1/Tm3}} * c)(t, x))$$

$$637 g_{\text{Mi4}}(t, x) = R((f_{\text{Mi4}} * c)(t, x + \Delta)),$$

638 where  $*$  denotes temporal convolution,  $R(x) = \max\{0, x\}$  is the ramp function, and  $\Delta = 5^\circ$  is the  
639 spacing between neighboring inputs (Stavenga, 2003; Zavatone-Veth et al., 2020). Using these  
640 inputs, we then define the conductances for excitatory and inhibitory currents:

$$641 g_{\text{exc}} = \gamma_{\text{exc}} g_{\text{Mi1/Tm3}}$$

642 
$$g_{\text{inh}} = \gamma_{\text{inh}}(g_{\text{Mi9}} + g_{\text{Mi4}}),$$
  
 643 where  $\gamma_{\text{exc}}$  and  $\gamma_{\text{inh}}$  are constant gain factors. We then define the membrane potential  $V_m$  of the  
 644 model T4 cell as

645 
$$V_m = \frac{g_{\text{inh}}E_{\text{inh}} + g_{\text{exc}}E_{\text{exc}}}{g_{\text{leak}} + g_{\text{inh}} + g_{\text{exc}}},$$

646 where  $E_{\text{inh}}$  and  $E_{\text{exc}}$  are the reversal potentials for inhibitory and excitatory currents,  
 647 respectively, and  $g_{\text{leak}}$  is the leak conductance. Briefly, this nonlinearity follows from defining  
 648  $V_m$  such that the reversal potential for leak currents is 0 mV and then making a pseudo-steady-  
 649 state approximation for the voltage in the limit of small membrane capacitance (Gruntman et al.,  
 650 2018; Torre and Poggio, 1978; Zavatone-Veth et al., 2020). Finally, we model the transformation  
 651 from membrane voltage to calcium concentration by a positively rectifying half-quadratic  
 652 function  $R^2(x) \equiv (R(x))^2$ :

653 
$$C(t, x) = R^2(V_m(t, x)).$$

654 The gain factors  $\gamma_{\text{exc}}$  and  $\gamma_{\text{inh}}$  can then be represented in units of  $g_{\text{leak}}$ ; as in prior work  
 655 (Zavatone-Veth et al., 2020) we fix  $\frac{\gamma_{\text{exc}}}{g_{\text{leak}}} = 0.1$  and  $\frac{\gamma_{\text{inh}}}{g_{\text{leak}}} = 0.3$  throughout. We note that this  
 656 choice also reflects a choice of scale of the temporal filters; we scale all temporal filters to have  
 657 unit  $\ell_2$  norm after discretizing time in our simulations (Zavatone-Veth et al., 2020). This choice  
 658 of scale yields filters with units of inverse contrast.

659  
 660 In this work, we introduce two minimally elaborated versions of this model. First, as we perform  
 661 simulations using measured, non-identical temporal filters for Mi1 and Tm3, we introduce an  
 662 extension with separate inputs to represent these neurons,

663 
$$g_{\text{Mi1}}(t, x) = R(+ (f_{\text{Mi1}} * c)(t, x))$$
  
 664 
$$g_{\text{Tm3}}(t, x) = R(+ (f_{\text{Tm3}} * c)(t, x)),$$

665 which are then integrated as

666 
$$g_{\text{exc}} = \gamma_{\text{exc}} \frac{g_{\text{Mi1}} + g_{\text{Tm3}}}{2}.$$

667 Second, we introduce a variant that incorporates a second PD-offset delay line to represent CT1,  
 668 with an additional input

669 
$$g_{\text{CT1}}(t, x) = R(+ (f_{\text{CT1}} * c)(t, x + \Delta)),$$

670 and the conductance of inhibitory currents modified to

671 
$$g_{\text{inh}} = \gamma_{\text{inh}} \left( g_{\text{Mi9}} + \frac{g_{\text{Mi4}} + g_{\text{CT1}}}{2} \right).$$

672 In both cases, we choose to introduce the new inputs such that the elaborated models reduce to  
 673 the un-elaborated model when the relevant temporal filters are identical. We note that, with our  
 674 stimulus design and chosen thresholds for the model, the Mi9-like input does not contribute to  
 675 simulated model responses.

676  
 677 In Figure S14, we sweep the gain factor of the Mi4-like input to the model. Concretely, we  
 678 fractionally rescale the value for the gain factor chosen in (Zavatone-Veth et al., 2020) by a  
 679 factor ranging between zero and four. To visualize the resulting tuning changes, we plot the  
 680 center of mass of each tuning curve in log-velocity space.

681

682 *Synthetic filters*

683 As in (Zavatone-Veth et al., 2020), we use an  $L_2$ -normalized second order lowpass filter  $f(t) =$   
684  $2\tau^{-\frac{3}{2}}t \exp\left(-\frac{t}{\tau}\right) \Theta(t)$  and its normalized distributional derivative  $g(t) = 2\tau^{-\frac{3}{2}}(\tau -$   
685  $t) \exp\left(-\frac{t}{\tau}\right) \Theta(t)$ , with rescaling to obtain unit  $\ell_2$  norms after discretization. The function  $\Theta(t)$   
686 is the Heaviside step function.

687

688 *Visual Stimuli*

689 In all simulations, we used 5-degree-wide drifting bar stimuli with a spatial period of 45 degrees,  
690 designed to mimic the stimuli used in experiments. We chose the background of these stimuli to  
691 have contrast zero, and the foreground bars to have contrast one. Therefore, the Mi9-like input of  
692 the model from (Zavatone-Veth et al., 2020) does not respond to these stimuli, as it is sensitive  
693 only to negative contrasts.

694

695 *Numerical methods*

696 As in prior work (Zavatone-Veth et al., 2020), all simulations were performed using a spatial  
697 sampling interval of 0.5 degrees and a temporal sampling interval of 1/240 s. All simulations  
698 were performed using Matlab 9.8 (R2020a) (The MathWorks, Natick, MA, USA).

699

700 *Smoothing measured temporal filters using discrete Laguerre functions*

701 We smoothed the measured, calcium-deconvolved filters by projecting them into a truncated  
702 basis set of discrete Laguerre functions (Mano et al., 2019; Marmarelis, 1993). For a scale  
703 parameter  $\alpha \in (0,1)$ , the discrete Laguerre polynomials  $p_j^{(\alpha)}[t]$  are the orthogonal polynomials  
704 on  $\mathbb{N}_{\geq 0}$  for the discrete exponential weight, i.e., the polynomials satisfying  
705  $\sum_{t=0}^{\infty} p_j^{(\alpha)}[t] p_k^{(\alpha)}[t] \alpha^t = \delta_{jk}$ . The orthonormal discrete Laguerre functions  $\lambda_j^{(\alpha)}[t]$  then follow by  
706 absorbing the weight, and are explicitly given as

707 
$$\lambda_j^{(\alpha)}[t] = \alpha^{\frac{t-j}{2}} (1-\alpha)^{\frac{1}{2}} \sum_{k=0}^j (-1)^k \binom{t}{k} \binom{j}{k} \alpha^{j-k} (1-\alpha)^k$$

708 for  $t \in \mathbb{N}_{\geq 0}$  and  $j \in \mathbb{N}_{\geq 0}$ . These functions form a complete orthonormal basis for the space of  
709 square-summable functions on  $\mathbb{N}_{\geq 0}$ , and are a convenient basis for temporal kernels as they  
710 incorporate the expected temporal decay (Marmarelis, 1993). As in prior work (Mano et al.,  
711 2019), we chose the five lowest-order functions. To obtain qualitatively reasonable smoothed  
712 filters, we set  $\alpha = 0.2$  (Marmarelis, 1993). After projecting the deconvolved filters into this  
713 subspace, we re-normalized them to have unit  $\ell_2$  norm. The resulting smoothed filters are plotted  
714 along with their deconvolved and raw counterparts in Figure S11.

715

716 *Statistical analysis*

717 For statistical purposes, individual flies were considered independent measurements. Each fly  
718 yielded multiple ROIs, and the ROIs' responses were averaged together to generate a single  
719 response per fly. In extracting filters, all the filters extracted from a fly's multiple ROI traces  
720 were averaged to obtain a single filter per fly. Then, each fly's filter was normalized by its peak  
721 amplitude, and each filter's characteristic rise, peak, and fall time were computed. To display  
722 normalized average filters, they were averaged across flies, before the average was scaled to  
723 have a maximum excursion of 1. Similarly, the dynamics bar plots are also the average across



724 multiple flies. The solid filter line and shaded error bars indicate the mean  $\pm$  SEM. Similar  
725 averaging was done for T4 recordings. After averaging ROI traces in time, a single tuning curve  
726 was obtained for the progressive and regressive layers of T4 and T5. Main text figures depict a  
727 tuning curve resulting from the combination of the progressive and regressive layers for T4. All  
728 tuning curves were normalized to their peak on a per-fly basis and the curve's center of mass was  
729 computed on a per fly basis. In the figure legends, n values indicate the number of individual  
730 flies. Some control genotypes were tested continuously throughout the course of experiments,  
731 which were performed over several years. This is reflected in larger sample sizes for those  
732 genotypes. Throughout, non-parametric tests were used to assess statistical significance, as noted  
733 in the figure legends.

734

### 735 **Acknowledgements**

736

737 This paper benefitted from discussions with J. Demb, M. Higley, L. Kaczmarek, H. Keshishian,  
738 P. Masset, and S. Qin, as well as members of the Clark lab. The UAS-*slo* construct was provided  
739 by N. Atkinson. The UAS-*Sh*-DN construct was given to us by H. Keshishian.

740

### 741 **Funding**

742

743 Support of ADG-S: Ford Foundation Fellowships Program, the NSF Graduate Research  
744 Fellowships Program, the Philanthropic Educational Organization Sisterhood Fellowship, and  
745 the Kavli Scholar Award Fellowship.

746 Support of JAZ-V: NSF-Simons Center for Mathematical and Statistical Analysis of Biology at  
747 Harvard and the Harvard Quantitative Biology Initiative.

748 Support of DAC and this project: NIH R01EY026555, NIH R01NS121773, NIH P30EY026878,  
749 NSF IOS1558103, the E. Mathilda Ziegler Foundation for the Blind, and a Sloan Foundation  
750 Research Fellowship in Neuroscience.

751

### 752 **Author Contributions**

753

754 Conceptualization: ADG-S and DAC.

755 Methodology & Investigation: ADG-S, CAM, and BAB

756 Analysis: ADG-S, JAZ-V, JC, CAM, and DAC.

757 Modeling: ADG-S, JAZ-V, and DAC.

758 Writing: ADG-S and DAC.

759

### 760 **Competing Interests Statements**

761

762 The authors declare no competing interests.

763

### 764 **Data and Code Availability**

765

766 Data is available upon request to the Lead Contact, Damon Clark ([damon.clark@yale.edu](mailto:damon.clark@yale.edu)).

767 Software for the models is available from GitHub:

768 <http://www.github.com/ClarkLabCode/SynapticModelTimingCode>.

769 **Figures**  
770

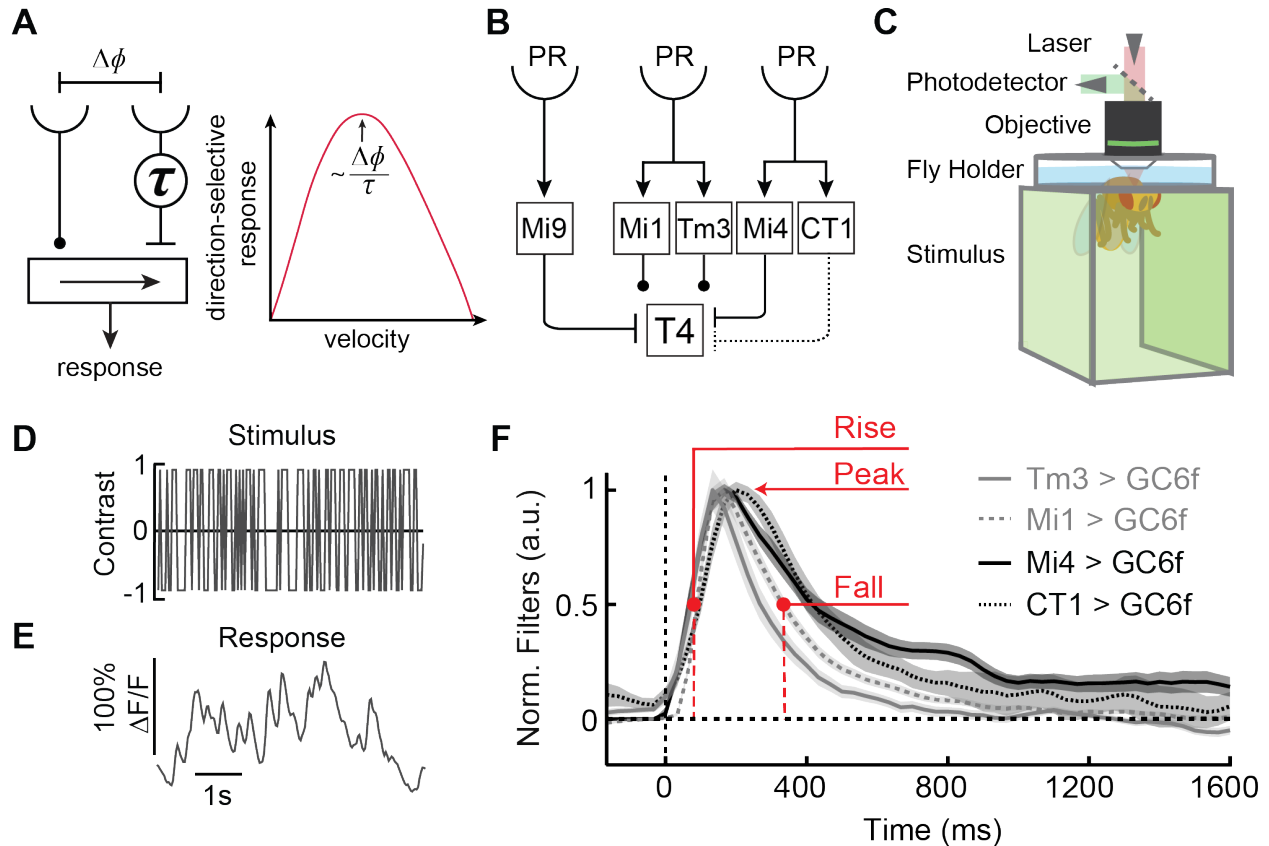

- 771  
772 **Figure 1. Medulla neurons exhibit heterogeneous filter dynamics.**  
773 (A) A model of direction-selective motion detection has two inputs separated by an angle  $\Delta\phi$ ,  
774 one of which is delayed by a time  $\tau$ . Nonlinear combination of the two signals results in a  
775 direction-selective response. The model's direction-selective response is maximal at a  
776 velocity that scales with the sensor separation ( $\Delta\phi$ ) divided by the temporal delay ( $\tau$ ).  
777 (B) Circuit diagram highlighting neurons with strong anatomical connections to the direction-  
778 selective cell T4 (Takemura et al., 2017). Solid lines highlight connections that have been  
779 established functionally (Strother et al., 2017), while the dashed line refers to an  
780 anatomical connection without established function.  
781 (C) Two-photon imaging was performed in head-fixed flies viewing stimuli presented on  
782 panoramic screens.  
783 (D) A stochastic, binary, high-contrast stimulus was presented to flies to facilitate estimating  
784 neural linear filtering properties.  
785 (E) Example response trace to the stimulus of an Mi1 neuron expressing GCaMP6f  
786 (hereinafter, Mi1 > GC6f), plotted as the change in fluorescence relative to baseline  
787 ( $\Delta F/F$ ).  
788 (F) Linear filters represent each neuron's dynamics by characterizing how they respond to  
789 preceding stimuli. Plotted filters correspond to Mi1 (Mi1 > GC6f,  $n = 68$  flies), Tm3  
790 (Tm3 > GC6f,  $n = 25$  flies), Mi4 (Mi4 > GC6f,  $n = 15$  flies), and CT1 (CT1 > GC6f,  $n =$   
791 17 flies). Linear filters are normalized to the maximum response of each fly's mean filter.

792 Lines are mean  $\pm$  SEM. Neural response dynamics can be quantified by the filter's half-  
793 rise ('rise'), peak amplitude ('peak'), and half-fall ('fall') times.

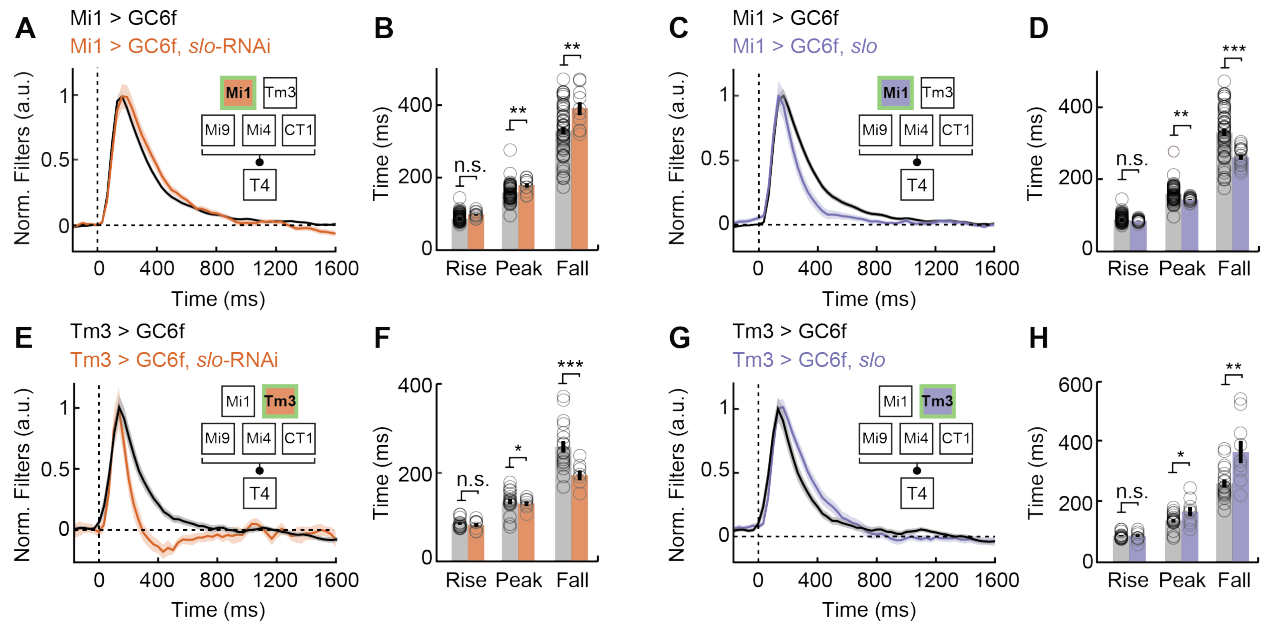

794  
795  
796  
797  
798  
799  
800  
801  
802  
803  
804  
805  
806  
807  
808  
809  
810  
811  
812

**Figure 2. Cell-type-specific genetic manipulations of excitatory neurons Mi1 and Tm3 alter their dynamics.**

- (A) Filters of Mi1 expressing *slo*-RNAi (Mi1 > GC6f, n = 68; Mi1 > GC6f, *slo*-RNAi, n = 19). Lines are mean  $\pm$  SEM.
- (B) Half-rise (rise), peak, and half-fall (fall) times averaged across flies for the filters in (A).
- (C-D) As in (A-B), but with Mi1 over-expressing *slowpoke* (*slo*) (Mi1 > GC6f, *slo*, n = 16), compared to Mi1 native filter kinetics (Mi1 > GC6f, n = 68).
- (E-F) As in (A-B), but with Tm3 expressing *slo*-RNAi (Tm3 > GC6f, n = 25; Tm3 > GC6f, *slo*-RNAi, n = 19).
- (G-H) As in (A-B), but with Tm3 over-expressing *slo* (Tm3 > GC6f, n = 25; Tm3 > GC6f, *slo*, n = 8).
- (I-J) As in (A-B), but with Mi4 expressing an RNAi to knock-down *cacophony* (*cac*) (Mi4 > GC6f, n = 15; Mi4 > GC6f, *cac*-RNAi, n = 11).
- (K-L) As in (A-B), but with CT1 expressing *cac*-RNAi (CT1 > GC6f, n = 17; CT1 > GC6f, *cac*-RNAi, n = 11). (\* p < 0.05, \*\* p < 0.01, \*\*\* p < 0.001 by Wilcoxon signed-rank tests across flies.)

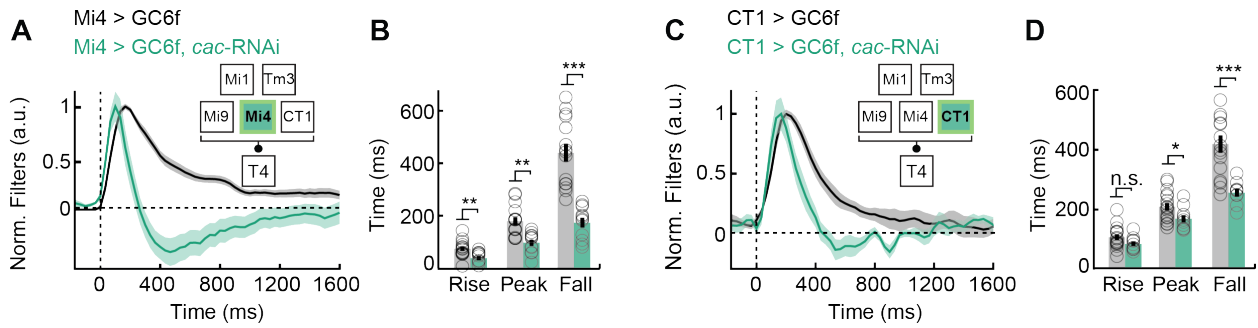

813  
814  
815  
816  
817  
818  
819  
820  
821  
822

**Figure 3. Cell-type-specific genetic manipulations of inhibitory neurons Mi4 and CT1 alter their dynamics.**

- (A) Filters of Mi4 expressing an RNAi to knock-down *cacophony* (*cac*) (Mi4 > GC6f, n = 15; Mi4 > GC6f, *cac*-RNAi, n = 11). Lines are mean  $\pm$  SEM.
- (B) Half-rise (rise), peak, and half-fall (fall) times averaged across flies for the filters in (A).
- (C-D) As in (A-B), but with CT1 expressing *cac*-RNAi (CT1 > GC6f, n = 17; CT1 > GC6f, *cac*-RNAi, n = 11). (\*  $p < 0.05$ , \*\*  $p < 0.01$ , \*\*\*  $p < 0.001$  by Wilcoxon signed-rank tests across flies.)



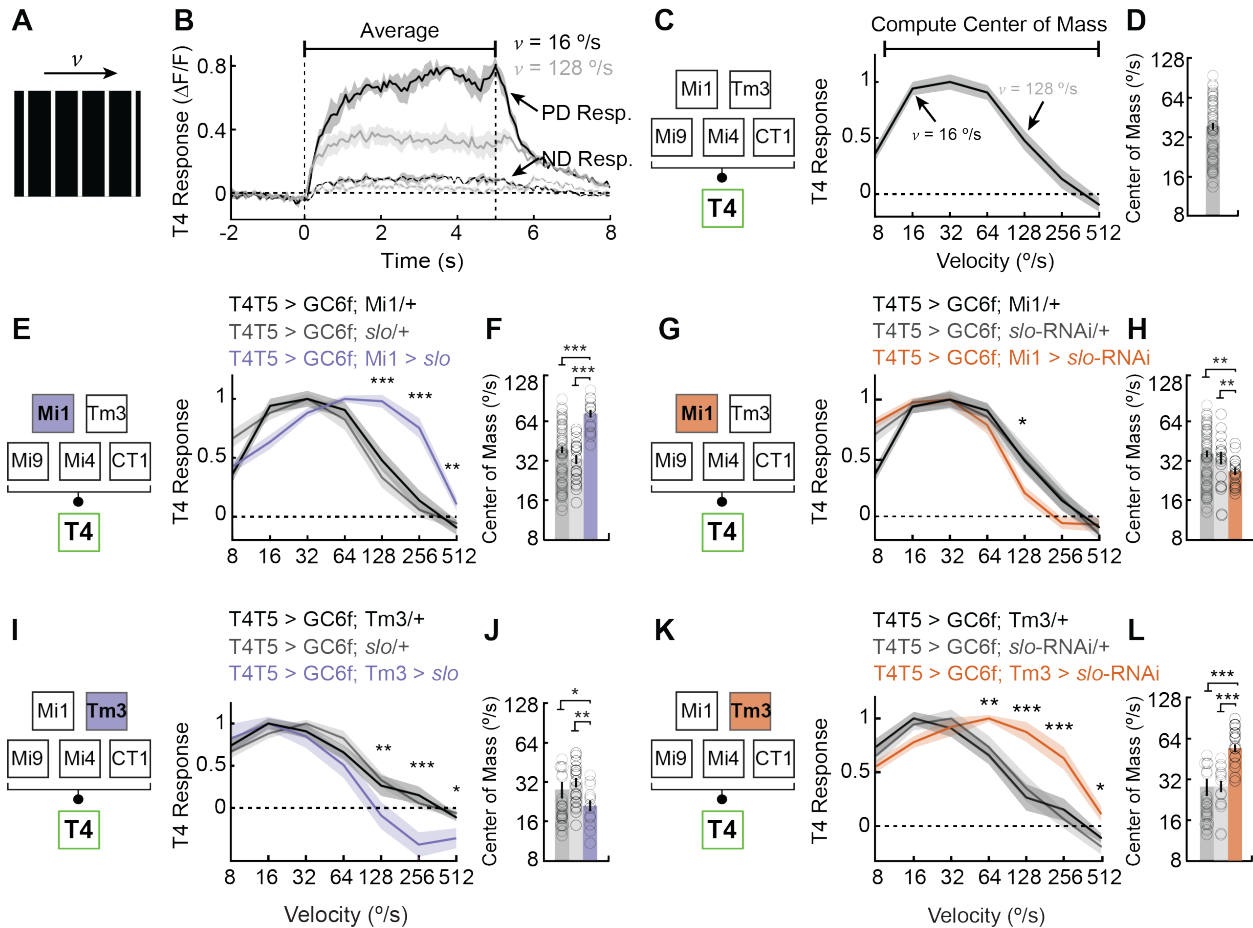

823  
824  
825

**Figure 4. Genetic manipulations of excitatory inputs Mi1 and Tm3 dynamics alter T4 tuning.**

- 826 (A) The stimulus used to probe T4 tuning consists of white 5°-wide bars with 30° spacing  
827 rotating rightward and leftward at speeds between 8 and 512°/s.
- 828 (B) Average T4 responses to white bars moving in the preferred direction (PD) and the null  
829 direction (ND) at 16°/s and 128°/s. Both PD and ND responses are averaged over the 5  
830 second stimulus presentation window (n = 43 flies).
- 831 (C) Example tuning curve computed from the raw response trace in (B). PD responses are  
832 shown, and each fly's curve is normalized to its maximum response before averaging,  
833 depicted by black, horizontal bar. Curves show mean and shading shows SEM.
- 834 (D) The tuning curve's log-velocity center of mass is a weighted average of the tuning curve  
835 shown in (C). Bars are mean ± SEM.
- 836 (E) T4 tuning curves of flies over-expressing *slowpoke* (*slo*) in Mi1 (T4T5 > GC6f, Mi1 >  
837 *slo*, n = 9) compared to two genetic controls (T4T5 > GC6f; Mi1/+, n = 43 and T4T5 >  
838 GC6f; *slo*/+, n = 11). Lines are mean ± SEM.
- 839 (F) Center of mass of T4 tuning curves from genotypes in (E).
- 840 (G-H) As in (E-F), but for Mi1 expressing *slo*-RNAi (T4T5 > GC6f, Mi1 > *slo*-RNAi, n = 7)  
841 compared to two genetic controls (T4T5 > GC6f; Mi1/+, n = 43 and T4T5 > GC6f; *slo*-  
842 RNAi/+, n = 10).
- 843 (I-J) As in (E-F), but for Tm3 over-expressing *slo* (T4T5 > GC6f, Tm3 > *slo*, n = 7) compared  
844 to two genetic controls (T4T5 > GC6f; Tm3/+, n = 11 and T4T5 > GC6f; *slo*/+, n = 11).

845 **(K-L)** As in (E-F), but for Tm3 expressing *slo*-RNAi (T4T5 > GC6f, Tm3 > *slo*-RNAi, n = 12)  
846 compared to two genetic controls (T4T5 > GC6f; Tm3/+, n = 11 and T4T5 > GC6f; *slo*-  
847 RNAi/+, n = 10). (\* p<0.05, \*\* p<0.01, \*\*\* p<0.001 by Wilcoxon signed-rank tests  
848 across flies. When there are two controls (in E, G, I, K), the reported significance is the  
849 larger of the comparisons to the two controls.)  
850  
851

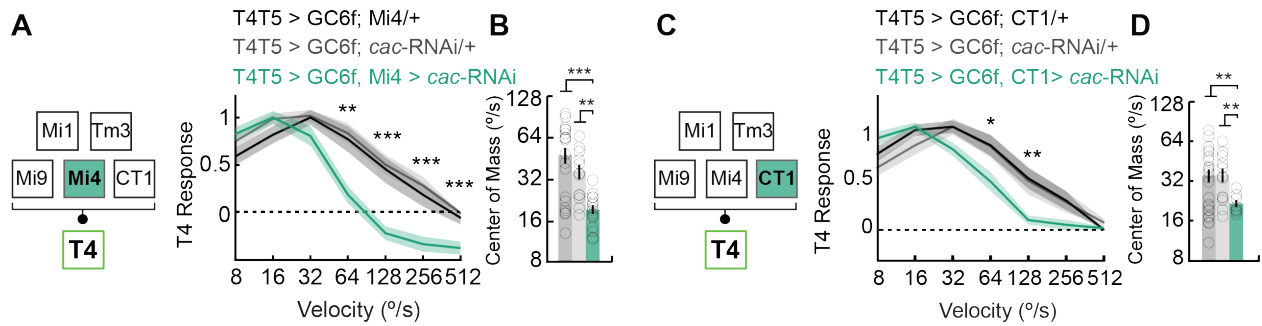

852

853

854 **Figure 5. Genetic manipulations of inhibitory inputs Mi4 and CT1 dynamics alter T4**

855 **tuning.** (A) T4 tuning curves of flies expressing an RNAi to knock-down *cacophony* (*cac*) in Mi4

856 (T4T5 > GC6f, Mi4 > *cac*-RNAi, n = 8) compared to two genetic controls (T4T5 >

857 GC6f; Mi4/+, n = 12 and T4T5 > GC6f; *cac*-RNAi/+, n = 8). Lines are mean ± SEM.

858 (B) Center of mass of T4 tuning curves from genotypes in (A).

859 (C-D) As in (A-B), but for CT1 expressing *cac*-RNAi (T4T5 > GC6f, CT1 > *cac*-RNAi, n = 7)

860 compared to two genetic controls (T4T5 > GC6f; CT1/+, n = 12 and T4T5 > GC6f; *cac*-

861 RNAi/+, n = 8). (\* p < 0.05, \*\* p < 0.01, \*\*\* p < 0.001 by Wilcoxon signed-rank tests across

862 flies. When there are two controls (in A, C), the reported significance is the larger of the

863 comparisons to the two controls.)

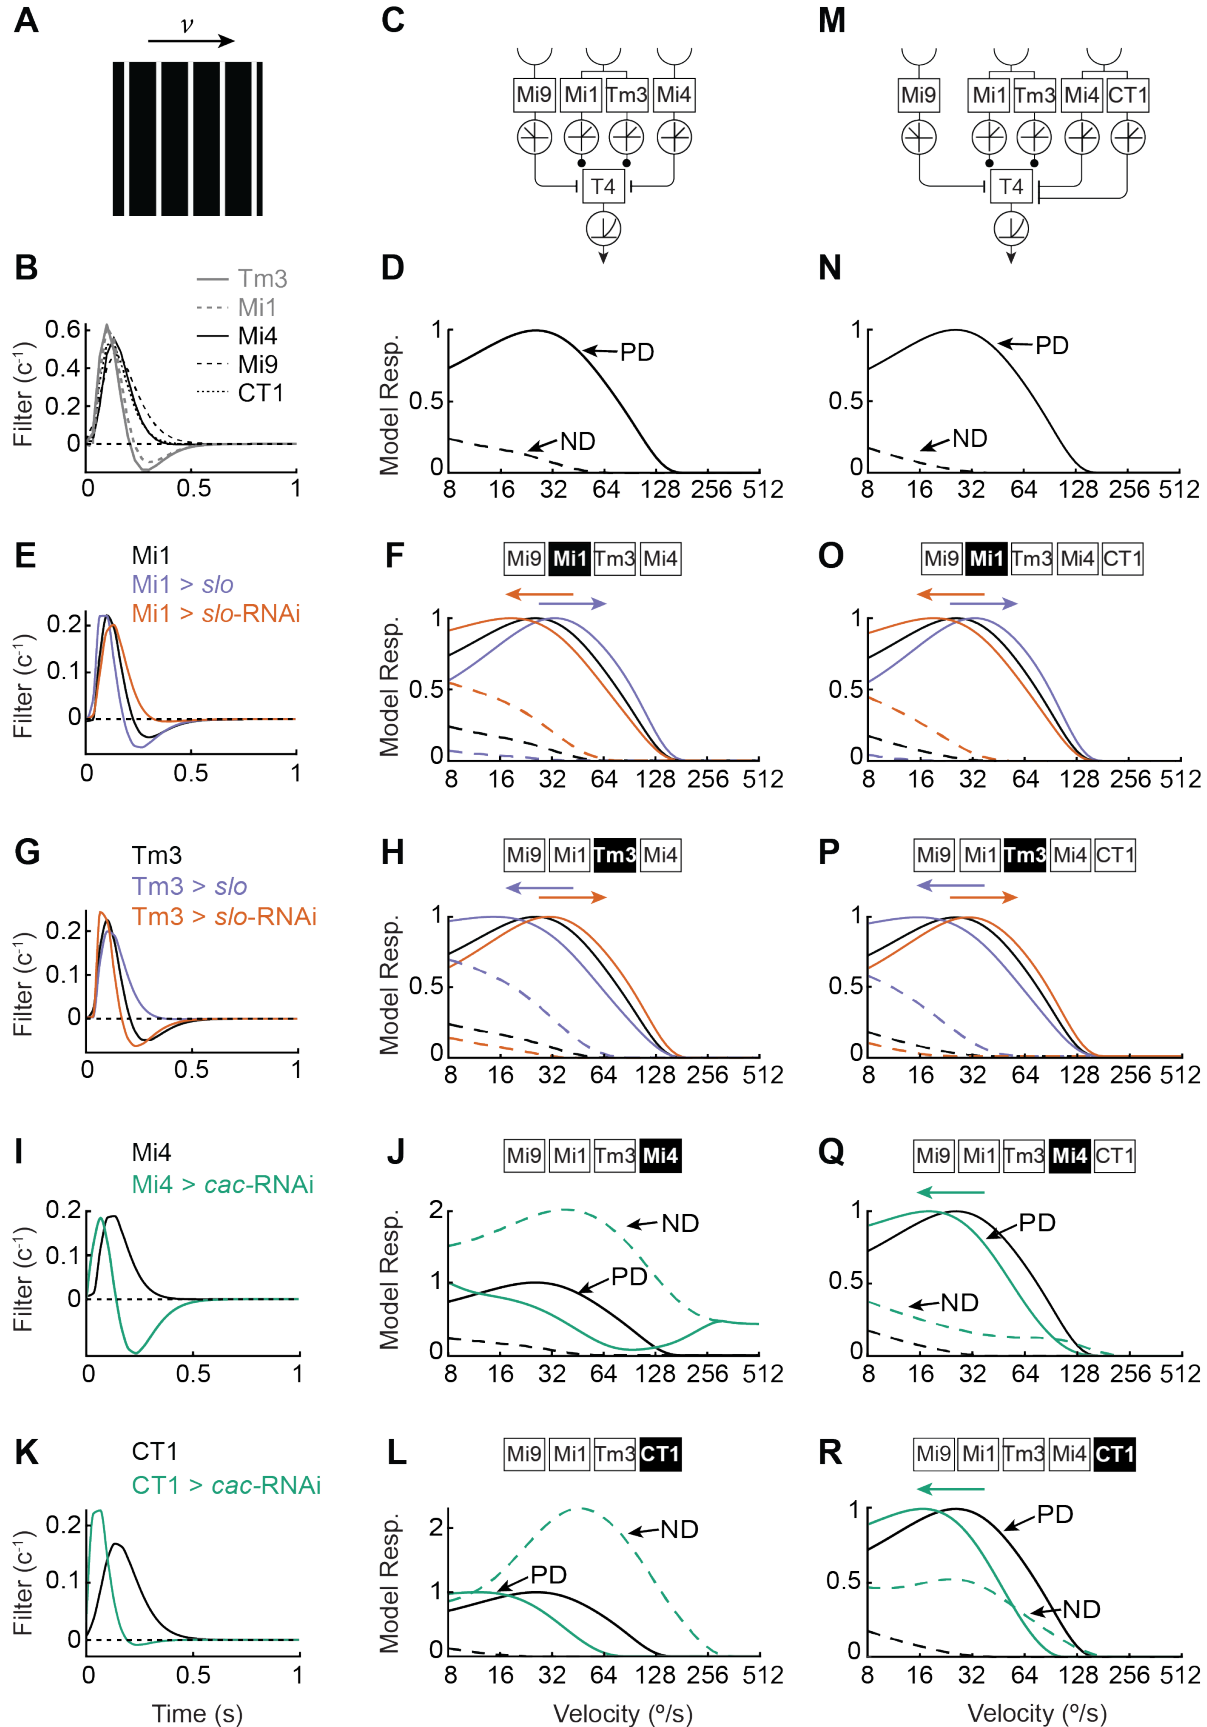

865 **Figure 6. A synaptic model requires parallel, delayed inhibitory inputs to reproduce**  
866 **experimental results.**

- 867 **(A)** The experimental stimulus was used to simulate model responses.  
868 **(B)** Data-driven model filters were produced by de-convolving indicator dynamics from  
869 measured filters and then smoothing (see Methods).  
870 **(C)** Anatomically constrained synaptic model composed of three spatial inputs to T4: on the  
871 model's null direction side, Mi9 is simulated as a delayed, OFF-responsive, inhibitory  
872 input; in the center, Mi1 and Tm3 share one spatial input and provide excitatory input;  
873 and on the model's preferred direction side, Mi4 serves as a delayed, ON-responsive,  
874 inhibitory input.  
875 **(D)** The data-driven wildtype filters of each cell type were used to simulate the wildtype  
876 model's response to the stimulus used in Figure 4-5 as it moved in preferred (PD) and  
877 null directions (ND) at different speeds.  
878 **(E-F)** As in (D), but with filters from wildtype Mi1, Mi1 over-expressing *slowpoke* (*slo*) (Mi1 >  
879 *slo*), and Mi1 expressing *slo*-RNAi (Mi1 > *slo*-RNAi).  
880 **(G-H)** As in (D), but with filters from wildtype Tm3, Tm3 over-expressing *slo* (Tm3 > *slo*), and  
881 Tm3 expressing *slo*-RNAi (Mi1 > *slo*-RNAi).  
882 **(I-J)** As in (D), but with filters from wildtype Mi4 and Mi4 with *cacophony* (*cac*) knocked-  
883 down (Mi4 > *cac*-RNAi).  
884 **(K-L)** As in (D), but with filters from wildtype CT1 and CT1 expressing *cac*-RNAi (CT1 > *cac*-  
885 RNAi).  
886 **(M)** As in (C), but for an extended synaptic model with two parallel, delayed inhibitory inputs  
887 representing Mi4 and CT1.  
888 **(N)** The data-driven filters from (B) were used to simulate the model's response in the  
889 presence of a parallel, delayed inhibitory input.  
890 **(O)** As in (N), but with the filters used in (E).  
891 **(P)** As in (N), but with the filters used in (G).  
892 **(Q)** As in (N), but with the filters used in (I).  
893 **(R)** As in (N), but with the filters used in (K).  
894



895 **References**

896

- 897 Adelson, E.H., and Bergen, J.R. (1985). Spatiotemporal energy models for the perception of  
898 motion. *J. Opt. Soc. Am. A* 2, 284–299.
- 899 Alabi, A.A., and Tsien, R.W. (2012). Synaptic vesicle pools and dynamics. *Cold Spring Harb.*  
900 *Perspect. Biol.* 4, a013680.
- 901 Arenz, A., Drews, M.S., Richter, F.G., Ammer, G., and Borst, A. (2017). The temporal tuning of  
902 the drosophila motion detectors is determined by the dynamics of their input elements. *Curr.*  
903 *Biol.* 27, 929–944.
- 904 Baden, T., Berens, P., Bethge, M., and Euler, T. (2013). Spikes in mammalian bipolar cells  
905 support temporal layering of the inner retina. *Curr. Biol.* 23, 48–52.
- 906 Badwan, B.A., Creamer, M.S., Zavatone-Veth, J.A., and Clark, D.A. (2019). Dynamic  
907 nonlinearities enable direction opponency in *Drosophila* elementary motion detectors. *Nat.*  
908 *Neurosci.* 22, 1318–1326.
- 909 Banerjee, A., Egger, R., and Long, M.A. (2021). Using focal cooling to link neural dynamics and  
910 behavior. *Neuron* 109, 2508–2518.
- 911 Barlow, H.B., and Levick, W.R. (1965). The mechanism of directionally selective units in  
912 rabbit’s retina. *J. Physiol. (Lond.)* 178, 477–504.
- 913 Becker, M.N., Brenner, R., and Atkinson, N.S. (1995). Tissue-specific expression of a  
914 *Drosophila* calcium-activated potassium channel. *J. Neurosci.* 15, 6250–6259.
- 915 Behnia, R., Clark, D.A., Carter, A.G., Clandinin, T.R., and Desplan, C. (2014). Processing  
916 properties of ON and OFF pathways for *Drosophila* motion detection. *Nature* 512, 427–430.
- 917 Borst, A. (2018). A biophysical mechanism for preferred direction enhancement in fly motion  
918 vision. *PLoS Comput. Biol.* 14, e1006240.
- 919 Brainard, D.H. (1997). The Psychophysics Toolbox. *Spat Vis* 10, 433–436.
- 920 Chen, T.-W., Wardill, T.J., Sun, Y., Pulver, S.R., Renninger, S.L., Baohan, A., Schreiter, E.R.,  
921 Kerr, R.A., Orger, M.B., Jayaraman, V., et al. (2013). Ultrasensitive fluorescent proteins for  
922 imaging neuronal activity. *Nature* 499, 295–300.
- 923 Chichilnisky, E.J. (2001). A simple white noise analysis of neuronal light responses. *Network*  
924 12, 199–213.
- 925 Churchland, M.M., Cunningham, J.P., Kaufman, M.T., Foster, J.D., Nuyujukian, P., Ryu, S.I.,  
926 and Shenoy, K.V. (2012). Neural population dynamics during reaching. *Nature* 487, 51–56.
- 927 Clark, D.A., Bursztyn, L., Horowitz, M.A., Schnitzer, M.J., and Clandinin, T.R. (2011). Defining

- 928 the computational structure of the motion detector in *Drosophila*. *Neuron* *70*, 1165–1177.
- 929 Clark, D.A., Fitzgerald, J.E., Ales, J.M., Gohl, D.M., Silies, M.A., Norcia, A.M., and Clandinin,  
930 T.R. (2014). Flies and humans share a motion estimation strategy that exploits natural scene  
931 statistics. *Nat. Neurosci.* *17*, 296–303.
- 932 Creamer, M.S., Mano, O., and Clark, D.A. (2018). Visual control of walking speed in *Drosophila*.  
933 *Neuron* *100*, 1460–1473.e6.
- 934 Creamer, M.S., Mano, O., Tanaka, R., and Clark, D.A. (2019). A flexible geometry for  
935 panoramic visual and optogenetic stimulation during behavior and physiology. *J. Neurosci.*  
936 *Methods* *323*, 48–55.
- 937 Dan, Y., and Poo, M.-M. (2004). Spike timing-dependent plasticity of neural circuits. *Neuron* *44*,  
938 23–30.
- 939 Davis, G.W. (2006). Homeostatic control of neural activity: from phenomenology to molecular  
940 design. *Annu. Rev. Neurosci.* *29*, 307–323.
- 941 Davis, F.P., Nern, A., Picard, S., Reiser, M.B., Rubin, G.M., Eddy, S.R., and Henry, G.L. (2018).  
942 A genetic, genomic, and computational resource for exploring neural circuit function. *BioRxiv*.
- 943 Demb, J.B., and Singer, J.H. (2015). Functional circuitry of the retina. *Annu. Rev. Vis. Sci.* *1*,  
944 263–289.
- 945 Dietzl, G., Chen, D., Schnorrer, F., Su, K.-C., Barinova, Y., Fellner, M., Gasser, B., Kinsey, K.,  
946 Oettel, S., Scheiblauer, S., et al. (2007). A genome-wide transgenic RNAi library for conditional  
947 gene inactivation in *Drosophila*. *Nature* *448*, 151–156.
- 948 Drinnenberg, A., Franke, F., Morikawa, R.K., Jüttner, J., Hillier, D., Hantz, P., Hierlemann, A.,  
949 Azeredo da Silveira, R., and Roska, B. (2018). How Diverse Retinal Functions Arise from  
950 Feedback at the First Visual Synapse. *Neuron* *99*, 117–134.e11.
- 951 Egelhaaf, M., and Borst, A. (1989). Transient and steady-state response properties of movement  
952 detectors. *J. Opt. Soc. Am. A* *6*, 116–127.
- 953 Egger, R., Tupikov, Y., Elmaleh, M., Katlowitz, K.A., Benezra, S.E., Picardo, M.A., Moll, F.,  
954 Kornfeld, J., Jin, D.Z., and Long, M.A. (2020). Local axonal conduction shapes the  
955 spatiotemporal properties of neural sequences. *Cell* *183*, 537–548.e12.
- 956 Elkins, T., Ganetzky, B., and Wu, C.F. (1986). A *Drosophila* mutation that eliminates a calcium-  
957 dependent potassium current. *Proc. Natl. Acad. Sci. USA* *83*, 8415–8419.
- 958 Fisher, Y.E., Yang, H.H., Isaacman-Beck, J., Xie, M., Gohl, D.M., and Clandinin, T.R. (2017).  
959 FlpStop, a tool for conditional gene control in *Drosophila*. *Elife* *6*.
- 960 Ford, K.J., and Davis, G.W. (2014). Archaerhodopsin voltage imaging: synaptic calcium and BK  
961 channels stabilize action potential repolarization at the *Drosophila* neuromuscular junction. *J.*

- 962 Neurosci. *34*, 14517–14525.
- 963 Gisselmann, G., Sewing, S., Madsen, B.W., Mallart, A., Angaut-Petit, D., Müller-Holtkamp, F.,  
964 Ferrus, A., and Pongs, O. (1989). The interference of truncated with normal potassium channel  
965 subunits leads to abnormal behaviour in transgenic *Drosophila melanogaster*. *EMBO J.* *8*, 2359–  
966 2364.
- 967 Groschner, L.N., Chan Wah Hak, L., Bogacz, R., DasGupta, S., and Miesenböck, G. (2018).  
968 Dendritic Integration of Sensory Evidence in Perceptual Decision-Making. *Cell* *173*, 894–  
969 905.e13.
- 970 Grothe, B., Pecka, M., and McAlpine, D. (2010). Mechanisms of sound localization in mammals.  
971 *Physiol. Rev.* *90*, 983–1012.
- 972 Gruntman, E., Romani, S., and Reiser, M.B. (2018). Simple integration of fast excitation and  
973 offset, delayed inhibition computes directional selectivity in *Drosophila*. *Nat. Neurosci.* *21*, 250–  
974 257.
- 975 Gür, B., Sporar, K., Lopez-Behling, A., and Silies, M. (2020). Distinct expression of potassium  
976 channels regulates visual response properties of lamina neurons in *Drosophila melanogaster*. *J.*  
977 *Comp. Physiol. A, Neuroethol. Sens. Neural Behav. Physiol.* *206*, 273–287.
- 978 Haag, J., Arenz, A., Serbe, E., Gabbiani, F., and Borst, A. (2016). Complementary mechanisms  
979 create direction selectivity in the fly. *Elife* *5*.
- 980 Hartwig, C.L., Worrell, J., Levine, R.B., Ramaswami, M., and Sanyal, S. (2008). Normal  
981 dendrite growth in *Drosophila* motor neurons requires the AP-1 transcription factor. *Dev.*  
982 *Neurobiol.* *68*, 1225–1242.
- 983 Hassenstein, B., and Reichardt, W. (1956). Systemtheoretische Analyse der Zeit-, Reihenfolgen-  
984 und Vorzeichenauswertung bei der Bewegungsperzeption des Rüsselkäfers *Chlorophanus*.  
985 *Zeitschrift Für Naturforschung B* *11*, 513–524.
- 986 Jeffress, L.A. (1948). A place theory of sound localization. *J Comp Physiol Psychol* *41*, 35–39.
- 987 Jin, L., Han, Z., Platasa, J., Wooltorton, J.R.A., Cohen, L.B., and Pieribone, V.A. (2012). Single  
988 action potentials and subthreshold electrical events imaged in neurons with a fluorescent protein  
989 voltage probe. *Neuron* *75*, 779–785.
- 990 Joesch, M., Schnell, B., Raghu, S.V., Reiff, D.F., and Borst, A. (2010). ON and OFF pathways in  
991 *Drosophila* motion vision. *Nature* *468*, 300–304.
- 992 Kim, J.S., Greene, M.J., Zlateski, A., Lee, K., Richardson, M., Turaga, S.C., Purcaro, M.,  
993 Balkam, M., Robinson, A., Behabadi, B.F., et al. (2014). Space-time wiring specificity supports  
994 direction selectivity in the retina. *Nature* *509*, 331–336.
- 995 Kleiner, M., Brainard, D., and Pelli, D. (2007). A free cross-platform toolkit for Psychophysics  
996 with Matlab & GNU/Octave. *PLOS ONE*.

- 997 Knudsen, E.I., and Konishi, M. (1978). A neural map of auditory space in the owl. *Science* *200*,  
998 795–797.
- 999 Knudsen, E.I., and Konishi, M. (1979). Mechanisms of sound localization in the barn owl (*Tyto*  
1000 *alba*). *J. Comp. Physiol.* *133*, 13–21.
- 1001 Laurent, G. (2002). Olfactory network dynamics and the coding of multidimensional signals.  
1002 *Nat. Rev. Neurosci.* *3*, 884–895.
- 1003 Leong, J.C.S., Esch, J.J., Poole, B., Ganguli, S., and Clandinin, T.R. (2016). Direction Selectivity  
1004 in *Drosophila* Emerges from Preferred-Direction Enhancement and Null-Direction Suppression.  
1005 *J. Neurosci.* *36*, 8078–8092.
- 1006 Leonte, M.-B., Leonhardt, A., Borst, A., and Mauss, A.S. (2021). Aerial course stabilization is  
1007 impaired in motion-blind flies. *J. Exp. Biol.* *224*.
- 1008 Lien, A.D., and Scanziani, M. (2018). Cortical direction selectivity emerges at convergence of  
1009 thalamic synapses. *Nature* *558*, 80–86.
- 1010 Long, M.A., and Fee, M.S. (2008). Using temperature to analyse temporal dynamics in the  
1011 songbird motor pathway. *Nature* *456*, 189–194.
- 1012 Long, M.A., Jin, D.Z., and Fee, M.S. (2010). Support for a synaptic chain model of neuronal  
1013 sequence generation. *Nature* *468*, 394–399.
- 1014 Luo, L., Callaway, E.M., and Svoboda, K. (2018). Genetic dissection of neural circuits: A decade  
1015 of progress. *Neuron* *98*, 256–281.
- 1016 Maisak, M.S., Haag, J., Ammer, G., Serbe, E., Meier, M., Leonhardt, A., Schilling, T., Bahl, A.,  
1017 Rubin, G.M., Nern, A., et al. (2013). A directional tuning map of *Drosophila* elementary motion  
1018 detectors. *Nature* *500*, 212–216.
- 1019 Mano, O., Creamer, M.S., Matulis, C.A., Salazar-Gatzimas, E., Chen, J., Zavatone-Veth, J.A.,  
1020 and Clark, D.A. (2019). Using slow frame rate imaging to extract fast receptive fields. *Nat.*  
1021 *Commun.* *10*, 4979.
- 1022 Marder, E., and Goaillard, J.-M. (2006). Variability, compensation and homeostasis in neuron  
1023 and network function. *Nat. Rev. Neurosci.* *7*, 563–574.
- 1024 Marmarelis, V.Z. (1993). Identification of nonlinear biological systems using Laguerre  
1025 expansions of kernels. *Ann. Biomed. Eng.* *21*, 573–589.
- 1026 Marty, A. (1981). Ca-dependent K channels with large unitary conductance in chromaffin cell  
1027 membranes. *Nature* *291*, 497–500.
- 1028 Matulis, C.A., Chen, J., Gonzalez-Suarez, A.D., Behnia, R., and Clark, D.A. (2020).  
1029 Heterogeneous Temporal Contrast Adaptation in *Drosophila* Direction-Selective Circuits. *Curr.*  
1030 *Biol.* *30*, 222–236.e6.

- 1031 Mazor, O., and Laurent, G. (2005). Transient dynamics versus fixed points in odor  
1032 representations by locust antennal lobe projection neurons. *Neuron* 48, 661–673.
- 1033 Meier, M., and Borst, A. (2019). Extreme compartmentalization in a drosophila amacrine cell.  
1034 *Curr. Biol.* 29, 1545–1550.e2.
- 1035 Nitabach, M.N., Wu, Y., Sheeba, V., Lemon, W.C., Strumbos, J., Zelensky, P.K., White, B.H.,  
1036 and Holmes, T.C. (2006). Electrical hyperexcitation of lateral ventral pacemaker neurons  
1037 desynchronizes downstream circadian oscillators in the fly circadian circuit and induces multiple  
1038 behavioral periods. *J. Neurosci.* 26, 479–489.
- 1039 Pallotta, B.S., Magleby, K.L., and Barrett, J.N. (1981). Single channel recordings of Ca<sup>2+</sup>-  
1040 activated K<sup>+</sup> currents in rat muscle cell culture. *Nature* 293, 471–474.
- 1041 Pattillo, J.M., Yazejian, B., DiGregorio, D.A., Vergara, J.L., Grinnell, A.D., and Meriney, S.D.  
1042 (2001). Contribution of presynaptic calcium-activated potassium currents to transmitter release  
1043 regulation in cultured *Xenopus* nerve-muscle synapses. *Neuroscience* 102, 229–240.
- 1044 Pelli, D.G. (1997). The VideoToolbox software for visual psychophysics: transforming numbers  
1045 into movies. *Spat Vis* 10, 437–442.
- 1046 Perkins, L.A., Holderbaum, L., Tao, R., Hu, Y., Sopko, R., McCall, K., Yang-Zhou, D.,  
1047 Flockhart, I., Binari, R., Shim, H.-S., et al. (2015). The transgenic rna1 project at harvard medical  
1048 school: resources and validation. *Genetics* 201, 843–852.
- 1049 Pologruto, T.A., Sabatini, B.L., and Svoboda, K. (2003). ScanImage: flexible software for  
1050 operating laser scanning microscopes. *Biomed Eng Online* 2, 13.
- 1051 Prinz, A.A., Bucher, D., and Marder, E. (2004). Similar network activity from disparate circuit  
1052 parameters. *Nat. Neurosci.* 7, 1345–1352.
- 1053 Quraishi, I.H., Stern, S., Mangan, K.P., Zhang, Y., Ali, S.R., Mercier, M.R., Marchetto, M.C.,  
1054 McLachlan, M.J., Jones, E.M., Gage, F.H., et al. (2019). An Epilepsy-Associated KCNT1  
1055 Mutation Enhances Excitability of Human iPSC-Derived Neurons by Increasing Slack KNa  
1056 Currents. *J. Neurosci.* 39, 7438–7449.
- 1057 Reichardt, W. (1961). Autocorrelation, a principle for the evaluation of sensory information by  
1058 the central nervous system. In *Symposium on Principles of Sensory Communication 1959*, W.A.  
1059 Rosenblith, ed. (The MIT Press), pp. 302–317.
- 1060 Sah, P., and Faber, E.S.L. (2002). Channels underlying neuronal calcium-activated potassium  
1061 currents. *Prog. Neurobiol.* 66, 345–353.
- 1062 Salazar-Gatzimas, E., Chen, J., Creamer, M.S., Mano, O., Mandel, H.B., Matulis, C.A.,  
1063 Pottackal, J., and Clark, D.A. (2016). Direct measurement of correlation responses in drosophila  
1064 elementary motion detectors reveals fast timescale tuning. *Neuron* 92, 227–239.
- 1065 Salazar-Gatzimas, E., Agrochao, M., Fitzgerald, J.E., and Clark, D.A. (2018). The neuronal basis



- 1066 of an illusory motion percept is explained by decorrelation of parallel motion pathways. *Curr.*  
1067 *Biol.* *28*, 3748–3762.e8.
- 1068 Schilling, T., and Borst, A. (2015). Local motion detectors are required for the computation of  
1069 expansion flow-fields. *Biol. Open* *4*, 1105–1108.
- 1070 Schulz, D.J., Goillard, J.-M., and Marder, E. (2006). Variable channel expression in identified  
1071 single and electrically coupled neurons in different animals. *Nat. Neurosci.* *9*, 356–362.
- 1072 Shafer, O.T., and Yao, Z. (2014). Pigment-Dispersing Factor Signaling and Circadian Rhythms  
1073 in Insect Locomotor Activity. *Curr. Opin. Insect Sci.* *1*, 73–80.
- 1074 Shinomiya, K., Huang, G., Lu, Z., Parag, T., Xu, C.S., Aniceto, R., Ansari, N., Cheatham, N.,  
1075 Lauchie, S., Neace, E., et al. (2019). Comparisons between the ON- and OFF-edge motion  
1076 pathways in the *Drosophila* brain. *Elife* *8*.
- 1077 Silies, M., Gohl, D.M., and Clandinin, T.R. (2014). Motion-detecting circuits in flies: coming  
1078 into view. *Annu. Rev. Neurosci.* *37*, 307–327.
- 1079 Stavenga, D.G. (2003). Angular and spectral sensitivity of fly photoreceptors. I. Integrated facet  
1080 lens and rhabdomere optics. *J. Comp. Physiol. A, Neuroethol. Sens. Neural Behav. Physiol.* *189*,  
1081 1–17.
- 1082 Strother, J.A., Nern, A., and Reiser, M.B. (2014). Direct observation of ON and OFF pathways  
1083 in the *Drosophila* visual system. *Curr. Biol.* *24*, 976–983.
- 1084 Strother, J.A., Wu, S.-T., Wong, A.M., Nern, A., Rogers, E.M., Le, J.Q., Rubin, G.M., and  
1085 Reiser, M.B. (2017). The emergence of directional selectivity in the visual motion pathway of  
1086 *drosophila*. *Neuron* *94*, 168–182.e10.
- 1087 Strother, J.A., Wu, S.-T., Rogers, E.M., Eliason, J.L.M., Wong, A.M., Nern, A., and Reiser,  
1088 M.B. (2018). Behavioral state modulates the ON visual motion pathway of *Drosophila*. *Proc.*  
1089 *Natl. Acad. Sci. USA* *115*, E102–E111.
- 1090 Sun, X.-P., Yazejian, B., and Grinnell, A.D. (2004). Electrophysiological properties of BK  
1091 channels in *Xenopus* motor nerve terminals. *J. Physiol. (Lond.)* *557*, 207–228.
- 1092 Suver, M.P., Mamiya, A., and Dickinson, M.H. (2012). Octopamine neurons mediate flight-  
1093 induced modulation of visual processing in *Drosophila*. *Curr. Biol.* *22*, 2294–2302.
- 1094 Sweeney, S.T., Broadie, K., Keane, J., Niemann, H., and O’Kane, C.J. (1995). Targeted  
1095 expression of tetanus toxin light chain in *Drosophila* specifically eliminates synaptic  
1096 transmission and causes behavioral defects. *Neuron* *14*, 341–351.
- 1097 Takemura, S., Bharioke, A., Lu, Z., Nern, A., Vitaladevuni, S., Rivlin, P.K., Katz, W.T., Olbris,  
1098 D.J., Plaza, S.M., Winston, P., et al. (2013). A visual motion detection circuit suggested by  
1099 *Drosophila* connectomics. *Nature* *500*, 175–181.

- 1100 Takemura, S.-Y., Nern, A., Chklovskii, D.B., Scheffer, L.K., Rubin, G.M., and Meinertzhagen,  
1101 I.A. (2017). The comprehensive connectome of a neural substrate for “ON” motion detection in  
1102 *Drosophila*. *Elife* 6.
- 1103 Tang, L.S., Goeritz, M.L., Caplan, J.S., Taylor, A.L., Fisek, M., and Marder, E. (2010). Precise  
1104 temperature compensation of phase in a rhythmic motor pattern. *PLoS Biol.* 8.
- 1105 Torre, and Poggio (1978). A Synaptic Mechanism Possibly Underlying Directional Selectivity to  
1106 Motion. *Proceedings of the Royal Society of London*.
- 1107 Wilson, R.I., Turner, G.C., and Laurent, G. (2004). Transformation of olfactory representations  
1108 in the *Drosophila* antennal lobe. *Science* 303, 366–370.
- 1109 Yang, B., Desai, R., and Kaczmarek, L.K. (2007). Slack and Slick K(Na) channels regulate the  
1110 accuracy of timing of auditory neurons. *J. Neurosci.* 27, 2617–2627.
- 1111 Yang, H.H., St-Pierre, F., Sun, X., Ding, X., Lin, M.Z., and Clandinin, T.R. (2016). Subcellular  
1112 imaging of voltage and calcium signals reveals neural processing in vivo. *Cell* 166, 245–257.
- 1113 Zavatone-Veth, J.A., Badwan, B.A., and Clark, D.A. (2020). A minimal synaptic model for  
1114 direction selective neurons in *Drosophila*. *J. Vis.* 20, 2.
- 1115

1 Supplementary Materials for

2

3 **Manipulating neural dynamics to tune motion detection**

4 Aneysis D. Gonzalez-Suarez<sup>1</sup>, Jacob A. Zavatone-Veth<sup>2,3</sup>, Juyue Chen<sup>1</sup>, Catherine A. Matulis<sup>4</sup>,  
5 Bara A. Badwan<sup>5</sup>, and Damon A. Clark<sup>1,4,6,7,\*</sup>

6

7 <sup>1</sup>Interdepartmental Neuroscience Program; Yale University, New Haven, CT 06511, USA.

8 <sup>2</sup>Department of Physics, Harvard University; Cambridge, MA 02138, USA.

9 <sup>3</sup>Center for Brain Science, Harvard University; Cambridge, MA 02138, USA.

10 <sup>4</sup>Department of Physics, Yale University; New Haven, CT 06511, USA.

11 <sup>5</sup>School of Engineering and Applied Science, Yale University; New Haven, CT 06511, USA.

12 <sup>6</sup>Department of Molecular, Cellular, and Developmental Biology, Yale University; New Haven,  
13 CT 06511, USA.

14 <sup>7</sup>Department of Neuroscience, Yale University; New Haven, CT 06511, USA.

15 \*Corresponding author.

16

17

18 **This PDF file includes:**

19

20 Figures S1-15

21 **Supplementary Text**  
22

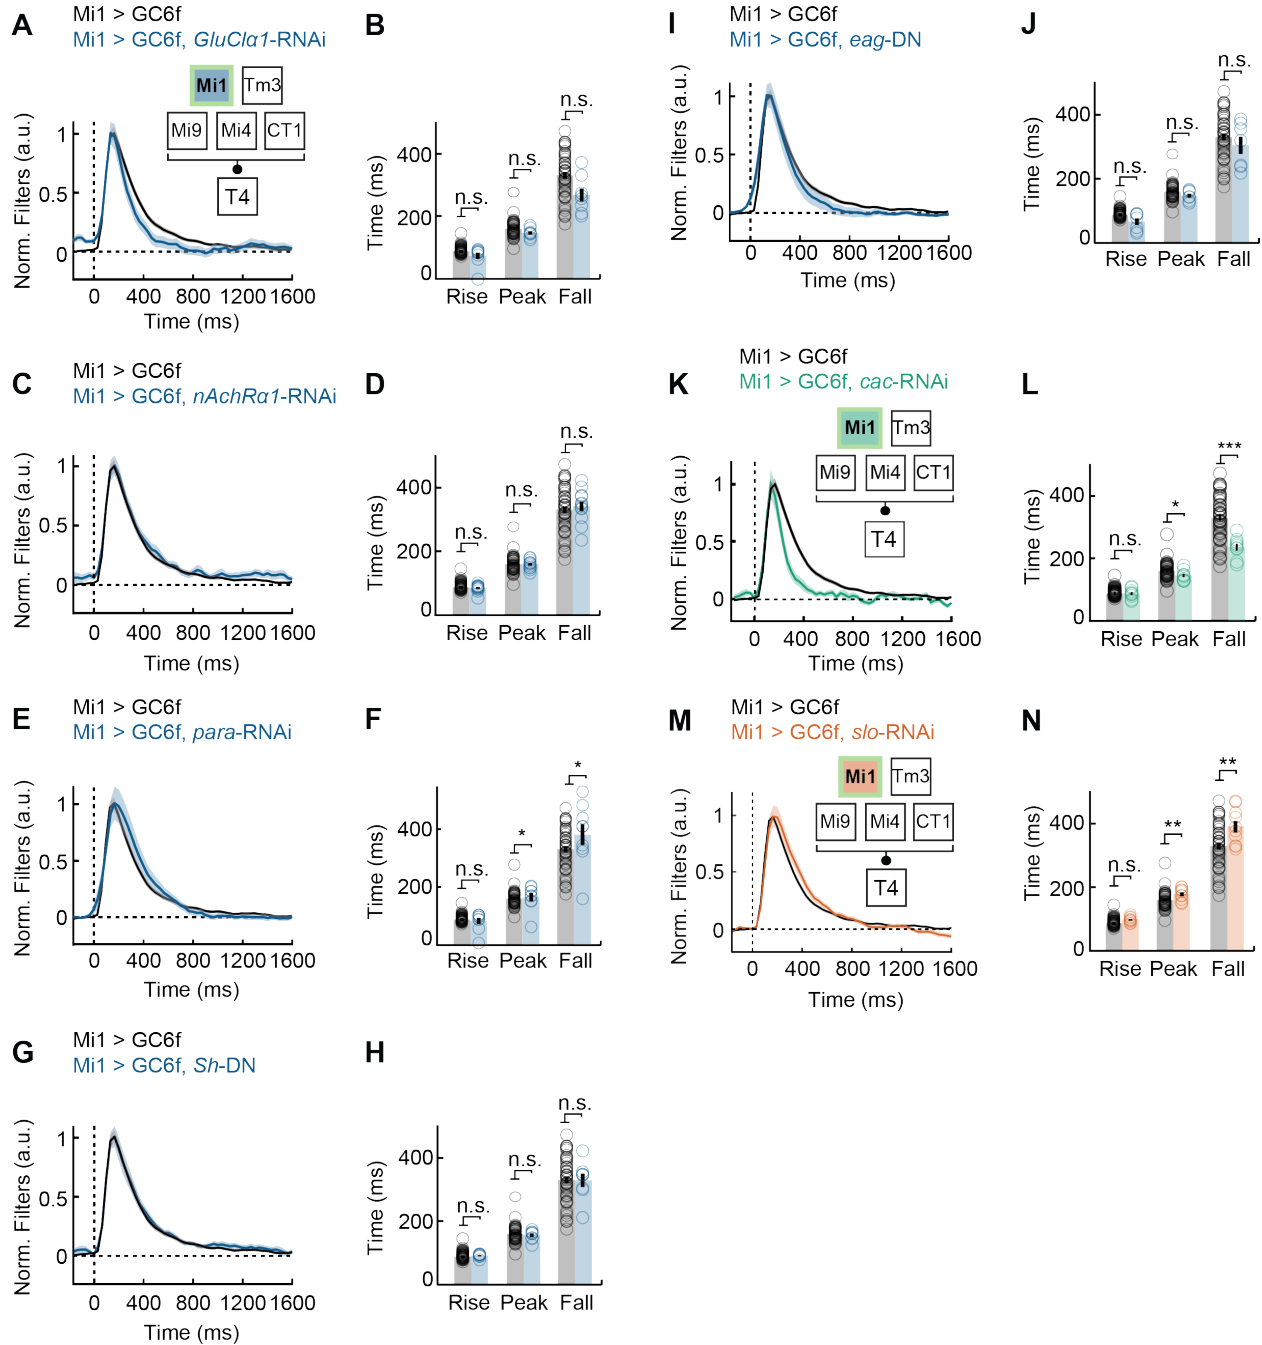

23 **Figure S1. Suppression of *slowpoke* and *cacophony* expression significantly alters Mi1 filter**  
24 **dynamics.**  
25

- 26 (A) Filters of Mi1 with the glutamate-gated Cl<sup>-</sup> channel *GluClα1* knocked-down (Mi1 >  
27 GC6f, *GluClα1*-RNAi, n = 9), compared to wildtype Mi1 (Mi1 > GC6f, n = 68). Lines  
28 are mean ± SEM.  
29 (B) Filter dynamics quantification of (A): filter's half-rise (rise), peak, and half-fall (fall)  
30 times averaged across flies.

- 31 (C) As in (A), but for Mi1 with the nicotinic acetylcholine  $\alpha 1$  receptor knocked-down (Mi1 >  
32 GC6f, *nAchRa1*-RNAi, n = 12), compared to wildtype Mi1 (Mi1 > GC6f, n = 68).
- 33 (D) As in (B), but for filters in (C).
- 34 (E) As in (A), but for Mi1 with the voltage-gated Na<sup>+</sup> channel *para* knocked-down (Mi1 >  
35 GC6f, *para*-RNAi, n = 9), compared to wildtype Mi1 (Mi1 > GC6f, n = 68).
- 36 (F) As in (B), but for filters in (E).
- 37 (G) As in (A), but for Mi1 with a dominant negative mutation in the voltage-gated K<sup>+</sup> channel  
38 *Shaker* (Mi1 > GC6f, *Sh*-DN, n = 8), compared to wildtype Mi1 (Mi1 > GC6f, n = 68).
- 39 (H) As in (B), but for filters in (G).
- 40 (I) As in (A), but for Mi1 with a dominant negative mutation in the voltage-gated delayed  
41 rectifier K<sup>+</sup> channel *Ether-a-go-go* (Mi1 > GC6f, *eag*-DN, n = 7), compared to wildtype  
42 Mi1 (Mi1 > GC6f, n = 68).
- 43 (J) As in (B), but for filters in (I).
- 44 (K) As in (A), but for Mi1 with the voltage-gated Ca<sup>2+</sup> channel *cacophony* (*cac*), knocked-  
45 down (Mi1 > GC6f, *cac*-RNAi, n = 9), compared to wildtype Mi1 (Mi1 > GC6f, n = 68).
- 46 (L) As in (B), but for filters in (K).
- 47 (M) As in (A), but for Mi1 with the voltage- and calcium-gated K<sup>+</sup> channel *slowpoke* (*slo*),  
48 knocked-down (Mi1 > GC6f, *slo*-RNAi, n = 19), compared to wildtype Mi1 (Mi1 >  
49 GC6f, n = 68).
- 50 (N) As in (B), but for filters in (M). Note that in cases where genetic manipulations did not  
51 elicit an observable phenotype, we do not interpret the absence of a change as indicating  
52 that the gene is not necessary for wildtype dynamics, since there are a host of reasons  
53 why such experiments could have failed to show a phenotype. (\* p<0.05, \*\* p<0.01, \*\*\*  
54 p<0.001 by Wilcoxon signed-rank tests across flies.)  
55  
56



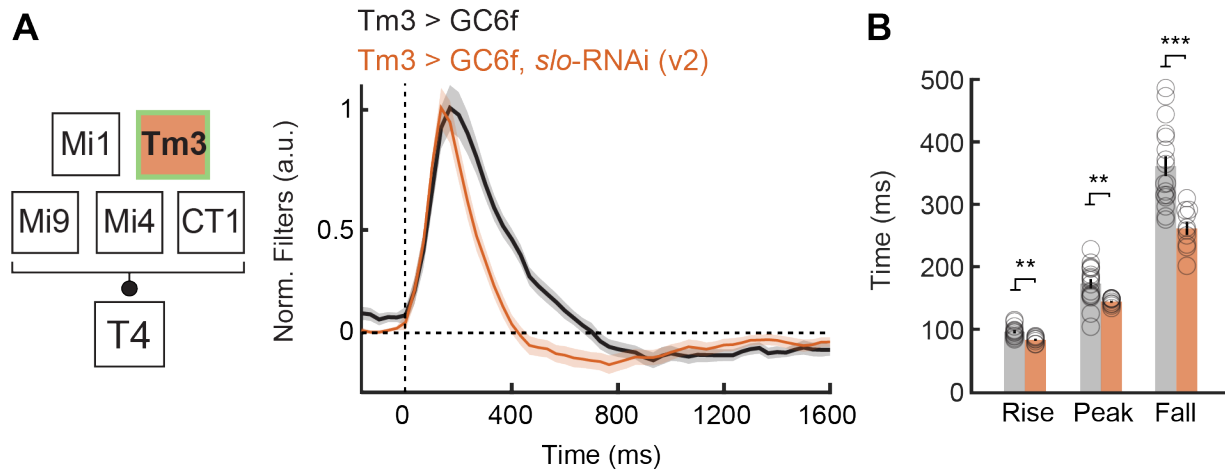

57  
58  
59  
60  
61  
62  
63  
64  
65  
66  
67  
68

**Figure S2. Independent *slowpoke* knock-down in Tm3 speeds up the cell's dynamics.**

- (A)** Filters of Tm3 with the Ca<sup>2+</sup>-gated K<sup>+</sup> channel *slowpoke* (*slo*) knocked-down (*slo*-RNAi) (Tm3 > GC6f, *slo*-RNAi (v2), n = 10) compared to wildtype Tm3 (Tm3 > GC6f, n = 17). This *slo*-RNAi construct was obtained from an independent RNAi library (VDRC, labeled v2 here) (Dietzl et al., 2007). Lines are mean ± SEM.
- (B)** Filter dynamics quantification of (A): filter's half-rise (rise), peak, and half-fall (fall) times averaged across flies. A single outlying fly of genotype Tm3 > GC6f was removed from the analysis of fall times, since its fall time was computed to be ~1500 ms. This did not affect the significance of the difference shown. (\* p<0.05, \*\* p<0.01, \*\*\* p<0.001 by Wilcoxon signed-rank tests across flies.)

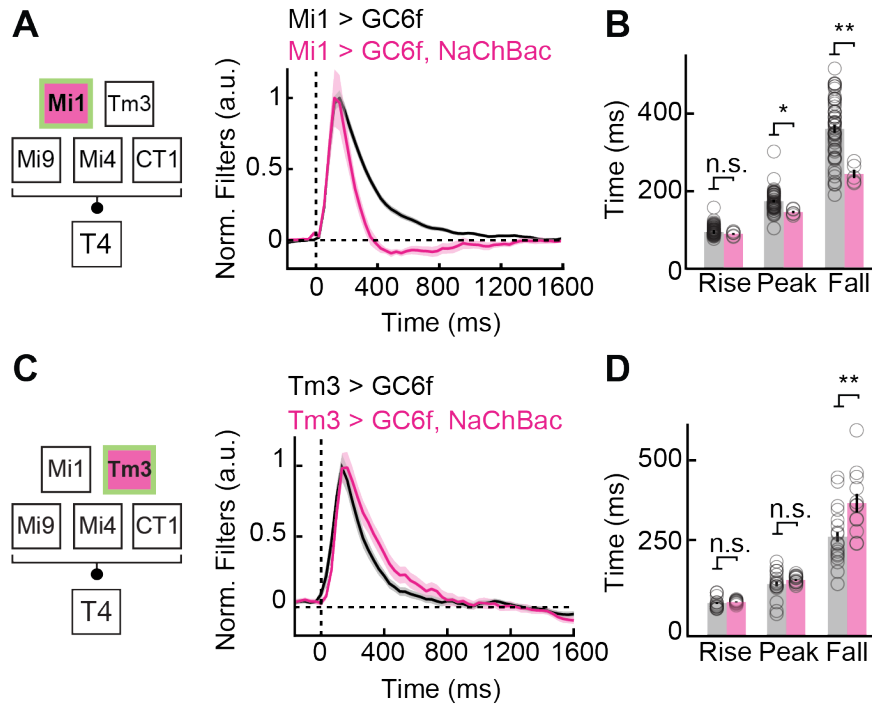

69  
70  
71  
72  
73  
74  
75  
76  
77  
78  
79  
80  
81  
82

**Figure S3. Expression of NaChBac speeds up Mi1 dynamics, but slows down Tm3 dynamics.**

- (A) Filters of Mi1 expressing the bacterial, voltage-gated Na<sup>+</sup> channel NaChBac (Mi1 > GC6f, NaChBac, n = 5), compared to wildtype Mi1 (Mi1 > GC6f, n = 68). Lines are mean ± SEM.
- (B) Filter dynamics quantification of (A): filter's half-rise (rise), peak, and half-fall (fall) times averaged across flies.
- (C) As in (A), but for Tm3 expressing NaChBac (Tm3 > GC6f, NaChBac, n = 15), compared to wildtype Tm3 (Tm3 > GC6f, n = 25).
- (D) As in (B), but for filters in (C). (\* p<0.05, \*\* p<0.01, \*\*\* p<0.001 by Wilcoxon signed-rank tests across flies.)

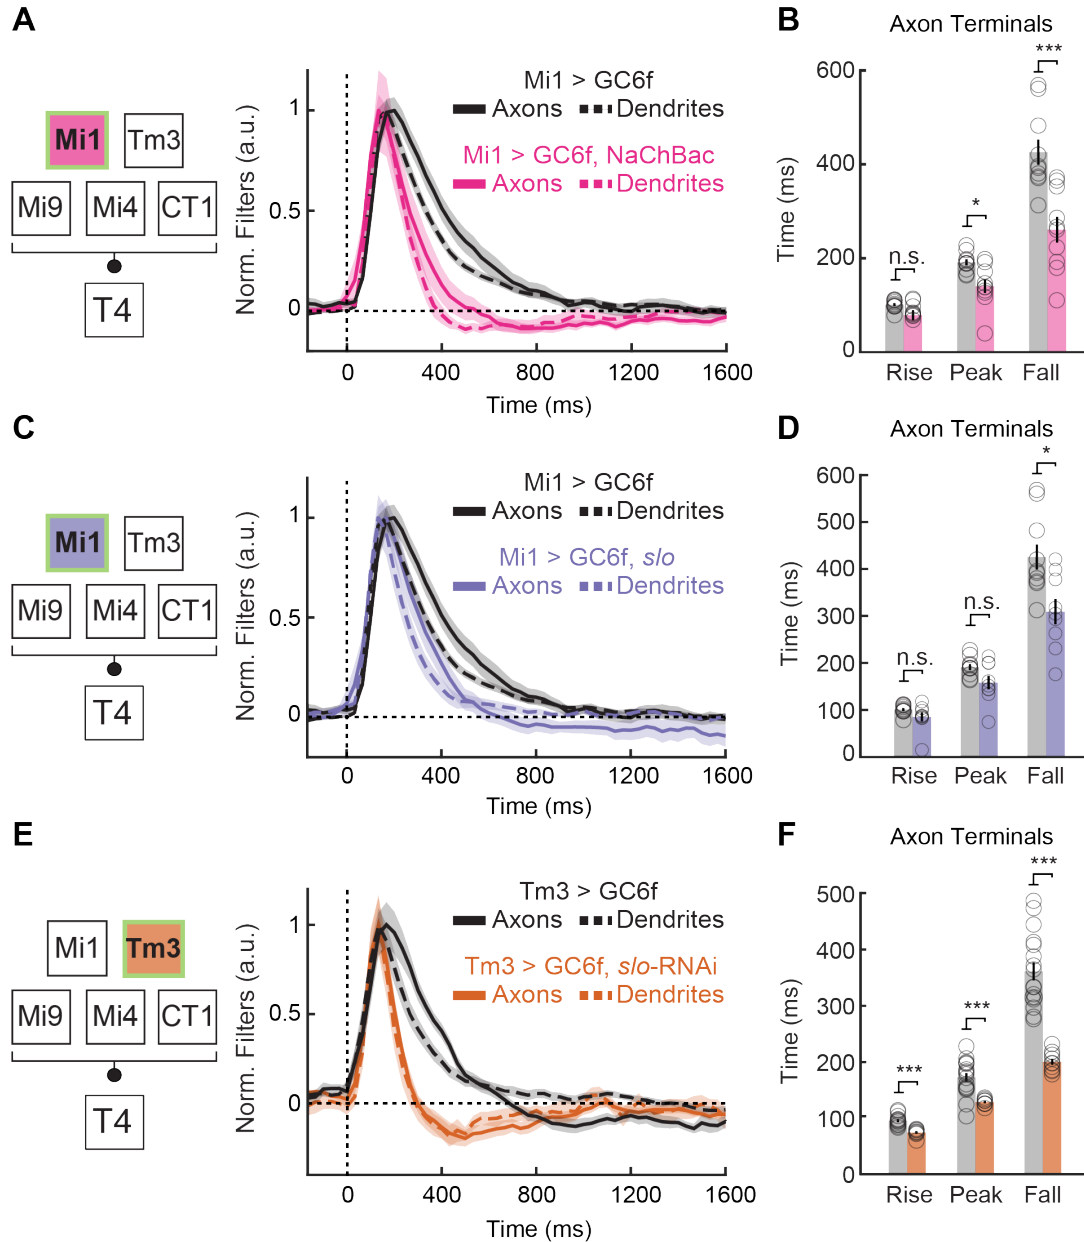

83  
84 **Figure S4. Genetic perturbations of Mi1 and Tm3 affect dendrite and axon dynamics**  
85 **similarly.**

- 86 (A) Dendrite filters of Mi1 expressing the bacterial, voltage-gated Na<sup>+</sup> channel NaChBac  
87 (Mi1 > GC6f, NaChBac, n = 7), and axons filters of Mi1 expressing NaChBac (Mi1 >  
88 GC6f, NaChBac, n = 10), compared to wildtype Mi1 dendrites (Mi1 > GC6f, n = 68) and  
89 axons (Mi1 > GC6f, n = 10). Lines are mean ± SEM.
- 90 (B) Axon filter dynamics quantification of (A): filter's half-rise (rise), peak, and half-fall  
91 (fall) times averaged across flies.
- 92 (C) As in (A), but for Mi1 over-expressing the Ca<sup>2+</sup>-gated K<sup>+</sup> channel *slowpoke* (*slo*),  
93 (dendrites: Mi1 > GC6f, *slo*, n = 16; axons: Mi1 > GC6f, *slo*, n = 11), compared to  
94 wildtype Mi1 (dendrites: Mi1 > GC6f, n = 68; axons: Mi1 > GC6f, n = 10).
- 95 (D) As in (B), but for filters displayed in (C).

- 96 **(E)** As in (A), but for Tm3 with *slo* knock-down (dendrites: Tm3 > GC6f, *slo*-RNAi, n = 19;  
97 axons: Tm3 > GC6f, *slo*-RNAi, n = 11), compared to wildtype Tm3 (dendrites: Tm3 >  
98 GC6f, n = 25; axons: Tm3 > GC6f, n = 17). A single outlying fly of genotype Tm3 >  
99 GC6f was removed from the analysis of fall times, since its fall time was computed to be  
100 ~1500 ms. This did not affect the significance of the difference shown.
- 101 **(F)** As in (B), but for filters displayed in (E). (\* p<0.05, \*\* p<0.01, \*\*\* p<0.001 by  
102 Wilcoxon signed-rank tests across flies.)

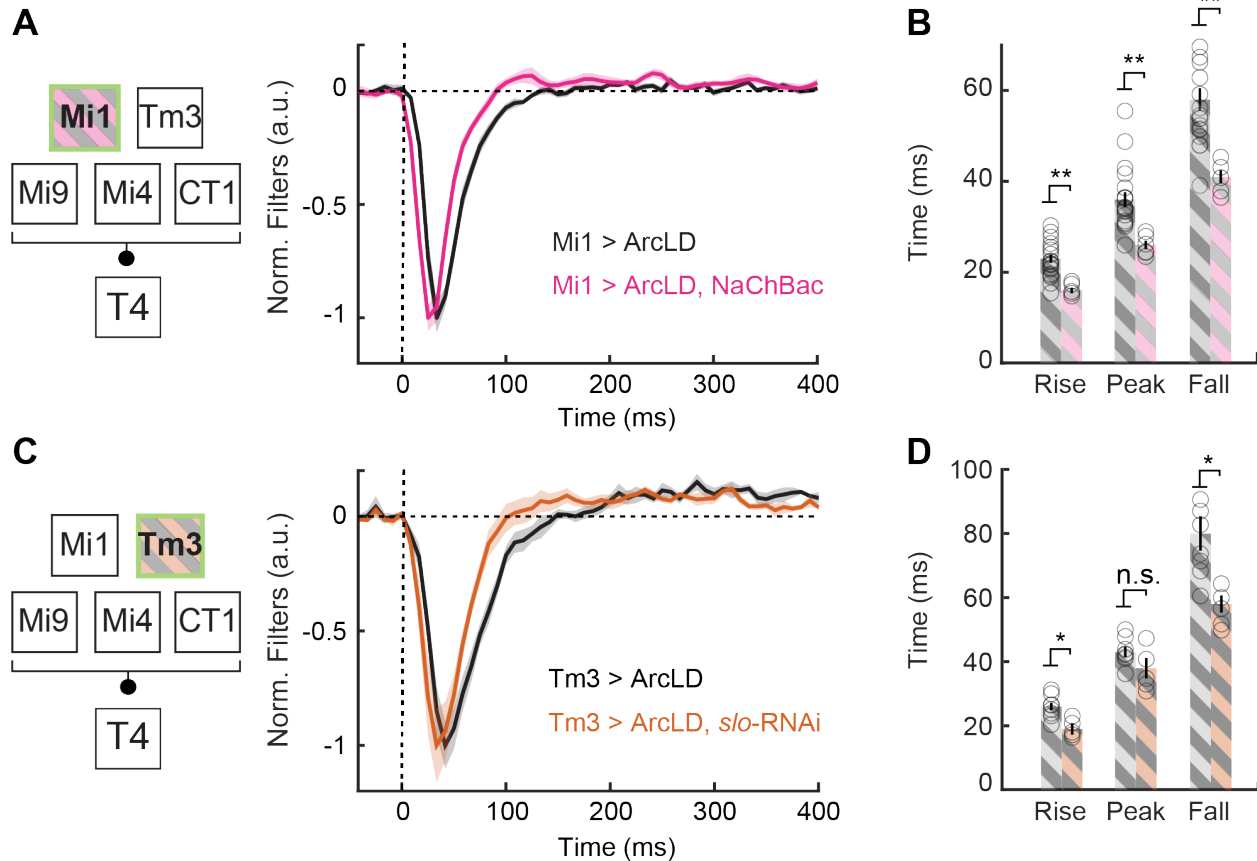

103  
104 **Figure S5. Expressing NaChBac and over-expressing *slowpoke* speeds up Mi1 and Tm3**  
105 **membrane potential response dynamics.**

- 106 **(A)** Voltage filters of Mi1 expressing the bacterial, voltage-gated Na<sup>+</sup> channel NaChBac (Mi1  
107 > ArcLD, NaChBac, n = 5), compared to wildtype Mi1 (Mi1 > ArcLD, n = 19). Lines are  
108 mean ± SEM. Note the timescale differences from calcium filters. ArcLight fluoresces  
109 less at depolarized membrane potentials.
- 110 **(B)** Filter dynamics quantification of (A): filter's half-rise (rise), peak (max), and half-fall  
111 (fall) averaged across flies.
- 112 **(C)** As in (A), but for Tm3 expressing an RNAi to knock-down the Ca<sup>2+</sup>-gated K<sup>+</sup>  
113 channel *slowpoke* (*slo*) (Tm3 > ArcLD, *slo*-RNAi, n = 5), compared to wildtype Tm3 (Tm3 >  
114 ArcLD, n = 8).
- 115 **(D)** As in (B), but for filters in (C). (\* p<0.05, \*\* p<0.01, \*\*\* p<0.001 by Wilcoxon signed-  
116 rank tests across flies.)  
117  
118  
119



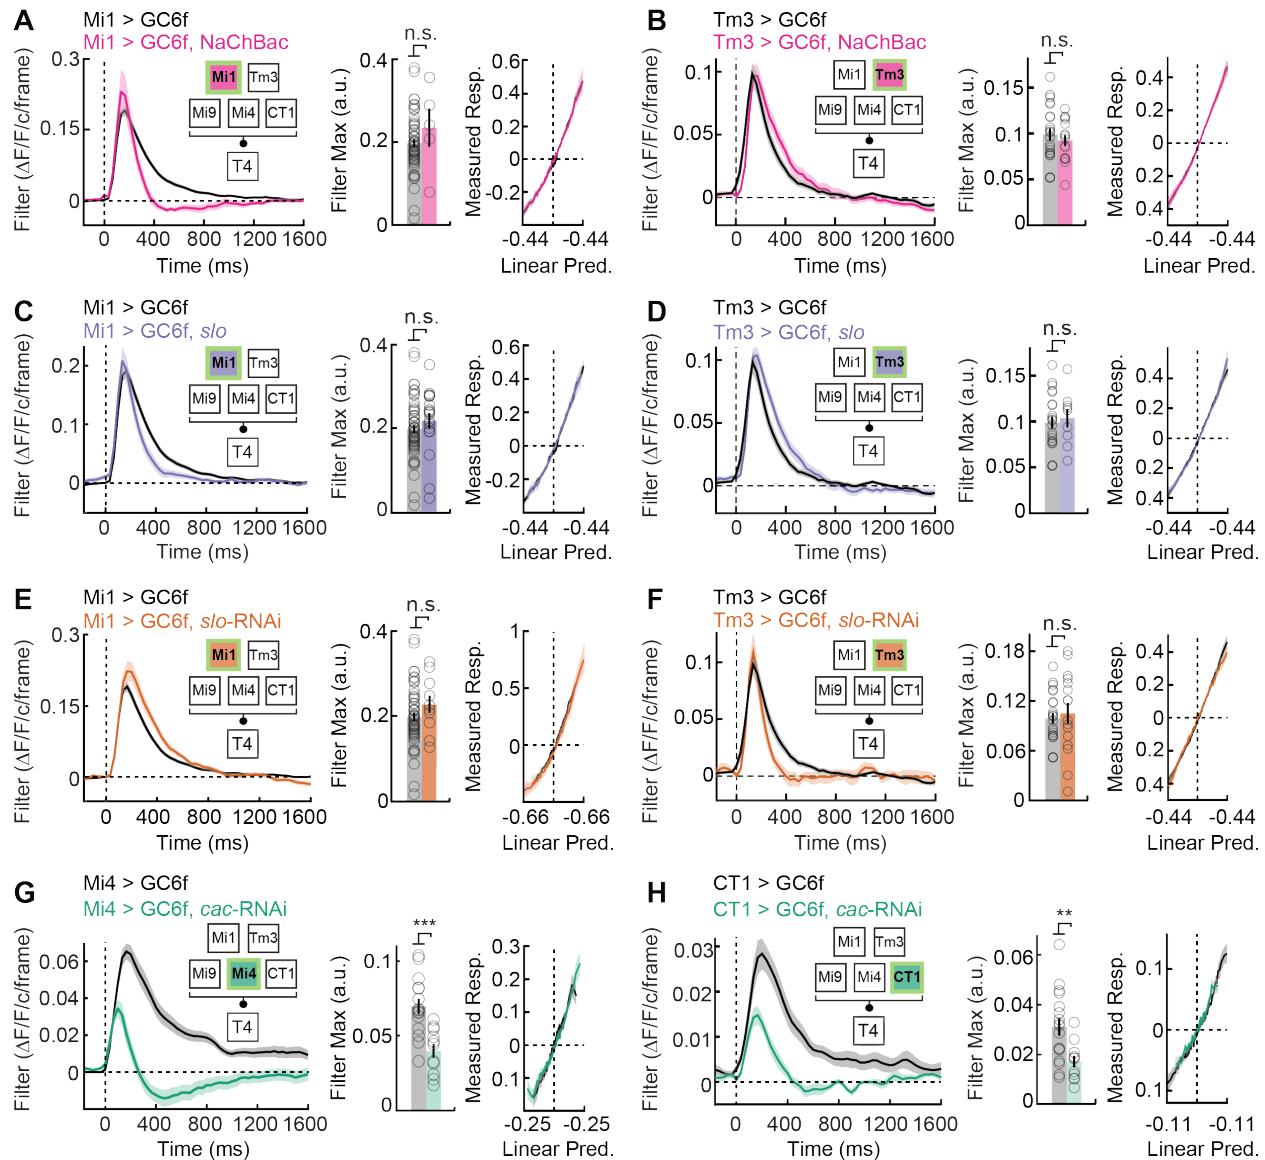

120  
121  
122  
123  
124  
125  
126  
127  
128  
129  
130  
131  
132  
133  
134

**Figure S6. Genetic perturbations of Mi1, Tm3, Mi4, and CT1 did not strongly alter nonlinear transformations, but altered Mi4 and CT1 filter amplitude.**

- (A) *Left:* un-normalized Mi1 filters expressing the bacterial voltage-gated  $Na^+$  channel NaChBac ( $Mi1 > GC6f, NaChBac$ ,  $n = 7$ ), compared to wildtype Mi1 ( $Mi1 > GC6f$ ,  $n = 68$ ). (Lines are mean  $\pm$  SEM). Unit frames are defined as 1/30 of a second (see Methods); *Middle:* quantified maximum amplitude for filters in (A, left), on a per fly bases; *Right:* extracted nonlinearities for filters in (A, right) are based on the measured response and the linear prediction with normalized variance (see Methods).
- (B) As in (A), but for Tm3 expressing NaChBac ( $Tm3 > GC6f, NaChBac$ ,  $n = 15$ ), compared to wildtype Tm3 ( $Tm3 > GC6f$ ,  $n = 25$ ).
- (C) As in (A), but for Mi1 over-expressing the  $Ca^{2+}$ -gated  $K^+$  channel *slowpoke* (*slo*) ( $Mi1 > GC6f, slo$ ,  $n = 16$ ), compared to wildtype Mi1 ( $Mi1 > GC6f$ ,  $n = 68$ ).
- (D) As in (B), but for Tm3 over-expressing *slo* ( $Tm3 > GC6f, slo$ ,  $n = 8$ ), compared to wildtype Tm3 ( $Tm3 > GC6f$ ,  $n = 25$ ).

- 135 **(E)** As in (A), but for Mi1 with *slo* knocked-down (Mi1 > GC6f, *slo* RNAi, n = 19),  
136 compared to wildtype Mi1 (Mi1 > GC6f, n = 68).
- 137 **(F)** As in (B), but for Tm3 with *slo* knocked-down (Tm3 > GC6f, *slo* RNAi, n = 19),  
138 compared to wildtype Tm3 (Tm3 > GC6f, n = 25).
- 139 **(G)** As in (A), but for Mi4 with the voltage-gated Ca<sup>2+</sup> channel *cacophony* (*cac*) knocked-  
140 down in Mi4 (Mi4 > GC6f, *cac* RNAi, n = 11), compared to wildtype Mi4 (Mi4 > GC6f,  
141 n = 15).
- 142 **(H)** As in (G), but for CT1 with *cac* knocked-down (CT1 > GC6f, *cac* RNAi, n = 11),  
143 compared to wildtype CT1 (CT1 > GC6f, n = 17). (\* p<0.05, \*\* p<0.01, \*\*\* p<0.001 by  
144 Wilcoxon signed-rank tests across flies.)

145

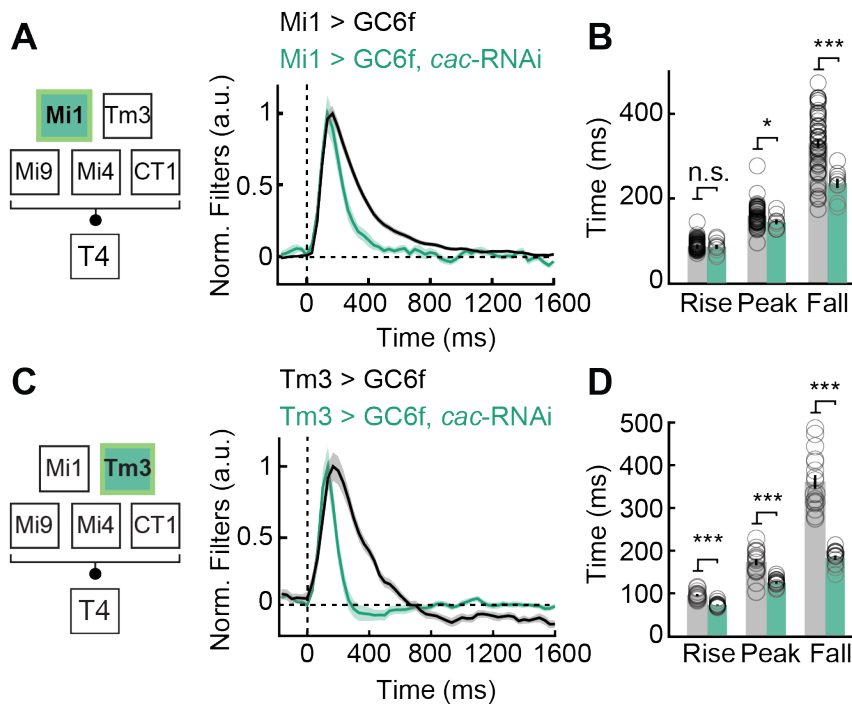

146

147

**Figure S7. Knocking-down *cacophony* in Mi1 and Tm3 speeds up filter dynamics in both.**

148

(A) Filters of Mi1 with the voltage-gated  $\text{Ca}^{2+}$  channel *cacophony* (*cac*), knocked-down (Mi1 > GC6f, *cac*-RNAi, n = 9), compared to wildtype Mi1 (Mi1 > GC6f, n = 68). Lines are mean  $\pm$  SEM.

149

150

(B) Filter dynamics quantification of (A): filter's half-rise (rise), peak, and half-fall (fall) times averaged across flies.

151

152

(C) As in (A), but for Tm3 expressing *cac*-RNAi (Tm3 > GC6f, *cac*-RNAi, n = 10), compared to wildtype Tm3 (Tm3 > GC6f, n = 17).

153

154

(D) As in (B), but for filters in (C). (\*  $p < 0.05$ , \*\*  $p < 0.01$ , \*\*\*  $p < 0.001$  by Wilcoxon signed-rank tests across flies.)

155

156

157

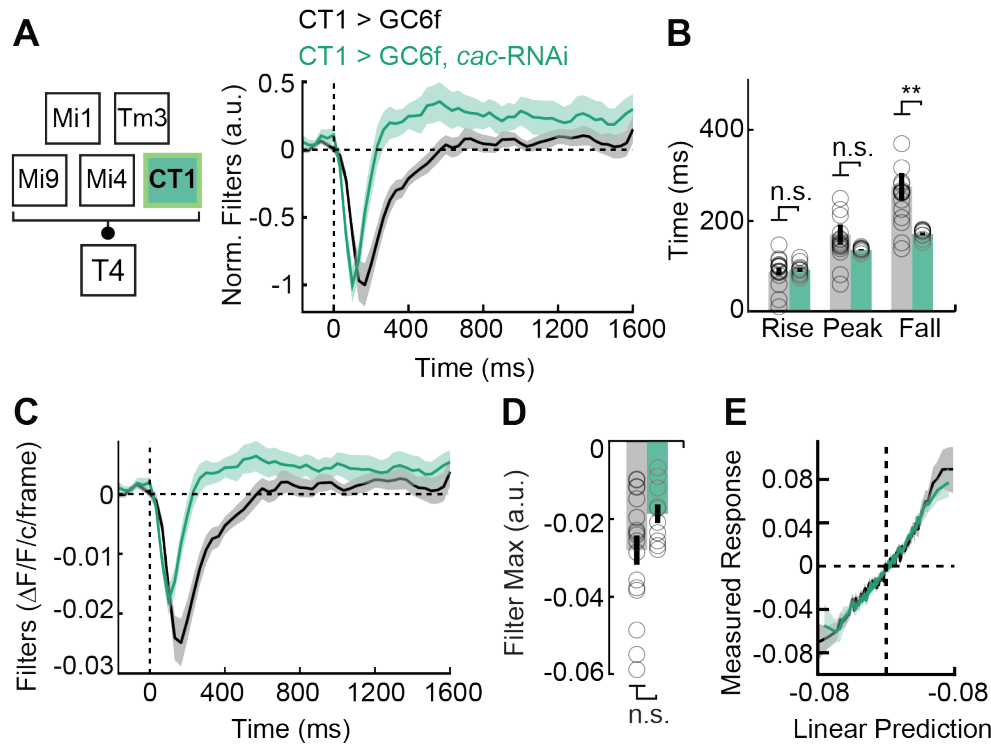

158  
159  
160  
161  
162  
163  
164  
165  
166  
167  
168  
169  
170  
171  
172  
173  
174  
175  
176

**Figure S8. Knocking-down *cacophony* in CT1 speeds up the filter dynamics in its lobula axon terminals.**

- (A) Filters of CT1 with the voltage-gated  $\text{Ca}^{2+}$  channel *cacophony* (*cac*) knocked-down (CT1 > GC6f, *cac*-RNAi, n = 10), compared to wildtype CT1 (CT1 > GC6f, n = 17). Lines are mean  $\pm$  SEM.
- (B) Filter dynamics quantification of (A): filter's half-rise (rise), peak, and half-fall (fall) times averaged across flies.
- (C) Un-normalized filters of CT1 expressing *cac*-RNAi expression (CT1 > GC6f, *cac*-RNAi, n = 10), compared to wildtype CT1 (CT1 > GC6f, n = 17). Unit frames are defined as 1/30 of a second (see Methods).
- (D) Quantified maximum amplitude for filters in (C), on a per fly bases.
- (E) Extracted nonlinearities based on measured responses and linear prediction for CT1 expressing *cac*-RNAi (CT1 > GC6f, *cac*-RNAi, n = 10), compared to wildtype CT1 (CT1 > GC6f, n = 17) (see Methods). (\*  $p < 0.05$ , \*\*  $p < 0.01$ , \*\*\*  $p < 0.001$  by Wilcoxon signed-rank tests across flies.)

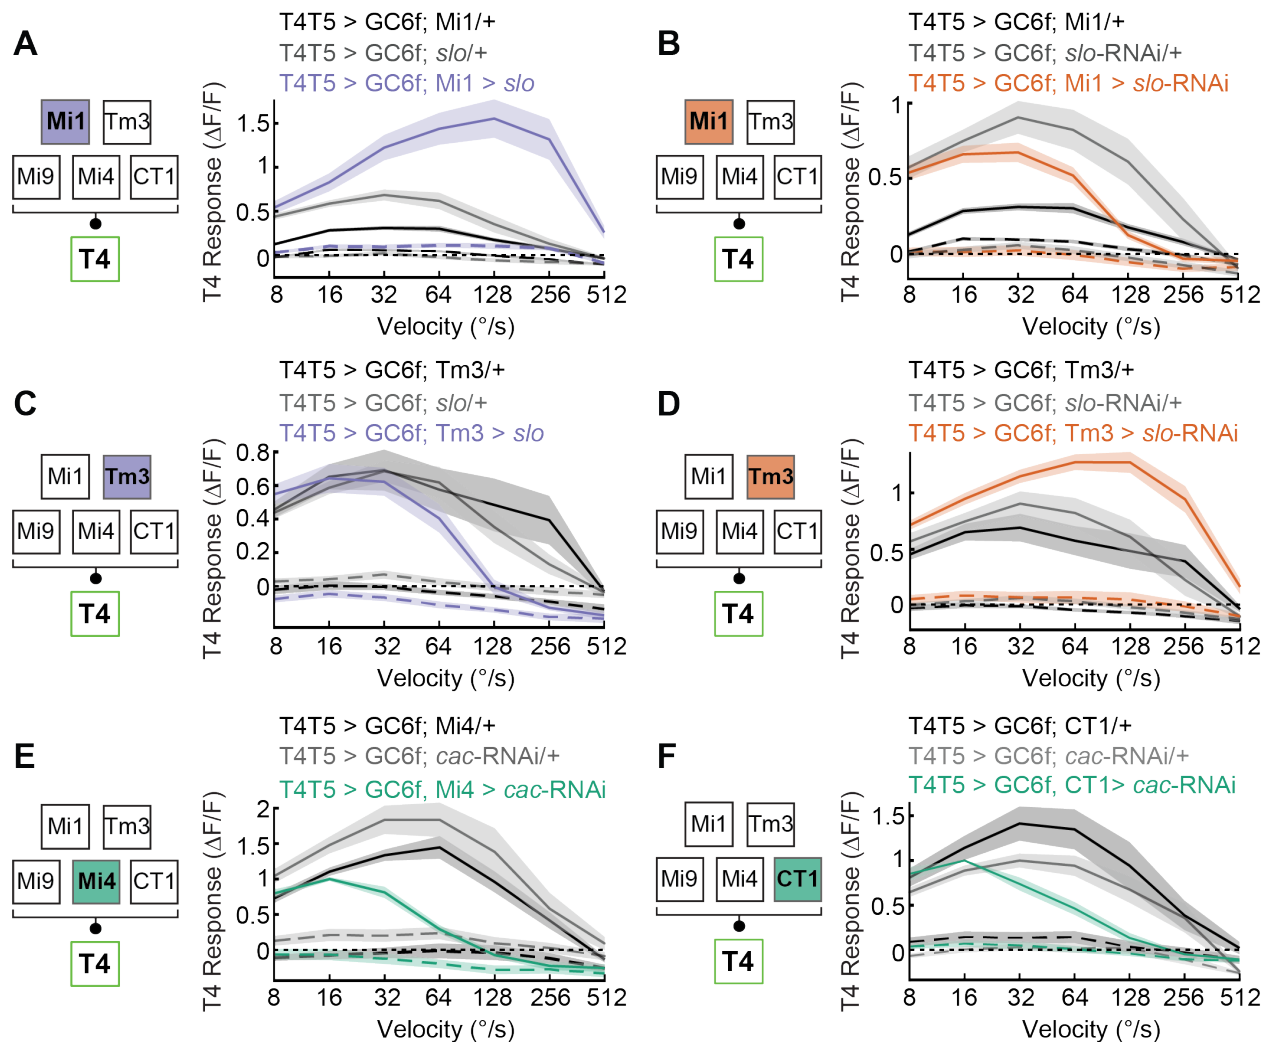

177  
178  
179  
180  
181  
182  
183  
184  
185  
186  
187  
188  
189  
190  
191  
192  
193  
194  
195

**Figure S9. T4 tuning curves to white bars moving in the preferred and null direction.**

- (A) T4 responses to white bars moving in the preferred direction (*solid lines*) and the null direction (*dashed lines*) for flies over-expressing the Ca<sup>2+</sup>-gated K<sup>+</sup> channel *slowpoke* (*slo*) (T4T5 > GC6f, Mi1 > *slo*, n = 9) compared to two genetic controls (T4T5 > GC6f; Mi1/+, n = 43 and T4T5 > GC6f; *slo*/+, n = 11). Lines are mean ± SEM.
- (B) As in (A), but for Mi1 expressing *slo*-RNAi (T4T5 > GC6f, Mi1 > *slo* RNAi, n = 7), compared to two genetic controls (T4T5 > GC6f; Mi1/+, n = 43 and T4T5 > GC6f; *slo* RNAi/+, n = 10).
- (C) As in (A), but for Tm3 over-expressing *slo* (T4T5 > GC6f, Tm3 > *slo*, n = 7), compared to two genetic controls (T4T5 > GC6f; Tm3/+, n = 11 and T4T5 > GC6f; *slo*/+, n = 11).
- (D) As in (A), but for Tm3 expressing *slo*-RNAi (T4T5 > GC6f, Tm3 > *slo*-RNAi, n = 12), compared to two genetic controls (T4T5 > GC6f; Tm3/+, n = 11 and T4T5 > GC6f; *slo*-RNAi/+, n = 10).
- (E) As in (A), but for Mi4 expressing RNAi to knock-down the voltage-gated Ca<sup>2+</sup> channel *cacophony* (*cac*) (T4T5 > GC6f, Mi4 > *cac*-RNAi, n = 8) compared to two genetic controls (T4T5 > GC6f; Mi4/+, n = 12 and T4T5 > GC6f; *cac*-RNAi/+, n = 8).
- (F) As in (A), but for CT1 expressing *cac*-RNAi (T4T5 > GC6f, CT1 > *cac*-RNAi, n = 7) compared to two genetic controls: T4T5 > GC6f; CT1/+ (n = 12) and T4T5 > GC6f; *cac*-

196 RNAi/+ (n = 8). (\* p<0.05, \*\* p<0.01, \*\*\* p<0.001 by Wilcoxon signed-rank tests across  
197 flies.)  
198  
199



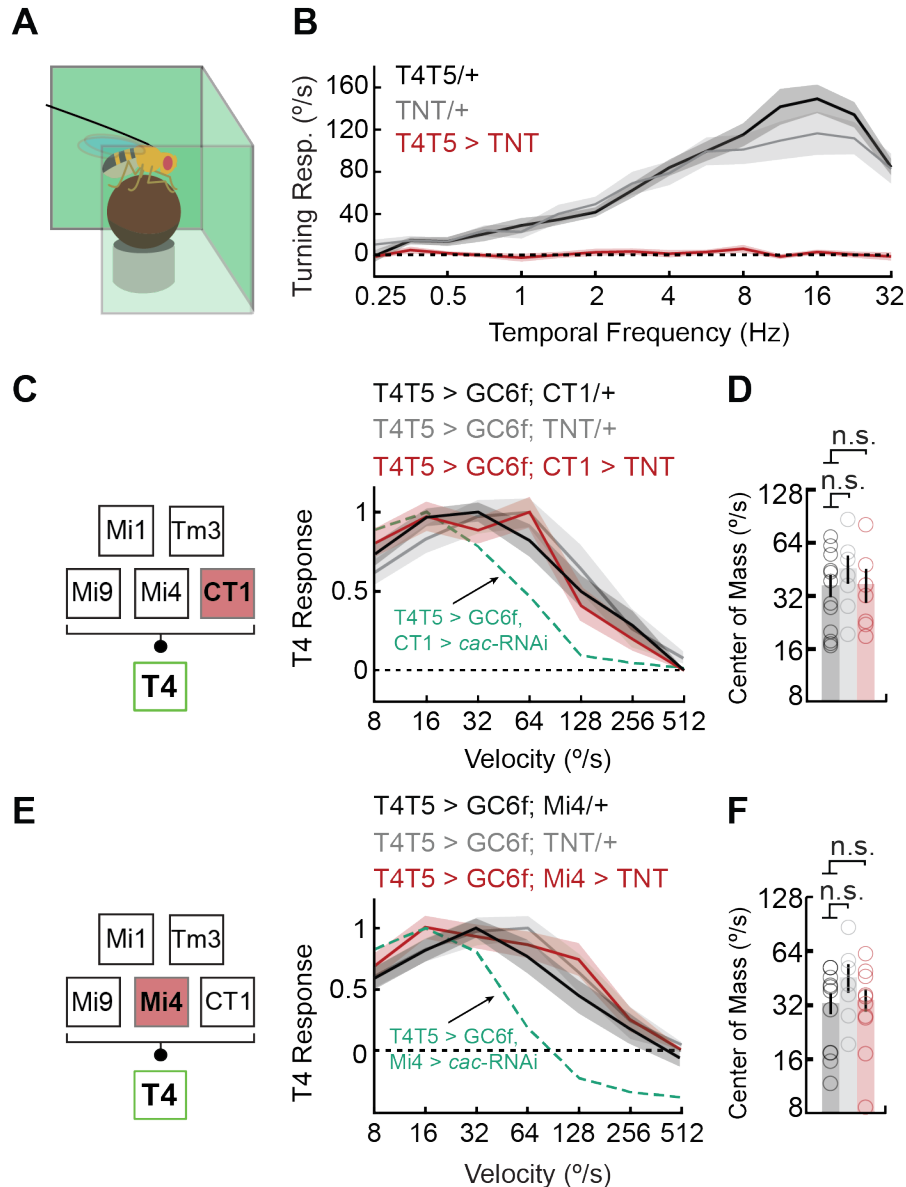

200  
201  
202  
203  
204  
205  
206  
207  
208  
209  
210  
211  
212  
213  
214

**Figure S10. Silencing CT1 or Mi4 with tetanus toxin does not affect T4 tuning.**

- (A) A fly-on-the-ball setup was used to measure flies' behavioral turning response.
- (B) Flies' turning responses to sinewave gratings of various temporal frequencies were recorded. Flies expressing tetanus toxin (TNT) in T4 and T5 (T4T5 > TNT, n = 11) were compared to two genetic controls (T4T5/+, n = 15 and TNT/+, n = 13).
- (C) T4 tuning curves of flies expressing TNT in CT1 (T4T5 > GC6f, CT1 > TNT, n = 7), compared to two genetic controls (T4T5 > GC6f; CT1/+, n = 12 and T4T5 > GC6f; TNT/+, n = 7). Dashed line represents the tuning curve of T4T5 > GC6f, CT1 > *cac*-RNAi. Lines are mean ± SEM.
- (D) The tuning curve's center of mass is a weighted average of each tuning curve shown in (C), plotted in log-velocity space.
- (E) As in (C), but for Mi4 expressing TNT (T4T5 > GC6f, Mi4 > TNT, n = 10), compared to two genetic controls (T4T5 > GC6f; Mi4/+, n = 12 and T4T5 > GC6f; TNT/+, n = 7). Dashed line represents the tuning curve of T4T5 > GC6f, Mi4 > *cac*-RNAi.

215 (F) As in (D), but for tuning curves shown in (E). (\*  $p < 0.05$ , \*\*  $p < 0.01$ , \*\*\*  $p < 0.001$  by  
216 Wilcoxon signed-rank tests across flies.)

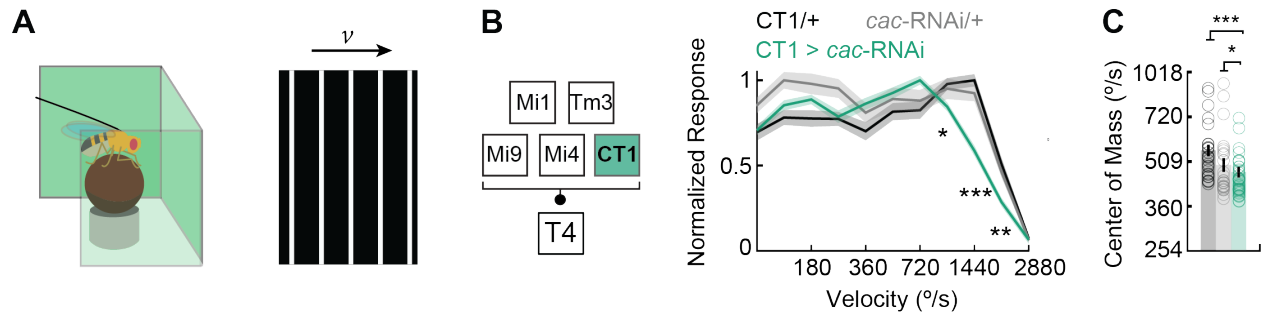

217  
218  
219  
220  
221  
222  
223  
224  
225  
226  
227  
228  
229  
230  
231  
232

**Figure S11. Knock-down of *cacophony* in CT1 mediates the dynamics of flies' turning responses.**

- (A) A fly-on-the-ball setup (*left*) was used to measure flies' behavioral turning response to moving periodic, white bars at various velocities (*right*).
- (B) Flies expressing an RNAi to knock-down the voltage-gated  $\text{Ca}^{2+}$  channel *cacophony* (*cac*) in CT1 (CT1 > *cac-RNAi*, n = 40), compared to two genetic controls (CT1/+, n = 27 and *cac-RNAi/+*, n = 27). Lines are mean  $\pm$  SEM. (\* p<0.05, \*\* p<0.01, \*\*\* p<0.001 by Wilcoxon signed-rank tests across flies.) The difference in the velocity scale between behavioral responses and T4 and T5 measurements has been well-documented (Creamer et al., 2018; Strother et al., 2017).
- (C) The tuning curve's center of mass is a weighted average of each tuning curve shown in (B), plotted in log-velocity space. (\* p<0.05, \*\* p<0.01, \*\*\* p<0.001 by Wilcoxon signed-rank one-tail tests across flies.)

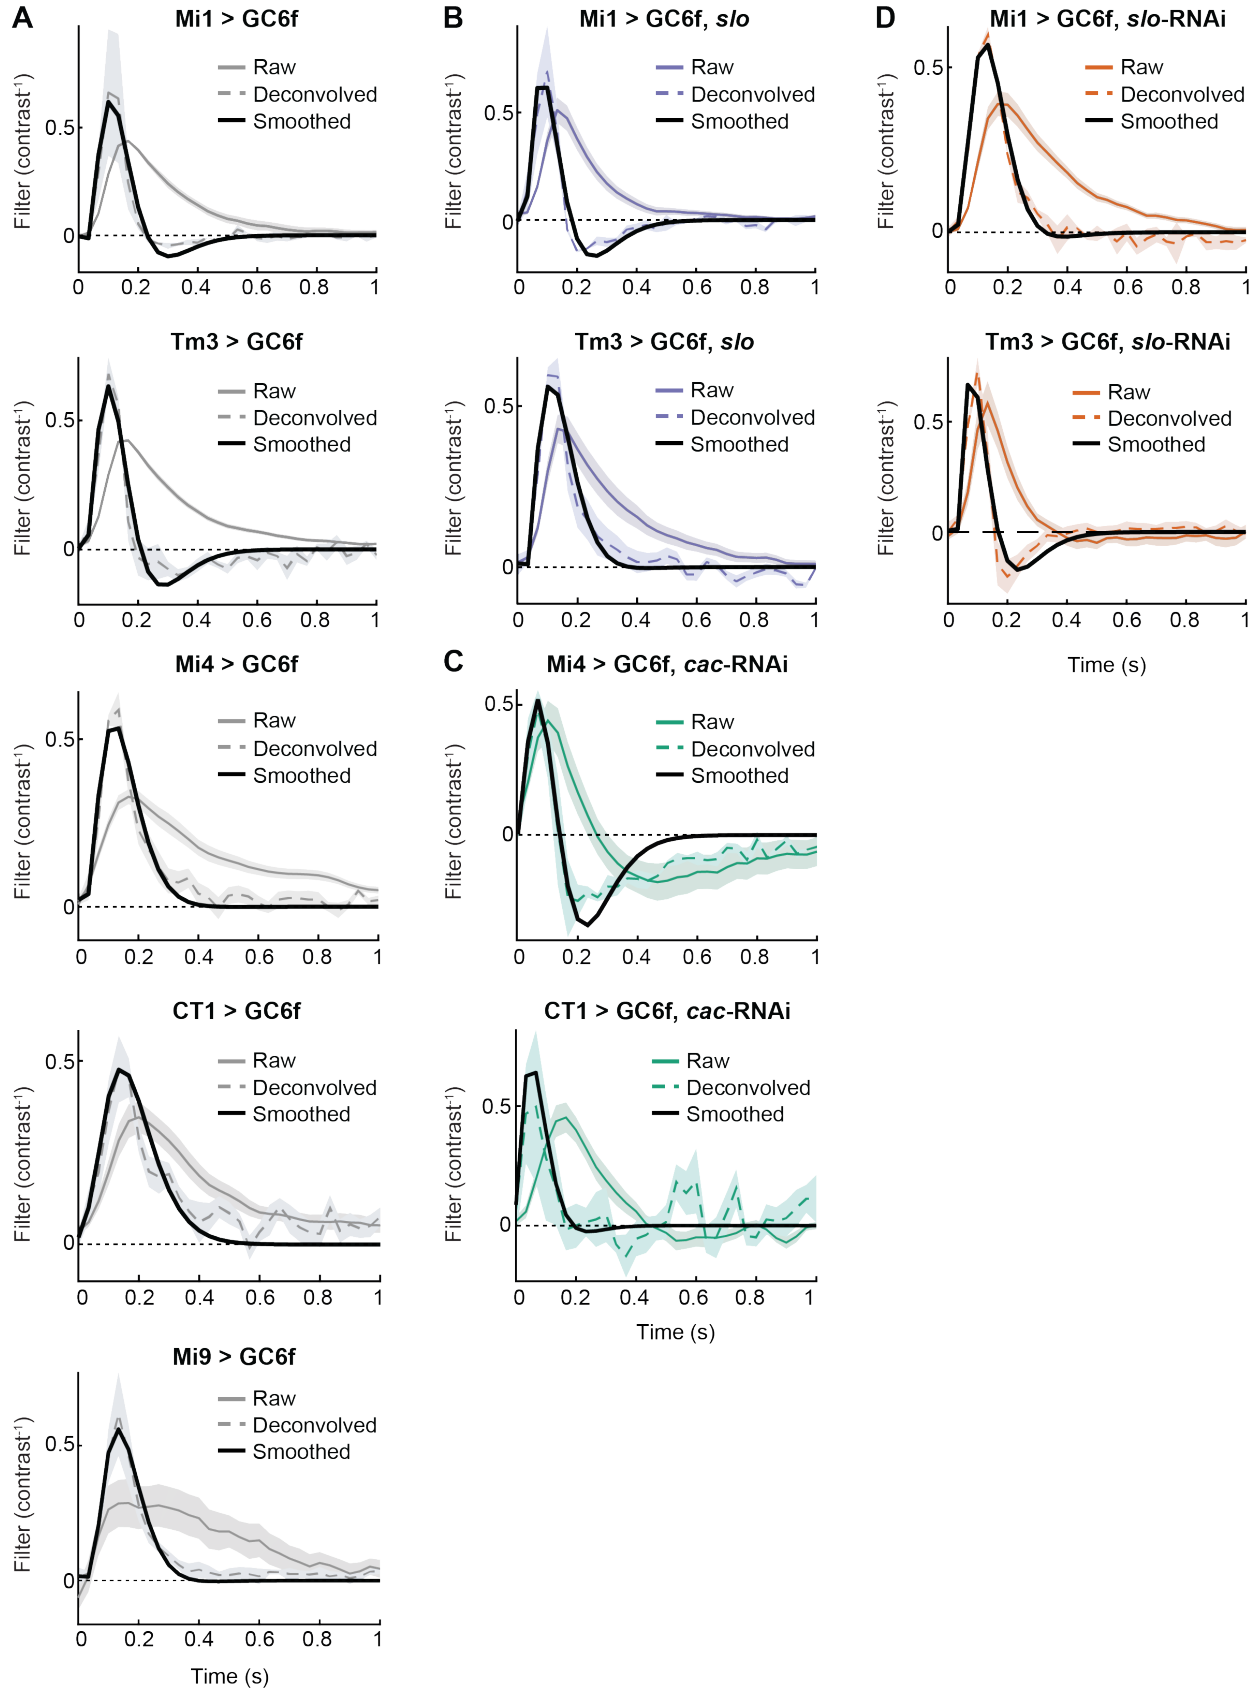

- 234 **Figure S12. Raw, de-convolved, and smoothed filters used in synaptic model.**  
235 (A) Wildtype filters, filters with de-convolved indicator dynamics (see Methods), and  
236 smoothed filters (see Methods) from wildtype Mi1 (Mi1 > GC6f), Tm3 (Tm3 > GC6f),  
237 Mi4 (Mi4 > GC6f), CT1 (CT1 > GC6f), and Mi9 (Mi9 > GC6f) (from top to bottom).  
238 (B) As in (A), but for Mi1 and Tm3 over-expressing the Ca<sup>2+</sup>-gated K<sup>+</sup> channel *slowpoke*  
239 (*slo*) (Mi1 > GC6f, *slo* and Tm3 > GC6f, *slo*) (from top to bottom).  
240 (C) As in (A), but for Mi4 and CT1 expressing RNAi to knock-down the voltage-gated Ca<sup>2+</sup>  
241 channel *cacophony* (*cac*) (Mi4 > GC6f, *cac*-RNAi and CT1 > GC6f, *cac*-RNAi) (from  
242 top to bottom).  
243 (D) As in (A), but for Mi1 and Tm3 expressing RNAi to knock-down *slo* (Mi1 > GC6f, *slo*-  
244 RNAi and Tm3 > GC6f, *slo*-RNAi) (from top to bottom).  
245

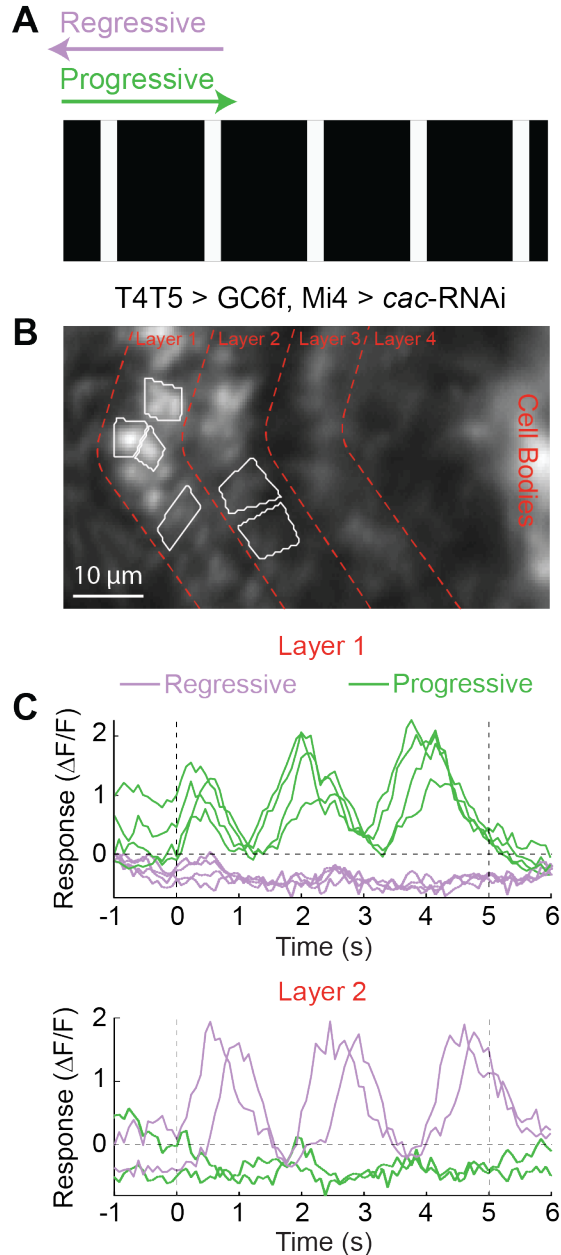

246  
247  
248  
249  
250  
251  
252  
253  
254  
255  
256  
257

**Figure S13. *Cacophony* knock-down in Mi4 does not switch the directionality of the progressive and regressive layers in the lobula plate.**

- (A) White 5°-wide bars, with 30° spacing rotate in progressive (front-to-back) and regressive directions (back-to-front) over the eye at several velocities (8-512°/s).
- (B) Regions of interest (ROIs) are selected for two of the four anatomically-restricted layers of T4 axons in a mean two-photon microscopy image of flies where the voltage-gated Ca<sup>2+</sup> channel *cacophony* (*cac*), is knocked-down (T4T5 > GC6f, Mi4 > *cac*-RNAi). ROIs in layer 1 respond to progressive stimuli (ROIs n = 4, *green*), while ROIs in layer 2 respond to regressive stimuli (ROIs n = 2, *purple*). To discriminate between ON-responding and OFF-responding ROIs, an edge selectivity index was computed from responses to light and dark edges (see Methods).



258 (C) Raw change in fluorescence of T4 ROIs responding to white bars rotating at 16 °/s. ROIs  
259 selected in layer 1 (*top panel*) versus those selected in layer 2 (*bottom panel*). Green lines  
260 correspond to stimuli moving in the regressive direction, while purple lines correspond to  
261 stimuli moving in the progressive direction.  
262

263

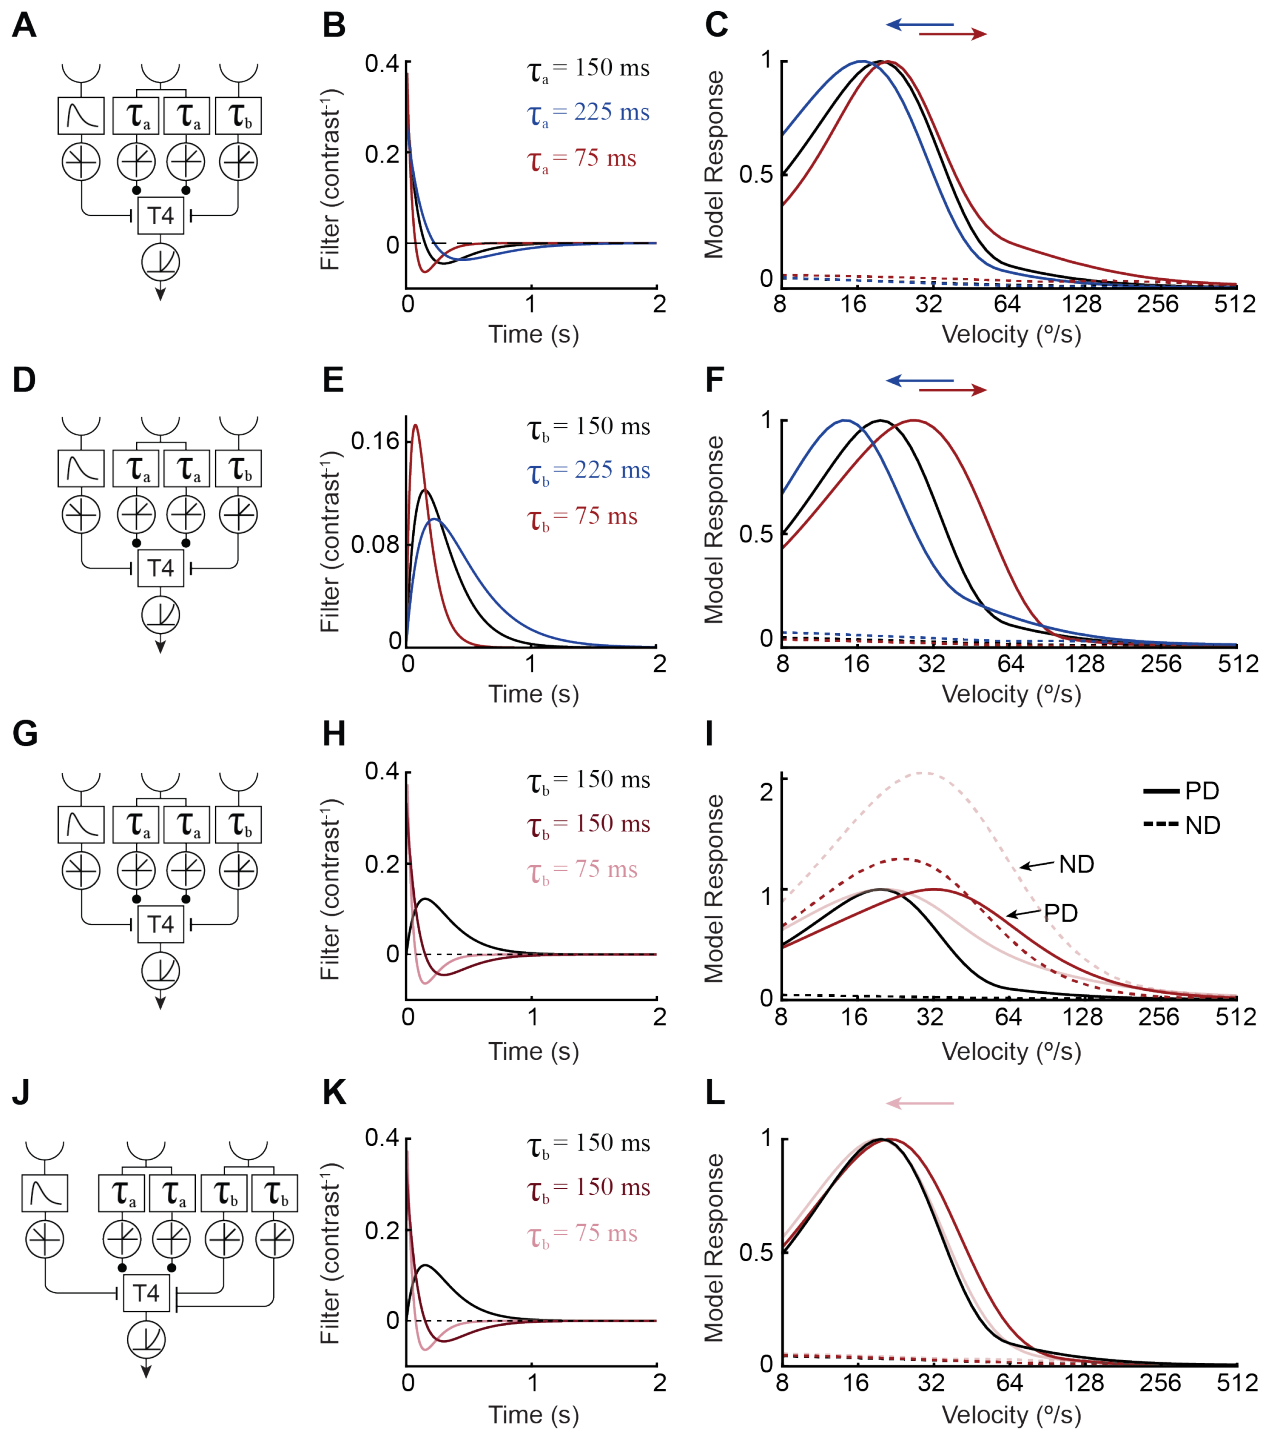

264

265

266

267

268

269

270

**Figure S14. Three-input synaptic model responds consistently to changes in the dynamics of generated, synthetic low-pass and high-pass filters.**

(A) Manipulating the dynamics of the central, excitatory input to the synaptic model. Note that only one of the arms from this central, excitatory input was manipulated at a time; the time constant of the other arm was kept fixed at its 'default' value. As the two arms are otherwise identical, the results of these manipulations apply to either arm.

- 271 **(B)** Synthetic  $\ell_2$ -normalized high-pass filters with standard dynamics ( $\tau_a = 150$  ms) were  
272 generated and compared to filters with slower ( $\tau_a = 225$  ms) or faster ( $\tau_a = 75$  ms)  
273 dynamics (see Methods).
- 274 **(C)** Model responses to periodic white bar stimuli (see Methods) as a function of velocity for  
275 each filter set. Slowing the filter dynamics ( $\tau_a = 225$  ms) shifted the model's response  
276 toward lower velocities. Conversely, models with faster filters ( $\tau_a = 75$  ms) preferred  
277 higher velocities.
- 278 **(D)** As in (A), but for manipulations of the PD-offset ON inhibitory input ( $\tau_b$ ).
- 279 **(E)** As in (B), but for the  $\ell_2$ -normalized low-pass filters used for the PD-offset  $\tau_b$  input.
- 280 **(F)** As in (C), but for manipulations of the  $\tau_b$  input. Speeding up the filter dynamics ( $\tau_b = 75$   
281 ms) shifted model responses to higher velocities, while slowing down filter dynamics ( $\tau_b$   
282 = 225 ms) shifted responses to lower velocities. Both results are inconsistent with our  
283 experimental findings.
- 284 **(G)** As in (D).
- 285 **(H)** As in (E), but with the  $\ell_2$ -normalized low-pass filters of varying time constants replaced  
286 by  $\ell_2$ -normalized high-pass filters.
- 287 **(I)** As in (F), but for the case in which the filter of the PD-offset input is high-pass. The  
288 responses of the 'default' model, in which this input has a low-pass filter with a time  
289 constant of  $\tau_b = 150$  ms, are plotted in *black*. Replacing this low-pass filter with a high-  
290 pass filter of the same time constant reverses the model's direction preference, with  
291 responses to motion in the former ND now being greater than those to motion in the  
292 former PD. Reducing the time constant of this filter to  $\tau_b = 75$  ms exacerbates this effect.
- 293 **(J)** Manipulations of the PD-offset ON inhibitory input in a synaptic model with an  
294 additional, parallel PD-offset ON inhibitory input. As in (A), only one of the two parallel  
295 inputs is manipulated at a time.
- 296 **(K)** As in (H), but for the model with parallel PD-offset ON inhibitory inputs shown in (J).  
297 The filter of the non-manipulated input of this pair is kept as low-pass.
- 298 **(L)** As in (I), but for the model described in (J-K). When a parallel PD-offset ON inhibitory  
299 delayed input is added, the reversal of direction preference observed in (I) no longer  
300 occurs. When the time constant of the manipulated input is equal to that of the other  
301 inputs ( $\tau_b = 150$  ms), exchanging its low-pass filter for a high-pass filter increases the  
302 model's preferred velocity. However, when the high-pass filter's time constant is made  
303 faster ( $\tau_b = 75$  ms), the model's sensitivity shifts to slower velocities. The latter of these  
304 simulations is consistent with our experimental findings.
- 305

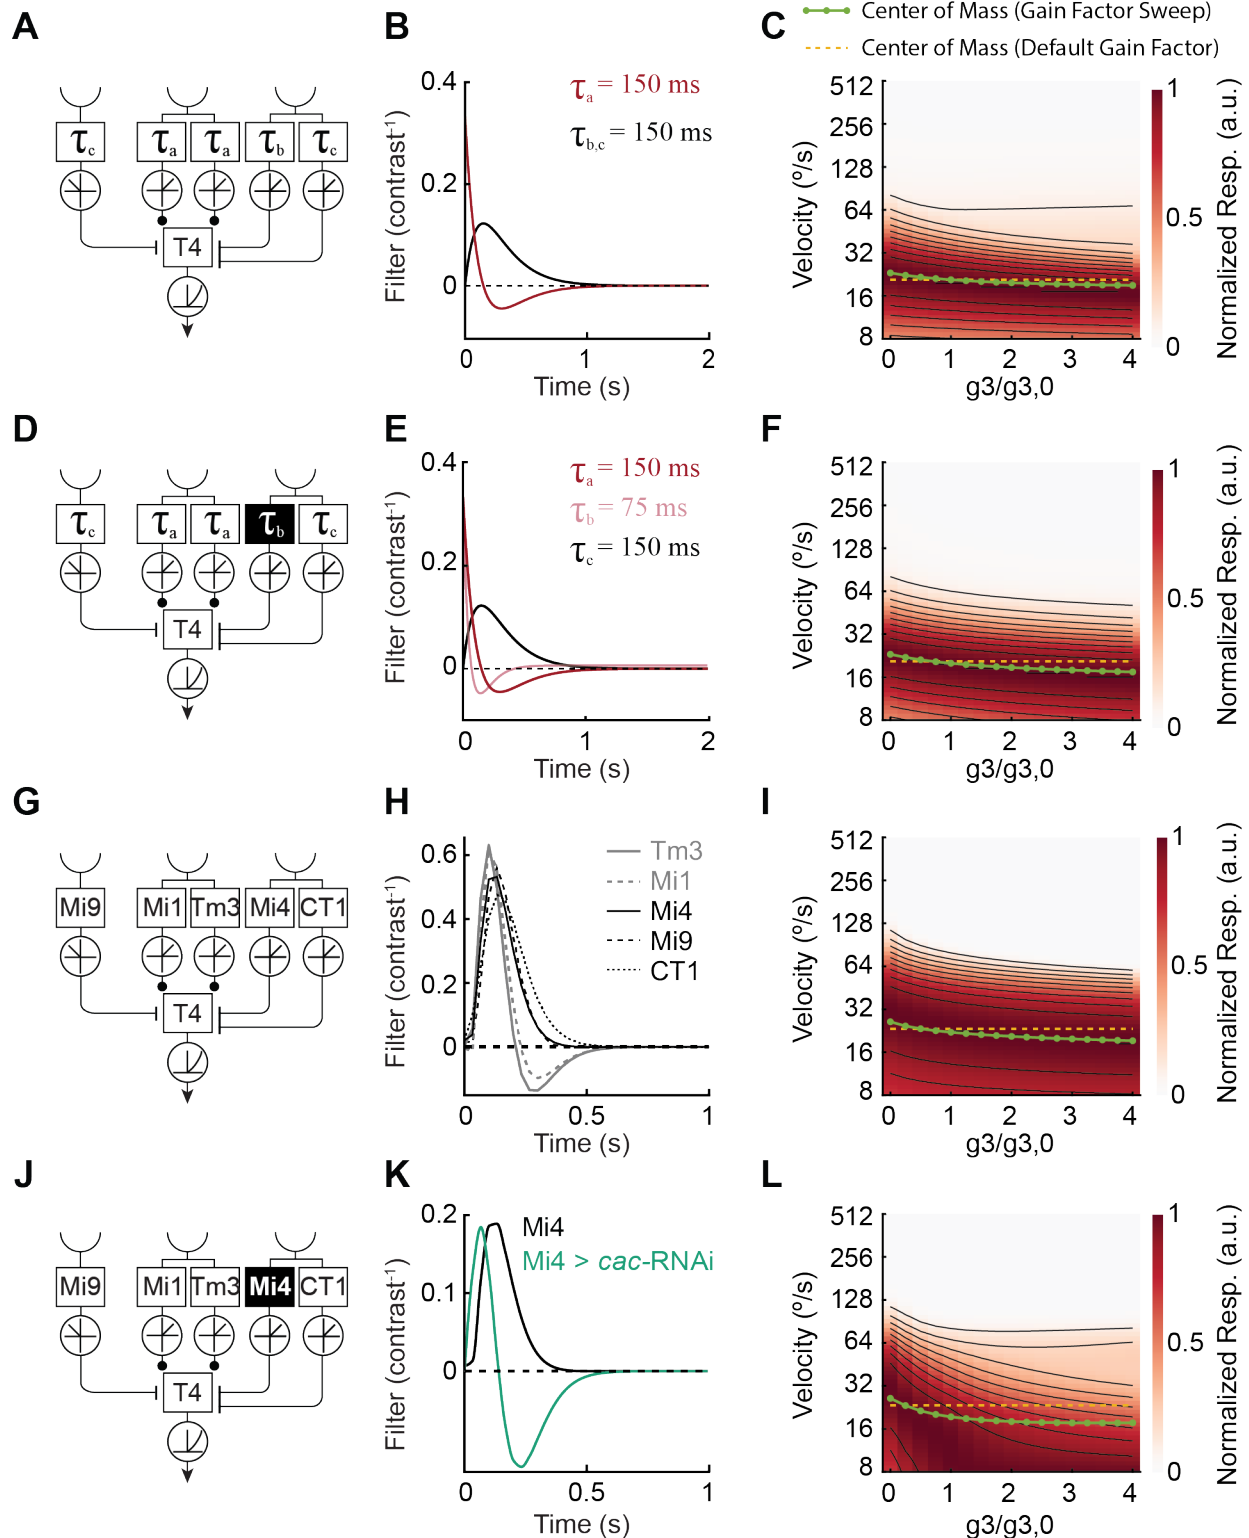

306  
307  
308  
309  
310  
311

**Figure S15. Changes in filter's gain factor tune synaptic model responses to higher motion velocity.**

(A) Three-input synaptic model with an additional, parallel delayed PD-offset ON inhibitory input was tested with default filters and filter time constants for each input. A central, excitatory spatial input is composed of two arms, each with the same temporal dynamics

- 312 ( $\tau_a$ ). Two parallel PD-offset, inhibitory arms ( $\tau_b$  and  $\tau_c$ ) share one spatial receptive field.  
313 An ND-offset OFF inhibitory input has dynamics  $\tau_c$ .
- 314 **(B)** Synthetic  $\ell_2$ -normalized low-pass ( $\tau_{b,c} = 150$  ms) and high-pass ( $\tau_a = 150$  ms) filters used  
315 in the ‘wildtype’ synaptic model.
- 316 **(C)** Sweep of fractional rescaling of the  $\tau_b$  input’s gain factor relative to its wildtype value.  
317 Tuning curves for each gain factor are shown in false color, with responses normalized  
318 by the maximal response for that gain factor. To quantify the resulting changes in tuning,  
319 the log-velocity center of mass of the wildtype model’s tuning curve (*yellow dashed line*)  
320 is compared the log-velocity centers of mass for models with altered gain factors (*green*  
321 *dotted line*). Here and below, decreasing the gain  $g_3$  of the PD-offset inhibitory input to  
322 T4 relative to its ‘default’ value  $g_{3,0}$  tended to shift T4 tuning to higher velocities. Thus,  
323 the decrease in Mi4 and CT1 filter amplitude (ignoring changes in dynamics) under *cac*-  
324 RNAi manipulation would not, according to this model, be expected to shift tuning  
325 curves to slower velocities, as observed in experiments.
- 326 **(D)** As in (A), but with manipulation of the  $\tau_b$  input filter as in Figure S14G.
- 327 **(E)** As in (B), but with the filter set used in Figure S14G-L.
- 328 **(F)** As in (C), but with the filters shown in (E).
- 329 **(G)** As in (A), but for a model using data-driven filters (see Methods) of Mi9, Mi1, Tm3,  
330 Mi4, and CT1.
- 331 **(H)** Data-driven filters used to test model described in (G).
- 332 **(I)** As in (C), but using the filters of (H). Here, the gain factor for the Mi4-like input is  
333 manipulated, while that for the CT1-like input is kept fixed.
- 334 **(J)** As in (A), but the Mi4-like input is manipulated with the Mi4 > *cac*-RNAi wildtype filter.
- 335 **(K)** Data-driven filters of Mi4 and Mi4 > *cac*-RNAi used to test the model described in (J).
- 336 **(L)** As in (I), but using the data-driven filters of (K).
- 337  
338
